# Supplementary material for: Comparative Transcriptome Analysis of Purple and Green Flowering Chinese Cabbage and Functional Analyses of BrMYB114 Gene
Source: MDPI journal article supplement (doi:10.3390/ijms241813951), 2023-09-11
Supplement: s1 [file s1]

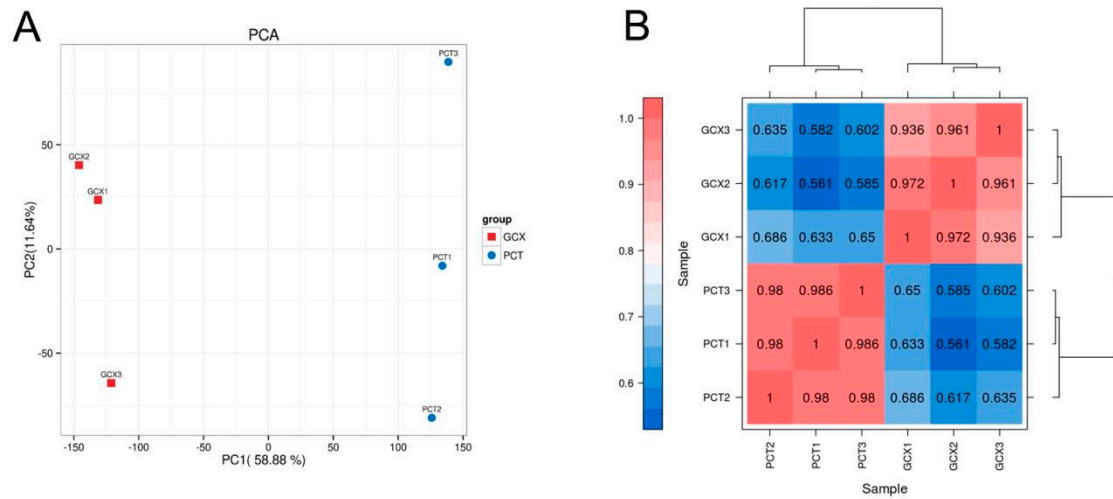

**Figure S1** PCA analysis and Intergroup correlation analysis of PCT and GCX. Principal component analysis of each group samples (A). Intergroup correlation analysis of each group samples (B).

|          |                                                                                      |     |
|----------|--------------------------------------------------------------------------------------|-----|
| BrMYB2   | ATGGAGGGTTCGTCCTCCCAAGGGTTGAAAAAAGGTGCATGGACTGCTGAAGAAGATAATCTCTTGAGGCAATGCATTGATAA  | 80  |
| BrMYB114 | ATGGAGGGTTCGTCCTCCCAAGGGTTGAAAAAAGGTGCATGGACTGCTGAAGAAGATAATCTCTTGAGGCAATGCATTGATAA  | 80  |
| Consnsus | atggaggggttcgctcccaagggttgaaaaaaggtgcatggactgctgaagaagataatctcttgaggcaatgcattgataa   |     |
| BrMYB2   | GTATGGAGAAGGGAAATGGCACCAGTTCCTTTAAGAGCTGGTCTAAATCGGTGCAGGAAGAGTTGTAGACTAAGATGGT      | 160 |
| BrMYB114 | GTATGGAGAAGGGAAATGGCACCAGTTCCTTTAAGAGCTGGTCTAAATCGGTGCAGGAAGAGTTGTAGACTAAGATGGT      | 160 |
| Consnsus | gtatggagaagggaaatggcaccagttcctttaagagctgggtctaaatcgggtgcaggaagagttgtagactaagatgg     |     |
| BrMYB2   | TGAACATTTTGAAGCCAAGTATCAAGAGAGGAAAACTCAACTCCGATGAAGTTGATCTTCTTATTCGCCCTTCATAAGCTT    | 240 |
| BrMYB114 | TGAACATTTTGAAGCCAAGTATCAAGAGAGGAAAACTCAACTCCGATGAAGTTGATCTTCTTATTCGCCCTTCATAAGCTT    | 240 |
| Consnsus | tgaactatttgaagccaagtatcaagagagggaaaaactcaactccgatgaagttgatcttcttatttcgaccttcataagctt |     |
| BrMYB2   | TTAGGAACAGGTGGTCTTTAATTGCTGGTAGATTACCCGGTCGGACCGCCAATGACGTCAAAAATTACTGGAACACCCA      | 320 |
| BrMYB114 | TTAGGAACAGGTGGTCTTTAATTGCTGGTAGATTACCCGGTCGGACCGCCAATGACGTCAAAAATTACTGGAACACCCA      | 320 |
| Consnsus | ttaggaaacaggtgggtctttaattgctggtagattaccggctcggaccgccaatgacgtcaaaaattactggaaacaccca   |     |
| BrMYB2   | TTTGAGTAAGAAACATGAACCGGGTTGTAAGACCCAGATGAAAAAGAGAAACATTCTTGCTCTTATACCACACCAGCC       | 400 |
| BrMYB114 | TTTGAGTAAGAAACATGAACCGGGTTGTAAGACCCAGATGAAAAAGAGAAACATTCTTGCTCTTATACCACACCAGCC       | 400 |
| Consnsus | tttgagtaagaaacatgaaccgggttgtaagaccagatgaaaaagagaaacattcttgctcttataccacaccagcc        |     |
| BrMYB2   | AAAAAATCGACGTTTTCAACCTCGACCTCGATCCTTCACCGTTAACAGCGGCTGCAGCCATAAATATGGCATGCCAGAA      | 480 |
| BrMYB114 | AAAAAATCGACGTTTTCAACCTCGACCTCGATCCTTCACCGTTAACAGCGGCTGCAGCCATAAATATGGCATGCCAGAA      | 480 |
| Consnsus | :aaaaaatcgacgttttcaaacctcgacctcgatccttcaccgttaacagcggctgcagccataataatggcatgccagaa    |     |
| BrMYB2   | GCTGGCATTGTTCTCTATGCCTTGGACACAAACGATACTAATAATGTTTCTGAAAATATAATCACATGTAACAAAGATGA     | 560 |
| BrMYB114 | GCTGGCATTGTTCTCTATGCCTTGGACACAAACGATACTAATAATGTTTCTGAAAATATAATCACATGTAACAAAGATGA     | 560 |
| Consnsus | gctggcattgttctctatgccttggacacaaacgataactaataatgtttctgaaaatataatcacatgtaacaaagatga    |     |
| BrMYB2   | TGATAAATCTGAGCTTGTTAGTCATTTAATGGATGGTCAGAATAGGTGGTGGGAAAGTTTGCTAGATGAGAGCCAAGATC     | 640 |
| BrMYB114 | TGATAAATCTGAGCTTGTTAGTCATTTAATGGATGGTCAGAATAGGTGGTGGGAAAGTTTGCTAGATGAGAGCCAAGATC     | 640 |
| Consnsus | tgataaatctgagcttggttagtcatttaattggatggtcagaataggtgggtgggaaagtgttgctagatgagagccaagatc |     |
| BrMYB2   | CAGCTGCGCTCTTTCCAGAACTACAGCAATAAAAAAGGGCGCAACCTCCGCGTTTGACGTTGAGCAACTTTGGAGCCTG      | 720 |
| BrMYB114 | CAGCTGCGCTCTTTCCAGAACTACAGCAATAAAAAAGGGCGCAACCTCCGCGTTTGACGTTGAGCAACTTTGGAGCCTG      | 720 |
| Consnsus | cagctgcgctctttccagaaactacagcaataaaaaagggcgcaacctccgcgtttgacgttgagcaactttggagcctg     |     |
| BrMYB2   | TTGGATGGAGAACTGGAACCTTGA                                                             | 743 |
| BrMYB114 | TTGGATGGAGAACTGGAACCTTGA                                                             | 743 |
| Consnsus | ttggatggagaaactggaacttga                                                             |     |

**Figure S2** DNA sequence alignment of BrMYB2 and BrMYB114
