# Supplementary material for: Comparative Transcriptome Analysis of Purple and Green Flowering Chinese Cabbage and Functional Analyses of BrMYB114 Gene
Source: Int J Mol Sci. 2023 Sep 11;24(18):13951. doi: 10.3390/ijms241813951 (PMC10531404; doi:10.3390/ijms241813951)
Supplement: Supplementary file 1 [file ijms-24-13951-s001.zip]

Archive with 7 entries (7 files):
- Supplementary Materia figures.pdf
- Table S1.xlsx
- Table S2.xlsx
- Table S4.xlsx
- Table S5.xlsx
- Table S6.xlsx
- Table S7.xlsx
