# Supplementary material for: Comparative Transcriptome Analysis of Purple and Green Flowering Chinese Cabbage and Functional Analyses of BrMYB114 Gene
Source: Int J Mol Sci. 2023 Sep 11;24(18):13951. doi: 10.3390/ijms241813951 (PMC10531404; doi:10.3390/ijms241813951)
Supplement: Supplementary file 1 [file ijms-24-13951-s001.zip › Table S1.xlsx]

## Sheet: Sheet1
Supplemental Table S1: Sequencing data statistics.
#SampleID	ReadSum	BaseSum	GC(%)	N(%)	Q20(%)	Q30(%)
GCX1	22429257	6711779884	46.96	0	98.89	93.69
GCX2	23365224	6984247460	47.35	0	98.51	92.11
GCX3	21775825	6514126772	47.19	0.01	98.56	92.26
PCT1	22365391	6697027464	47.53	0.01	98.6	92.69
PCT2	19151923	5733709022	47.41	0.01	98.91	93.93
PCT3	21691511	6488872580	47.55	0.01	98.68	92.92
