# Supplementary material for: Comparative Transcriptome Analysis of Purple and Green Flowering Chinese Cabbage and Functional Analyses of BrMYB114 Gene
Source: Int J Mol Sci. 2023 Sep 11;24(18):13951. doi: 10.3390/ijms241813951 (PMC10531404; doi:10.3390/ijms241813951)
Supplement: Supplementary file 1 [file ijms-24-13951-s001.zip › Table S2.xlsx]

## Sheet: Sheet1
Supplemental Table S2: Mapping rate of sequencing data.
Sample	Total Reads	Mapped Reads	Uniq Mapped Reads	Multiple Map Reads	Reads Map to '+'	Reads Map to '-'
GCX1	44858514	37,485,699 (83.56%)	36,329,557 (80.99%)	1,156,142 (2.58%)	19,763,919 (44.06%)	19,882,726 (44.32%)
GCX2	46730448	37,817,935 (80.93%)	36,289,654 (77.66%)	1,528,281 (3.27%)	20,577,672 (44.03%)	20,728,966 (44.36%)
GCX3	43551650	35,773,130 (82.14%)	34,834,942 (79.99%)	938,188 (2.15%)	18,591,724 (42.69%)	18,732,217 (43.01%)
PCT1	44730782	37,076,710 (82.89%)	36,116,164 (80.74%)	960,546 (2.15%)	19,207,431 (42.94%)	19,383,482 (43.33%)
PCT2	38303846	32,613,424 (85.14%)	31,782,154 (82.97%)	831,270 (2.17%)	16,929,060 (44.20%)	17,028,211 (44.46%)
PCT3	43383022	36,263,172 (83.59%)	35,317,500 (81.41%)	945,672 (2.18%)	18,831,587 (43.41%)	18,961,996 (43.71%)
