# Supplementary material for: Comparative Transcriptome Analysis of Purple and Green Flowering Chinese Cabbage and Functional Analyses of BrMYB114 Gene
Source: Int J Mol Sci. 2023 Sep 11;24(18):13951. doi: 10.3390/ijms241813951 (PMC10531404; doi:10.3390/ijms241813951)
Supplement: Supplementary file 1 [file ijms-24-13951-s001.zip › Table S4.xlsx]

## Sheet: Sheet1
Supplemental Table S4: The GO terms enriched by the DEGs.
ID	Description	GeneRatio	BgRatio	enrich_factor	pvalue	qvalue	geneID	gene_number	Contained	GO_classify
GO:0000079	regulation of cyclin-dependent protein serine/threonine kinase activity	0.0085	0.0032	2.68	1.16879e-06	0.00299702	BraA01g004150.3.5C;BraA02g001940.3.5C;BraA02g007060.3.5C;BraA03g002440.3.5C;BraA03g023650.3.5C;BraA03g059660.3.5C;BraA03g060810.3.5C;BraA05g004670.3.5C;BraA05g004900.3.5C;BraA05g021430.3.5C;BraA05g031550.3.5C;BraA06g010900.3.5C;BraA06g011570.3.5C;BraA06g031510.3.5C;BraA07g017190.3.5C;BraA07g025140.3.5C;BraA07g040890.3.5C;BraA08g005440.3.5C;BraA08g005450.3.5C;BraA08g028370.3.5C;BraA08g030620.3.5C;…	25	up&down	Biological Process
GO:0006270	DNA replication initiation	0.0041	0.0011	3.73	1.22015e-05	0.0156435	BraA03g024900.3.5C;BraA03g029730.3.5C;BraA03g042610.3.5C;BraA03g043040.3.5C;BraA03g043650.3.5C;BraA05g037940.3.5C;BraA06g043410.3.5C;BraA06g044370.3.5C;BraA07g041770.3.5C;BraA09g002260.3.5C;BraA09g027080.3.5C;BraA10g005960.3.5C	12	up	Biological Process
GO:0035308	negative regulation of protein dephosphorylation	0.0034	0.0008	4.08	2.27835e-05	0.0178734	BraA03g019980.3.5C;BraA04g023730.3.5C;BraA04g028310.3.5C;BraA05g013560.3.5C;BraA07g009060.3.5C;BraA08g013180.3.5C;BraA09g008300.3.5C;BraA09g032200.3.5C;BraA10g000560.3.5C;BraA10g013760.3.5C	10	up&down	Biological Process
GO:0044772	mitotic cell cycle phase transition	0.0065	0.0025	2.64	2.78813e-05	0.0178734	BraA01g004150.3.5C;BraA02g001940.3.5C;BraA02g007060.3.5C;BraA03g002440.3.5C;BraA03g059660.3.5C;BraA03g060810.3.5C;BraA05g021430.3.5C;BraA05g031550.3.5C;BraA06g010900.3.5C;BraA06g011570.3.5C;BraA06g031510.3.5C;BraA07g017190.3.5C;BraA07g040890.3.5C;BraA08g005440.3.5C;BraA08g005450.3.5C;BraA08g028370.3.5C;BraA08g030620.3.5C;BraA09g060380.3.5C;BraA10g027500.3.5C	19	up&down	Biological Process
GO:0032515	negative regulation of phosphoprotein phosphatase activity	0.0031	0.0007	4.2	4.36411e-05	0.022381	BraA03g019980.3.5C;BraA04g023730.3.5C;BraA04g028310.3.5C;BraA05g013560.3.5C;BraA07g009060.3.5C;BraA08g013180.3.5C;BraA09g032200.3.5C;BraA10g000560.3.5C;BraA10g013760.3.5C	9	up&down	Biological Process
GO:0010438	cellular response to sulfur starvation	0.0017	0.0003	6.54	8.36498e-05	0.0306422	BraA02g041570.3.5C;BraA06g036570.3.5C;BraA08g035210.3.5C;BraA09g004540.3.5C;BraA10g003170.3.5C	5	up&down	Biological Process
GO:0010439	regulation of glucosinolate biosynthetic process	0.0017	0.0003	6.54	8.36498e-05	0.0306422	BraA02g041570.3.5C;BraA06g036570.3.5C;BraA08g035210.3.5C;BraA09g004540.3.5C;BraA10g003170.3.5C	5	up&down	Biological Process
GO:0009733	response to auxin	0.0181	0.0109	1.66	0.000101844	0.0326438	BraA01g000150.3.5C;BraA01g000170.3.5C;BraA01g002500.3.5C;BraA01g003510.3.5C;BraA01g003530.3.5C;BraA01g003540.3.5C;BraA01g003550.3.5C;BraA02g007550.3.5C;BraA02g007560.3.5C;BraA02g007580.3.5C;BraA02g007600.3.5C;BraA02g007610.3.5C;BraA02g007620.3.5C;BraA02g023730.3.5C;BraA02g036780.3.5C;BraA02g036790.3.5C;BraA02g039960.3.5C;BraA02g045580.3.5C;BraA03g008320.3.5C;BraA03g008330.3.5C;BraA03g008340.3.5C;…	53	up&down	Biological Process
GO:0009416	response to light stimulus	0.016	0.0094	1.71	0.000116297	0.0331344	BraA01g002950.3.5C;BraA01g003750.3.5C;BraA01g029970.3.5C;BraA01g031720.3.5C;BraA02g000200.3.5C;BraA02g002300.3.5C;BraA02g011820.3.5C;BraA02g012110.3.5C;BraA02g014370.3.5C;BraA02g025510.3.5C;BraA02g025730.3.5C;BraA02g026880.3.5C;BraA03g002930.3.5C;BraA03g016210.3.5C;BraA03g024450.3.5C;BraA03g028390.3.5C;BraA03g044670.3.5C;BraA03g060640.3.5C;BraA04g002800.3.5C;BraA04g011540.3.5C;BraA04g022350.3.5C;…	47	up&down	Biological Process
GO:0015979	photosynthesis	0.0102	0.0055	1.87	0.000372659	0.0955577	BraA01g008750.3.5C;BraA01g008860.3.5C;BraA01g012020.3.5C;BraA01g021340.3.5C;BraA01g037370.3.5C;BraA02g017890.3.5C;BraA02g046280.3.5C;BraA03g025040.3.5C;BraA03g030230.3.5C;BraA03g048960.3.5C;BraA04g015760.3.5C;BraA05g006420.3.5C;BraA05g010160.3.5C;BraA05g014040.3.5C;BraA06g012020.3.5C;BraA06g023760.3.5C;BraA06g032120.3.5C;BraA07g020230.3.5C;BraA07g023310.3.5C;BraA07g032170.3.5C;BraA07g039450.3.5C;…	30	up&down	Biological Process
GO:0007165	signal transduction	0.0399	0.03	1.33	0.000597872	0.13937	BraA01g002950.3.5C;BraA01g010290.3.5C;BraA01g010850.3.5C;BraA01g015400.3.5C;BraA01g034280.3.5C;BraA01g040750.3.5C;BraA01g044510.3.5C;BraA02g000960.3.5C;BraA02g003510.3.5C;BraA02g007310.3.5C;BraA02g007330.3.5C;BraA02g007720.3.5C;BraA02g007730.3.5C;BraA02g008120.3.5C;BraA02g018860.3.5C;BraA02g022060.3.5C;BraA02g022080.3.5C;BraA02g022090.3.5C;BraA02g023240.3.5C;BraA02g025310.3.5C;BraA02g034000.3.5C;…	117	up&down	Biological Process
GO:0035305	negative regulation of dephosphorylation	0.0024	0.0006	3.81	0.000757685	0.161905	BraA03g019980.3.5C;BraA04g028310.3.5C;BraA07g009060.3.5C;BraA08g013180.3.5C;BraA09g032200.3.5C;BraA10g000560.3.5C;BraA10g013760.3.5C	7	up&down	Biological Process
GO:0009314	response to radiation	0.0113	0.0065	1.73	0.000919935	0.178003	BraA01g002950.3.5C;BraA01g003750.3.5C;BraA01g031720.3.5C;BraA02g012110.3.5C;BraA03g016210.3.5C;BraA03g024450.3.5C;BraA03g028390.3.5C;BraA03g044670.3.5C;BraA03g060640.3.5C;BraA04g002800.3.5C;BraA04g011540.3.5C;BraA04g022350.3.5C;BraA04g030900.3.5C;BraA04g031220.3.5C;BraA05g000240.3.5C;BraA05g000870.3.5C;BraA05g002730.3.5C;BraA05g003080.3.5C;BraA05g014070.3.5C;BraA06g035690.3.5C;BraA06g044270.3.5C;…	33	up&down	Biological Process
GO:0010411	xyloglucan metabolic process	0.0061	0.0029	2.14	0.000971858	0.178003	BraA01g007440.3.5C;BraA01g007450.3.5C;BraA01g007460.3.5C;BraA01g016610.3.5C;BraA02g036400.3.5C;BraA03g019070.3.5C;BraA03g029050.3.5C;BraA03g042660.3.5C;BraA03g056660.3.5C;BraA03g056670.3.5C;BraA03g062320.3.5C;BraA04g027340.3.5C;BraA05g008420.3.5C;BraA06g041500.3.5C;BraA08g032640.3.5C;BraA09g060980.3.5C;BraA10g025120.3.5C;BraA10g025220.3.5C	18	up&down	Biological Process
GO:0009664	plant-type cell wall organization	0.0082	0.0043	1.89	0.0011457	0.186094	BraA02g019820.3.5C;BraA02g037120.3.5C;BraA03g000670.3.5C;BraA03g007020.3.5C;BraA03g007030.3.5C;BraA03g020910.3.5C;BraA03g021550.3.5C;BraA03g044440.3.5C;BraA04g016360.3.5C;BraA04g024720.3.5C;BraA04g029040.3.5C;BraA04g029980.3.5C;BraA05g001810.3.5C;BraA05g006320.3.5C;BraA06g017190.3.5C;BraA06g040860.3.5C;BraA07g015730.3.5C;BraA07g016390.3.5C;BraA07g035490.3.5C;BraA07g041420.3.5C;BraA08g035860.3.5C;…	24	up&down	Biological Process
GO:0035304	regulation of protein dephosphorylation	0.0034	0.0012	2.84	0.00116118	0.186094	BraA03g019980.3.5C;BraA04g028310.3.5C;BraA05g012040.3.5C;BraA06g041730.3.5C;BraA07g009060.3.5C;BraA08g013180.3.5C;BraA09g032200.3.5C;BraA10g000560.3.5C;BraA10g013760.3.5C;BraA10g033080.3.5C	10	up&down	Biological Process
GO:0000076	DNA replication checkpoint	0.002	0.0005	3.92	0.00153551	0.23161	BraA03g016590.3.5C;BraA05g013700.3.5C;BraA05g040900.3.5C;BraA05g042560.3.5C;BraA07g041770.3.5C;BraAnng000140.3.5C	6	up	Biological Process
GO:0009753	response to jasmonic acid	0.0072	0.0038	1.91	0.00201674	0.287297	BraA01g029860.3.5C;BraA01g034280.3.5C;BraA02g042960.3.5C;BraA02g042970.3.5C;BraA02g047370.3.5C;BraA03g017510.3.5C;BraA04g018400.3.5C;BraA05g012990.3.5C;BraA05g027830.3.5C;BraA06g034570.3.5C;BraA07g012160.3.5C;BraA07g043290.3.5C;BraA08g002880.3.5C;BraA09g000390.3.5C;BraA09g001060.3.5C;BraA09g005720.3.5C;BraA09g036870.3.5C;BraA10g006600.3.5C;BraAnng002740.3.5C;BraAnng004750.3.5C;BraAnng004820.3.5C	21	up&down	Biological Process
GO:0061635	regulation of protein complex stability	0.0014	0.0003	5.23	0.00240189	0.317343	BraA02g002260.3.5C;BraA07g013700.3.5C;BraA08g026480.3.5C;BraA10g030150.3.5C	4	up&down	Biological Process
GO:0010923	negative regulation of phosphatase activity	0.0024	0.0007	3.27	0.00247517	0.317343	BraA03g019980.3.5C;BraA04g028310.3.5C;BraA07g009060.3.5C;BraA08g013180.3.5C;BraA09g032200.3.5C;BraA10g000560.3.5C;BraA10g013760.3.5C	7	up&down	Biological Process
GO:0010563	negative regulation of phosphorus metabolic process	0.0027	0.0009	2.9	0.00307905	0.338355	BraA03g019980.3.5C;BraA03g044670.3.5C;BraA04g028310.3.5C;BraA07g009060.3.5C;BraA08g013180.3.5C;BraA09g032200.3.5C;BraA10g000560.3.5C;BraA10g013760.3.5C	8	up&down	Biological Process
GO:0045936	negative regulation of phosphate metabolic process	0.0027	0.0009	2.9	0.00307905	0.338355	BraA03g019980.3.5C;BraA03g044670.3.5C;BraA04g028310.3.5C;BraA07g009060.3.5C;BraA08g013180.3.5C;BraA09g032200.3.5C;BraA10g000560.3.5C;BraA10g013760.3.5C	8	up&down	Biological Process
GO:0009641	shade avoidance	0.0017	0.0004	4.08	0.00311884	0.338355	BraA03g024450.3.5C;BraA04g002800.3.5C;BraA04g031220.3.5C;BraA05g000870.3.5C;BraA05g003080.3.5C	5	up&down	Biological Process
GO:0009630	gravitropism	0.0038	0.0016	2.4	0.00342619	0.338355	BraA02g018830.3.5C;BraA02g030550.3.5C;BraA02g036480.3.5C;BraA06g030310.3.5C;BraA06g039270.3.5C;BraA07g016960.3.5C;BraA07g036660.3.5C;BraA08g025830.3.5C;BraA09g009180.3.5C;BraA09g039260.3.5C;BraA10g024960.3.5C	11	up&down	Biological Process
GO:0006792	regulation of sulfur utilization	0.001	0.0002	6.54	0.00357978	0.338355	BraA02g041570.3.5C;BraA06g036570.3.5C;BraA09g004540.3.5C	3	up&down	Biological Process
GO:0009808	lignin metabolic process	0.001	0.0002	6.54	0.00357978	0.338355	BraA03g016180.3.5C;BraA04g022890.3.5C;BraA05g014090.3.5C	3	up&down	Biological Process
GO:1901601	strigolactone biosynthetic process	0.001	0.0002	6.54	0.00357978	0.338355	BraA01g044500.3.5C;BraA05g043370.3.5C;BraA09g067100.3.5C	3	up&down	Biological Process
GO:0071395	cellular response to jasmonic acid stimulus	0.0055	0.0027	2.01	0.00369468	0.338355	BraA01g034280.3.5C;BraA02g042960.3.5C;BraA02g042970.3.5C;BraA03g017510.3.5C;BraA04g018400.3.5C;BraA05g012990.3.5C;BraA05g027830.3.5C;BraA06g034570.3.5C;BraA07g043290.3.5C;BraA09g000390.3.5C;BraA09g001060.3.5C;BraA09g005720.3.5C;BraA09g036870.3.5C;BraAnng002740.3.5C;BraAnng004750.3.5C;BraAnng004820.3.5C	16	up&down	Biological Process
GO:0009867	jasmonic acid mediated signaling pathway	0.0058	0.003	1.95	0.00403198	0.341856	BraA01g034280.3.5C;BraA02g042960.3.5C;BraA02g042970.3.5C;BraA03g017510.3.5C;BraA03g055720.3.5C;BraA04g018400.3.5C;BraA05g012990.3.5C;BraA05g027830.3.5C;BraA06g034570.3.5C;BraA07g043290.3.5C;BraA09g000390.3.5C;BraA09g001060.3.5C;BraA09g005720.3.5C;BraA09g036870.3.5C;BraAnng002740.3.5C;BraAnng004750.3.5C;BraAnng004820.3.5C	17	up&down	Biological Process
GO:0010921	regulation of phosphatase activity	0.0024	0.0008	3.05	0.00403212	0.341856	BraA03g019980.3.5C;BraA04g028310.3.5C;BraA07g009060.3.5C;BraA08g013180.3.5C;BraA09g032200.3.5C;BraA10g000560.3.5C;BraA10g013760.3.5C	7	up&down	Biological Process
GO:0018298	protein-chromophore linkage	0.0051	0.0025	2.04	0.00413287	0.341856	BraA01g029970.3.5C;BraA02g000200.3.5C;BraA02g014370.3.5C;BraA05g010630.3.5C;BraA05g010640.3.5C;BraA06g006520.3.5C;BraA06g023760.3.5C;BraA06g023770.3.5C;BraA07g025470.3.5C;BraA08g005690.3.5C;BraA08g028970.3.5C;BraA08g030320.3.5C;BraA09g047590.3.5C;BraA09g064170.3.5C;BraAnng000580.3.5C	15	up&down	Biological Process
GO:0009833	plant-type primary cell wall biogenesis	0.0027	0.001	2.75	0.00461216	0.367212	BraA01g000410.3.5C;BraA01g045110.3.5C;BraA03g004120.3.5C;BraA03g008060.3.5C;BraA03g049120.3.5C;BraA05g016410.3.5C;BraA06g044820.3.5C;BraA10g001380.3.5C	8	up&down	Biological Process
GO:0006749	glutathione metabolic process	0.0068	0.0038	1.82	0.00472582	0.367212	BraA02g007020.3.5C;BraA02g047370.3.5C;BraA04g022320.3.5C;BraA05g014980.3.5C;BraA06g007270.3.5C;BraA06g013020.3.5C;BraA06g013030.3.5C;BraA06g013040.3.5C;BraA06g031710.3.5C;BraA07g013980.3.5C;BraA07g014120.3.5C;BraA07g027620.3.5C;BraA07g027630.3.5C;BraA07g027640.3.5C;BraA08g036010.3.5C;BraA09g001710.3.5C;BraA09g040700.3.5C;BraA09g067280.3.5C;BraA10g001520.3.5C;BraA10g022830.3.5C	20	up&down	Biological Process
GO:0000727	double-strand break repair via break-induced replication	0.002	0.0006	3.27	0.00512537	0.375501	BraA01g019660.3.5C;BraA02g033860.3.5C;BraA03g029730.3.5C;BraA03g042610.3.5C;BraA06g036380.3.5C;BraA08g005860.3.5C	6	up	Biological Process
GO:0042762	regulation of sulfur metabolic process	0.002	0.0006	3.27	0.00512537	0.375501	BraA02g041570.3.5C;BraA06g036570.3.5C;BraA07g034180.3.5C;BraA08g035210.3.5C;BraA09g004540.3.5C;BraA10g003170.3.5C	6	up&down	Biological Process
GO:0006220	pyrimidine nucleotide metabolic process	0.0017	0.0005	3.63	0.00613523	0.377456	BraA02g026840.3.5C;BraA02g029690.3.5C;BraA07g044010.3.5C;BraA08g000450.3.5C;BraA09g028640.3.5C	5	up	Biological Process
GO:0031222	arabinan catabolic process	0.0017	0.0005	3.63	0.00613523	0.377456	BraA02g046530.3.5C;BraA06g036130.3.5C;BraA07g042160.3.5C;BraA09g008480.3.5C;BraA10g001330.3.5C	5	up&down	Biological Process
GO:0045493	xylan catabolic process	0.0017	0.0005	3.63	0.00613523	0.377456	BraA02g046530.3.5C;BraA06g036130.3.5C;BraA07g042160.3.5C;BraA09g008480.3.5C;BraA10g001330.3.5C	5	up&down	Biological Process
GO:0006241	CTP biosynthetic process	0.0024	0.0008	2.86	0.00623059	0.377456	BraA01g039940.3.5C;BraA02g029690.3.5C;BraA03g050030.3.5C;BraA05g010140.3.5C;BraA08g000450.3.5C;BraA08g029860.3.5C;BraA09g028640.3.5C	7	up&down	Biological Process
GO:0051346	negative regulation of hydrolase activity	0.0024	0.0008	2.86	0.00623059	0.377456	BraA03g019980.3.5C;BraA04g028310.3.5C;BraA07g009060.3.5C;BraA08g013180.3.5C;BraA09g032200.3.5C;BraA10g000560.3.5C;BraA10g013760.3.5C	7	up&down	Biological Process
GO:0006267	pre-replicative complex assembly involved in nuclear cell cycle DNA replication	0.0014	0.0003	4.36	0.00632968	0.377456	BraA02g033860.3.5C;BraA03g029730.3.5C;BraA03g042610.3.5C;BraA08g005860.3.5C	4	up	Biological Process
GO:0044786	cell cycle DNA replication	0.0014	0.0003	4.36	0.00632968	0.377456	BraA03g062120.3.5C;BraA07g041770.3.5C;BraA09g043090.3.5C;Brassica_rapa_newGene_3108	4	up&down	Biological Process
GO:0071163	DNA replication preinitiation complex assembly	0.0014	0.0003	4.36	0.00632968	0.377456	BraA03g016590.3.5C;BraA05g013700.3.5C;BraA07g041770.3.5C;BraAnng000140.3.5C	4	up	Biological Process
GO:0009755	hormone-mediated signaling pathway	0.0126	0.0085	1.49	0.00708237	0.412743	BraA01g011390.3.5C;BraA01g034280.3.5C;BraA02g003510.3.5C;BraA02g023240.3.5C;BraA02g025310.3.5C;BraA02g042960.3.5C;BraA02g042970.3.5C;BraA03g017510.3.5C;BraA03g019980.3.5C;BraA03g022200.3.5C;BraA03g028460.3.5C;BraA03g030180.3.5C;BraA03g044900.3.5C;BraA03g045200.3.5C;BraA04g018400.3.5C;BraA04g028310.3.5C;BraA05g002570.3.5C;BraA05g012990.3.5C;BraA05g027830.3.5C;BraA05g034850.3.5C;BraA06g034570.3.5C;…	37	up&down	Biological Process
GO:1901701	cellular response to oxygen-containing compound	0.0106	0.0068	1.55	0.0076747	0.430136	BraA01g030190.3.5C;BraA01g034280.3.5C;BraA02g003510.3.5C;BraA02g006560.3.5C;BraA02g023240.3.5C;BraA02g042960.3.5C;BraA02g042970.3.5C;BraA03g005790.3.5C;BraA03g017510.3.5C;BraA03g019980.3.5C;BraA03g022200.3.5C;BraA03g028460.3.5C;BraA04g018400.3.5C;BraA04g020840.3.5C;BraA04g028310.3.5C;BraA05g002570.3.5C;BraA05g012990.3.5C;BraA05g027830.3.5C;BraA05g042530.3.5C;BraA06g034570.3.5C;BraA07g043290.3.5C;…	31	up&down	Biological Process
GO:0042546	cell wall biogenesis	0.0068	0.0039	1.74	0.00771631	0.430136	BraA01g007440.3.5C;BraA01g007450.3.5C;BraA01g007460.3.5C;BraA01g016610.3.5C;BraA02g036400.3.5C;BraA03g019070.3.5C;BraA03g029050.3.5C;BraA03g042660.3.5C;BraA03g056660.3.5C;BraA03g056670.3.5C;BraA03g062320.3.5C;BraA04g014580.3.5C;BraA04g027340.3.5C;BraA05g008420.3.5C;BraA06g041500.3.5C;BraA08g032640.3.5C;BraA09g060980.3.5C;BraA09g061480.3.5C;BraA10g025120.3.5C;BraA10g025220.3.5C	20	up&down	Biological Process
GO:0009638	phototropism	0.002	0.0007	3.02	0.00829705	0.444773	BraA03g016210.3.5C;BraA05g014070.3.5C;BraA06g010380.3.5C;BraA07g036660.3.5C;BraA09g024640.3.5C;BraA10g032090.3.5C	6	down	Biological Process
GO:0006629	lipid metabolic process	0.0167	0.012	1.4	0.00832581	0.444773	BraA01g006860.3.5C;BraA01g017510.3.5C;BraA01g025130.3.5C;BraA02g001800.3.5C;BraA02g012090.3.5C;BraA02g017720.3.5C;BraA02g017770.3.5C;BraA02g027990.3.5C;BraA03g006610.3.5C;BraA03g013450.3.5C;BraA03g019890.3.5C;BraA03g049700.3.5C;BraA03g061750.3.5C;BraA03g065410.3.5C;BraA04g001340.3.5C;BraA04g004130.3.5C;BraA04g022950.3.5C;BraA05g008680.3.5C;BraA05g033860.3.5C;BraA05g042960.3.5C;BraA06g003870.3.5C;…	49	up&down	Biological Process
GO:0009089	lysine biosynthetic process via diaminopimelate	0.0024	0.0009	2.69	0.00921074	0.479482	BraA02g013950.3.5C;BraA03g023290.3.5C;BraA04g032480.3.5C;BraA04g032660.3.5C;BraA05g005140.3.5C;BraA08g030610.3.5C;BraA09g046520.3.5C	7	up	Biological Process
GO:0031400	negative regulation of protein modification process	0.0027	0.0011	2.49	0.0093495	0.479482	BraA03g019980.3.5C;BraA03g044670.3.5C;BraA04g028310.3.5C;BraA07g009060.3.5C;BraA08g013180.3.5C;BraA09g032200.3.5C;BraA10g000560.3.5C;BraA10g013760.3.5C	8	up&down	Biological Process
GO:0071495	cellular response to endogenous stimulus	0.0123	0.0084	1.47	0.00994187	0.499863	BraA01g030190.3.5C;BraA01g034280.3.5C;BraA02g003510.3.5C;BraA02g023240.3.5C;BraA02g025310.3.5C;BraA02g042960.3.5C;BraA02g042970.3.5C;BraA03g005790.3.5C;BraA03g010710.3.5C;BraA03g017510.3.5C;BraA03g019980.3.5C;BraA03g022200.3.5C;BraA03g028460.3.5C;BraA03g030180.3.5C;BraA03g030690.3.5C;BraA04g018400.3.5C;BraA04g020840.3.5C;BraA04g028310.3.5C;BraA05g002570.3.5C;BraA05g012990.3.5C;BraA05g027830.3.5C;…	36	up&down	Biological Process
GO:0046323	glucose import	0.0048	0.0025	1.91	0.0106571	0.509451	BraA01g035340.3.5C;BraA02g042410.3.5C;BraA02g042440.3.5C;BraA03g032860.3.5C;BraA03g047500.3.5C;BraA03g061370.3.5C;BraA06g006030.3.5C;BraA07g039950.3.5C;BraA08g008350.3.5C;BraA09g002270.3.5C;BraA09g005700.3.5C;BraA09g011830.3.5C;BraA09g026530.3.5C;BraA09g063250.3.5C	14	up&down	Biological Process
GO:0032870	cellular response to hormone stimulus	0.0116	0.0079	1.47	0.0118424	0.509451	BraA01g030190.3.5C;BraA01g034280.3.5C;BraA02g003510.3.5C;BraA02g023240.3.5C;BraA02g025310.3.5C;BraA02g042960.3.5C;BraA02g042970.3.5C;BraA03g005790.3.5C;BraA03g017510.3.5C;BraA03g019980.3.5C;BraA03g022200.3.5C;BraA03g028460.3.5C;BraA03g030180.3.5C;BraA04g018400.3.5C;BraA04g020840.3.5C;BraA04g028310.3.5C;BraA05g002570.3.5C;BraA05g012990.3.5C;BraA05g027830.3.5C;BraA06g034570.3.5C;BraA07g042220.3.5C;…	34	up&down	Biological Process
GO:0009768	photosynthesis, light harvesting in photosystem I	0.002	0.0007	2.8	0.0126635	0.509451	BraA01g029970.3.5C;BraA02g000200.3.5C;BraA02g014370.3.5C;BraA07g025470.3.5C;BraA08g005690.3.5C;BraA08g030320.3.5C	6	up&down	Biological Process
GO:0043255	regulation of carbohydrate biosynthetic process	0.002	0.0007	2.8	0.0126635	0.509451	BraA02g041570.3.5C;BraA04g012980.3.5C;BraA06g036570.3.5C;BraA08g035210.3.5C;BraA09g004540.3.5C;BraA10g003170.3.5C	6	up&down	Biological Process
GO:0045132	meiotic chromosome segregation	0.002	0.0007	2.8	0.0126635	0.509451	BraA01g041490.3.5C;BraA03g001600.3.5C;BraA03g057580.3.5C;BraA07g027720.3.5C;BraA09g063540.3.5C;Brassica_rapa_newGene_489	6	up&down	Biological Process
GO:0009220	pyrimidine ribonucleotide biosynthetic process	0.001	0.0002	4.9	0.0126772	0.509451	BraA02g026840.3.5C;BraA07g044010.3.5C;BraA09g006780.3.5C	3	up	Biological Process
GO:0010223	secondary shoot formation	0.001	0.0002	4.9	0.0126772	0.509451	BraA01g044500.3.5C;BraA05g043370.3.5C;BraA09g067100.3.5C	3	up&down	Biological Process
GO:0010541	acropetal auxin transport	0.001	0.0002	4.9	0.0126772	0.509451	BraA02g025310.3.5C;BraA07g042220.3.5C;BraA09g042600.3.5C	3	down	Biological Process
GO:0033388	putrescine biosynthetic process from arginine	0.001	0.0002	4.9	0.0126772	0.509451	BraA01g003590.3.5C;BraA01g003600.3.5C;BraA10g029460.3.5C	3	down	Biological Process
GO:0048768	root hair cell tip growth	0.001	0.0002	4.9	0.0126772	0.509451	BraA03g059980.3.5C;BraA04g001860.3.5C;BraA08g016300.3.5C	3	up&down	Biological Process
GO:0009606	tropism	0.0027	0.0011	2.38	0.0127563	0.509451	BraA02g018830.3.5C;BraA02g030550.3.5C;BraA03g016210.3.5C;BraA05g014070.3.5C;BraA06g030310.3.5C;BraA07g016960.3.5C;BraA07g036660.3.5C;BraA09g009180.3.5C	8	up&down	Biological Process
GO:0009800	cinnamic acid biosynthetic process	0.0014	0.0004	3.73	0.0129845	0.509451	BraA04g006770.3.5C;BraA04g027460.3.5C;BraA05g008230.3.5C;BraA09g046240.3.5C	4	up	Biological Process
GO:0030174	regulation of DNA-dependent DNA replication initiation	0.0014	0.0004	3.73	0.0129845	0.509451	BraA03g016590.3.5C;BraA05g013700.3.5C;BraA07g041770.3.5C;BraAnng000140.3.5C	4	up	Biological Process
GO:0051209	release of sequestered calcium ion into cytosol	0.0014	0.0004	3.73	0.0129845	0.509451	BraA02g011710.3.5C;BraA04g009100.3.5C;BraA05g015350.3.5C;BraA10g016720.3.5C	4	up&down	Biological Process
GO:0043455	regulation of secondary metabolic process	0.0024	0.0009	2.54	0.0131127	0.509451	BraA02g041570.3.5C;BraA06g011620.3.5C;BraA06g036570.3.5C;BraA07g043980.3.5C;BraA08g035210.3.5C;BraA09g004540.3.5C;BraA10g003170.3.5C	7	up&down	Biological Process
GO:0032269	negative regulation of cellular protein metabolic process	0.0031	0.0014	2.18	0.0155894	0.575439	BraA03g019980.3.5C;BraA03g044670.3.5C;BraA04g028310.3.5C;BraA05g005100.3.5C;BraA07g009060.3.5C;BraA08g013180.3.5C;BraA09g032200.3.5C;BraA10g000560.3.5C;BraA10g013760.3.5C	9	up&down	Biological Process
GO:0005986	sucrose biosynthetic process	0.0017	0.0006	2.97	0.0172295	0.575439	BraA04g004680.3.5C;BraA04g005950.3.5C;BraA04g026670.3.5C;BraA05g018770.3.5C;BraA08g002960.3.5C	5	up&down	Biological Process
GO:0009440	cyanate catabolic process	0.0017	0.0006	2.97	0.0172295	0.575439	BraA01g027870.3.5C;BraA02g020390.3.5C;BraA05g041700.3.5C;BraA06g004890.3.5C;BraA06g004900.3.5C	5	up&down	Biological Process
GO:0071310	cellular response to organic substance	0.0137	0.0098	1.39	0.017361	0.575439	BraA01g030190.3.5C;BraA01g034280.3.5C;BraA01g037970.3.5C;BraA02g003510.3.5C;BraA02g023240.3.5C;BraA02g025310.3.5C;BraA02g042960.3.5C;BraA02g042970.3.5C;BraA03g005790.3.5C;BraA03g010710.3.5C;BraA03g017510.3.5C;BraA03g019980.3.5C;BraA03g022200.3.5C;BraA03g028460.3.5C;BraA03g030180.3.5C;BraA03g030690.3.5C;BraA04g018400.3.5C;BraA04g020840.3.5C;BraA04g028310.3.5C;BraA05g002570.3.5C;BraA05g012990.3.5C;…	40	up&down	Biological Process
GO:0003333	amino acid transmembrane transport	0.0048	0.0027	1.79	0.0183387	0.575439	BraA02g008330.3.5C;BraA02g040820.3.5C;BraA02g046160.3.5C;BraA03g021160.3.5C;BraA05g002050.3.5C;BraA06g037460.3.5C;BraA07g021080.3.5C;BraA07g041800.3.5C;BraA08g033860.3.5C;BraA09g004150.3.5C;BraA09g006550.3.5C;BraA09g057550.3.5C;BraA10g031020.3.5C;BraA10g033430.3.5C	14	up&down	Biological Process
GO:0009826	unidimensional cell growth	0.0055	0.0032	1.71	0.0188319	0.575439	BraA02g002300.3.5C;BraA02g021530.3.5C;BraA03g002930.3.5C;BraA03g042510.3.5C;BraA03g059520.3.5C;BraA03g059980.3.5C;BraA04g001860.3.5C;BraA04g029080.3.5C;BraA04g031700.3.5C;BraA06g035690.3.5C;BraA07g013700.3.5C;BraA07g023750.3.5C;BraA07g030290.3.5C;BraA08g016300.3.5C;BraA08g026480.3.5C;BraA10g030000.3.5C	16	up&down	Biological Process
GO:0051248	negative regulation of protein metabolic process	0.0031	0.0015	2.1	0.0199278	0.575439	BraA03g019980.3.5C;BraA03g044670.3.5C;BraA04g028310.3.5C;BraA05g005100.3.5C;BraA07g009060.3.5C;BraA08g013180.3.5C;BraA09g032200.3.5C;BraA10g000560.3.5C;BraA10g013760.3.5C	9	up&down	Biological Process
GO:0071229	cellular response to acid chemical	0.0085	0.0057	1.5	0.0225297	0.575439	BraA01g030190.3.5C;BraA01g034280.3.5C;BraA02g023240.3.5C;BraA02g042960.3.5C;BraA02g042970.3.5C;BraA03g005790.3.5C;BraA03g017510.3.5C;BraA03g019980.3.5C;BraA03g022200.3.5C;BraA04g018400.3.5C;BraA04g028310.3.5C;BraA05g002570.3.5C;BraA05g012990.3.5C;BraA05g027830.3.5C;BraA06g034570.3.5C;BraA07g043290.3.5C;BraA08g013180.3.5C;BraA09g000390.3.5C;BraA09g001060.3.5C;BraA09g005720.3.5C;BraA09g036870.3.5C;…	25	up&down	Biological Process
GO:0000712	resolution of meiotic recombination intermediates	0.0014	0.0004	3.27	0.0228501	0.575439	BraA01g008570.3.5C;BraA04g014630.3.5C;BraA05g038570.3.5C;BraA09g008060.3.5C	4	up&down	Biological Process
GO:0006168	adenine salvage	0.0014	0.0004	3.27	0.0228501	0.575439	BraA07g037320.3.5C;BraA07g044160.3.5C;BraA08g025400.3.5C;BraA09g038670.3.5C	4	up&down	Biological Process
GO:0006228	UTP biosynthetic process	0.0014	0.0004	3.27	0.0228501	0.575439	BraA02g029690.3.5C;BraA08g000450.3.5C;BraA08g029860.3.5C;BraA09g028640.3.5C	4	up	Biological Process
GO:0006598	polyamine catabolic process	0.0014	0.0004	3.27	0.0228501	0.575439	BraA03g005930.3.5C;BraA03g022610.3.5C;BraA05g003330.3.5C;BraA09g046110.3.5C	4	up&down	Biological Process
GO:0009767	photosynthetic electron transport chain	0.0014	0.0004	3.27	0.0228501	0.575439	BraA03g030230.3.5C;BraA03g052410.3.5C;BraA05g041750.3.5C;BraA06g012020.3.5C	4	up&down	Biological Process
GO:0019441	tryptophan catabolic process to kynurenine	0.0014	0.0004	3.27	0.0228501	0.575439	BraA03g021130.3.5C;BraA03g021140.3.5C;BraA04g029260.3.5C;BraA05g006020.3.5C	4	up&down	Biological Process
GO:0070919	production of siRNA involved in chromatin silencing by small RNA	0.0014	0.0004	3.27	0.0228501	0.575439	BraA01g023930.3.5C;BraA07g000870.3.5C;BraA09g028460.3.5C;BraA10g017890.3.5C	4	up&down	Biological Process
GO:0000388	spliceosome conformational change to release U4 (or U4atac) and U1 (or U11)	0.0007	0.0001	6.54	0.0234079	0.575439	BraA02g026180.3.5C;BraA07g015640.3.5C	2	up	Biological Process
GO:0002239	response to oomycetes	0.0007	0.0001	6.54	0.0234079	0.575439	BraA03g030970.3.5C;BraA10g031160.3.5C	2	up&down	Biological Process
GO:0009129	pyrimidine nucleoside monophosphate metabolic process	0.0007	0.0001	6.54	0.0234079	0.575439	BraA02g026840.3.5C;BraA07g044010.3.5C	2	up	Biological Process
GO:0009130	pyrimidine nucleoside monophosphate biosynthetic process	0.0007	0.0001	6.54	0.0234079	0.575439	BraA02g026840.3.5C;BraA07g044010.3.5C	2	up	Biological Process
GO:0009173	pyrimidine ribonucleoside monophosphate metabolic process	0.0007	0.0001	6.54	0.0234079	0.575439	BraA02g026840.3.5C;BraA07g044010.3.5C	2	up	Biological Process
GO:0009174	pyrimidine ribonucleoside monophosphate biosynthetic process	0.0007	0.0001	6.54	0.0234079	0.575439	BraA02g026840.3.5C;BraA07g044010.3.5C	2	up	Biological Process
GO:0009218	pyrimidine ribonucleotide metabolic process	0.0007	0.0001	6.54	0.0234079	0.575439	BraA02g026840.3.5C;BraA07g044010.3.5C	2	up	Biological Process
GO:0009750	response to fructose	0.0007	0.0001	6.54	0.0234079	0.575439	BraA02g023240.3.5C;BraA09g037900.3.5C	2	down	Biological Process
GO:0010204	defense response signaling pathway, resistance gene-independent	0.0007	0.0001	6.54	0.0234079	0.575439	BraA03g028460.3.5C;BraA10g026460.3.5C	2	up&down	Biological Process
GO:0019877	diaminopimelate biosynthetic process	0.0007	0.0001	6.54	0.0234079	0.575439	BraA03g023290.3.5C;BraA04g032480.3.5C	2	up	Biological Process
GO:0036071	N-glycan fucosylation	0.0007	0.0001	6.54	0.0234079	0.575439	BraA06g035920.3.5C;BraA09g004880.3.5C	2	down	Biological Process
GO:0042126	nitrate metabolic process	0.0007	0.0001	6.54	0.0234079	0.575439	BraA01g014810.3.5C;BraA03g052480.3.5C	2	down	Biological Process
GO:0043097	pyrimidine nucleoside salvage	0.0007	0.0001	6.54	0.0234079	0.575439	BraA02g026840.3.5C;BraA07g044010.3.5C	2	up	Biological Process
GO:0043174	nucleoside salvage	0.0007	0.0001	6.54	0.0234079	0.575439	BraA02g026840.3.5C;BraA07g044010.3.5C	2	up	Biological Process
GO:0045637	regulation of myeloid cell differentiation	0.0007	0.0001	6.54	0.0234079	0.575439	BraA04g020840.3.5C;BraA05g040590.3.5C	2	down	Biological Process
GO:0046049	UMP metabolic process	0.0007	0.0001	6.54	0.0234079	0.575439	BraA02g026840.3.5C;BraA07g044010.3.5C	2	up	Biological Process
GO:0046132	pyrimidine ribonucleoside biosynthetic process	0.0007	0.0001	6.54	0.0234079	0.575439	BraA02g026840.3.5C;BraA07g044010.3.5C	2	up	Biological Process
GO:0046134	pyrimidine nucleoside biosynthetic process	0.0007	0.0001	6.54	0.0234079	0.575439	BraA02g026840.3.5C;BraA07g044010.3.5C	2	up	Biological Process
GO:0048254	snoRNA localization	0.0007	0.0001	6.54	0.0234079	0.575439	BraA06g004310.3.5C;BraA08g035130.3.5C	2	up	Biological Process
GO:0060860	regulation of floral organ abscission	0.0007	0.0001	6.54	0.0234079	0.575439	BraA02g012580.3.5C;BraA03g012370.3.5C	2	down	Biological Process
GO:0060862	negative regulation of floral organ abscission	0.0007	0.0001	6.54	0.0234079	0.575439	BraA02g012580.3.5C;BraA03g012370.3.5C	2	down	Biological Process
GO:0071941	nitrogen cycle metabolic process	0.0007	0.0001	6.54	0.0234079	0.575439	BraA01g014810.3.5C;BraA03g052480.3.5C	2	down	Biological Process
GO:2001057	reactive nitrogen species metabolic process	0.0007	0.0001	6.54	0.0234079	0.575439	BraA01g014810.3.5C;BraA03g052480.3.5C	2	down	Biological Process
GO:0009738	abscisic acid-activated signaling pathway	0.0038	0.002	1.89	0.0235632	0.575439	BraA02g015200.3.5C;BraA03g014650.3.5C;BraA03g019980.3.5C;BraA03g030210.3.5C;BraA03g048410.3.5C;BraA04g028310.3.5C;BraA07g014060.3.5C;BraA07g014330.3.5C;BraA07g025600.3.5C;BraA08g013180.3.5C;BraA10g000560.3.5C	11	up&down	Biological Process
GO:0009850	auxin metabolic process	0.002	0.0008	2.45	0.02573	0.614348	BraA02g005470.3.5C;BraA03g012870.3.5C;BraA05g041640.3.5C;BraA06g002470.3.5C;BraA07g043290.3.5C;BraA09g036870.3.5C	6	up&down	Biological Process
GO:0010675	regulation of cellular carbohydrate metabolic process	0.002	0.0008	2.45	0.02573	0.614348	BraA02g041570.3.5C;BraA04g012980.3.5C;BraA06g036570.3.5C;BraA08g035210.3.5C;BraA09g004540.3.5C;BraA10g003170.3.5C	6	up&down	Biological Process
GO:0006857	oligopeptide transport	0.0017	0.0006	2.72	0.0258752	0.614348	BraA02g018670.3.5C;BraA03g019720.3.5C;BraA05g007540.3.5C;BraA07g018330.3.5C;BraA08g031740.3.5C	5	up&down	Biological Process
GO:0006952	defense response	0.0215	0.017	1.27	0.0262291	0.617036	BraA01g000110.3.5C;BraA01g006060.3.5C;BraA01g029980.3.5C;BraA01g036600.3.5C;BraA02g003510.3.5C;BraA02g020820.3.5C;BraA02g027910.3.5C;BraA02g036590.3.5C;BraA03g000140.3.5C;BraA03g000150.3.5C;BraA03g004420.3.5C;BraA03g005790.3.5C;BraA03g017310.3.5C;BraA03g020690.3.5C;BraA03g021130.3.5C;BraA03g021140.3.5C;BraA03g028460.3.5C;BraA03g030230.3.5C;BraA04g028730.3.5C;BraA04g029260.3.5C;BraA04g031390.3.5C;…	63	up&down	Biological Process
GO:0006527	arginine catabolic process	0.001	0.0003	3.92	0.0280902	0.642445	BraA01g003590.3.5C;BraA01g003600.3.5C;BraA10g029460.3.5C	3	down	Biological Process
GO:0090376	seed trichome differentiation	0.001	0.0003	3.92	0.0280902	0.642445	BraA04g029080.3.5C;BraA07g013700.3.5C;BraA08g026480.3.5C	3	down	Biological Process
GO:0090378	seed trichome elongation	0.001	0.0003	3.92	0.0280902	0.642445	BraA04g029080.3.5C;BraA07g013700.3.5C;BraA08g026480.3.5C	3	down	Biological Process
GO:0009637	response to blue light	0.0027	0.0013	2.09	0.0283114	0.642445	BraA01g003750.3.5C;BraA03g016210.3.5C;BraA04g011540.3.5C;BraA05g014070.3.5C;BraA06g035690.3.5C;BraA07g036660.3.5C;BraA08g016320.3.5C;BraA09g009590.3.5C	8	up&down	Biological Process
GO:0030244	cellulose biosynthetic process	0.0044	0.0026	1.73	0.0295661	0.661556	BraA01g000410.3.5C;BraA01g045110.3.5C;BraA02g007160.3.5C;BraA03g004120.3.5C;BraA03g008060.3.5C;BraA03g049120.3.5C;BraA04g024550.3.5C;BraA04g024560.3.5C;BraA05g016400.3.5C;BraA05g016410.3.5C;BraA06g027430.3.5C;BraA06g044820.3.5C;BraA10g001380.3.5C	13	up&down	Biological Process
GO:0009734	auxin-activated signaling pathway	0.0109	0.0078	1.39	0.0296695	0.661556	BraA02g019570.3.5C;BraA02g022620.3.5C;BraA02g032060.3.5C;BraA02g035860.3.5C;BraA02g047210.3.5C;BraA03g005220.3.5C;BraA03g037480.3.5C;BraA06g001810.3.5C;BraA06g002370.3.5C;BraA06g009920.3.5C;BraA06g015040.3.5C;BraA06g015770.3.5C;BraA06g019880.3.5C;BraA07g016660.3.5C;BraA07g019410.3.5C;BraA07g035160.3.5C;BraA07g038670.3.5C;BraA07g041570.3.5C;BraA08g001130.3.5C;BraA08g011020.3.5C;BraA08g028680.3.5C;…	32	up&down	Biological Process
GO:0006109	regulation of carbohydrate metabolic process	0.0024	0.0011	2.18	0.0316421	0.687602	BraA02g041570.3.5C;BraA04g012980.3.5C;BraA04g024720.3.5C;BraA06g036570.3.5C;BraA08g035210.3.5C;BraA09g004540.3.5C;BraA10g003170.3.5C	7	up&down	Biological Process
GO:0009627	systemic acquired resistance	0.0024	0.0011	2.18	0.0316421	0.687602	BraA02g041340.3.5C;BraA03g013460.3.5C;BraA04g006230.3.5C;BraA05g007550.3.5C;BraA05g029350.3.5C;BraA10g013660.3.5C;BraA10g028770.3.5C	7	up&down	Biological Process
GO:0035303	regulation of dephosphorylation	0.0024	0.0011	2.18	0.0316421	0.687602	BraA03g019980.3.5C;BraA04g028310.3.5C;BraA07g009060.3.5C;BraA08g013180.3.5C;BraA09g032200.3.5C;BraA10g000560.3.5C;BraA10g013760.3.5C	7	up&down	Biological Process
GO:0008643	carbohydrate transport	0.0034	0.0018	1.87	0.0328865	0.696552	BraA01g024460.3.5C;BraA03g005710.3.5C;BraA03g047130.3.5C;BraA05g033420.3.5C;BraA05g033440.3.5C;BraA06g017360.3.5C;BraA06g025690.3.5C;BraA06g032300.3.5C;BraA08g027920.3.5C;BraA10g025650.3.5C	10	up&down	Biological Process
GO:0000724	double-strand break repair via homologous recombination	0.0055	0.0034	1.61	0.0332653	0.696552	BraA01g004360.3.5C;BraA02g009540.3.5C;BraA03g000230.3.5C;BraA03g043040.3.5C;BraA03g049290.3.5C;BraA04g007720.3.5C;BraA04g014630.3.5C;BraA04g019080.3.5C;BraA05g015680.3.5C;BraA06g037280.3.5C;BraA07g001330.3.5C;BraA07g012350.3.5C;BraA09g006940.3.5C;BraA09g008060.3.5C;BraA09g022170.3.5C;BraA09g066800.3.5C	16	up&down	Biological Process
GO:0006091	generation of precursor metabolites and energy	0.002	0.0009	2.31	0.0347404	0.696552	BraA03g030230.3.5C;BraA03g040030.3.5C;BraA05g010160.3.5C;BraA06g012020.3.5C;BraA06g039140.3.5C;BraA08g010830.3.5C	6	up	Biological Process
GO:0009686	gibberellin biosynthetic process	0.002	0.0009	2.31	0.0347404	0.696552	BraA02g002300.3.5C;BraA02g026880.3.5C;BraA03g002930.3.5C;BraA03g029320.3.5C;BraA07g043370.3.5C;BraA10g030000.3.5C	6	up&down	Biological Process
GO:0043666	regulation of phosphoprotein phosphatase activity	0.0027	0.0014	2.01	0.0355671	0.696552	BraA01g026160.3.5C;BraA03g019980.3.5C;BraA04g028310.3.5C;BraA07g009060.3.5C;BraA08g013180.3.5C;BraA09g032200.3.5C;BraA10g000560.3.5C;BraA10g013760.3.5C	8	up&down	Biological Process
GO:0055085	transmembrane transport	0.014	0.0106	1.32	0.0356548	0.696552	BraA01g008890.3.5C;BraA01g014900.3.5C;BraA02g004400.3.5C;BraA02g013410.3.5C;BraA02g015500.3.5C;BraA02g022620.3.5C;BraA02g029760.3.5C;BraA02g046450.3.5C;BraA03g013200.3.5C;BraA03g042920.3.5C;BraA03g054960.3.5C;BraA04g005090.3.5C;BraA04g005270.3.5C;BraA04g021760.3.5C;BraA05g000820.3.5C;BraA05g008100.3.5C;BraA05g010360.3.5C;BraA05g014480.3.5C;BraA05g026910.3.5C;BraA05g031860.3.5C;BraA05g038070.3.5C;…	41	up&down	Biological Process
GO:0005975	carbohydrate metabolic process	0.0369	0.0313	1.18	0.0359266	0.696552	BraA01g002340.3.5C;BraA01g006710.3.5C;BraA01g012480.3.5C;BraA01g016960.3.5C;BraA01g017210.3.5C;BraA01g032840.3.5C;BraA01g035920.3.5C;BraA01g035930.3.5C;BraA01g039100.3.5C;BraA01g042020.3.5C;BraA01g043170.3.5C;BraA01g044790.3.5C;BraA01g045290.3.5C;BraA02g002750.3.5C;BraA02g012070.3.5C;BraA02g012700.3.5C;BraA02g012990.3.5C;BraA02g013770.3.5C;BraA02g017190.3.5C;BraA02g017880.3.5C;BraA02g019080.3.5C;…	108	up&down	Biological Process
GO:0006275	regulation of DNA replication	0.0014	0.0005	2.9	0.036222	0.696552	BraA05g014890.3.5C;BraA07g041770.3.5C;BraA09g065210.3.5C;BraA10g025750.3.5C	4	up	Biological Process
GO:0009648	photoperiodism	0.0014	0.0005	2.9	0.036222	0.696552	BraA04g030900.3.5C;BraA05g002730.3.5C;BraA08g029370.3.5C;BraA09g001800.3.5C	4	up&down	Biological Process
GO:0042128	nitrate assimilation	0.0014	0.0005	2.9	0.036222	0.696552	BraA01g014810.3.5C;BraA02g025130.3.5C;BraA03g026430.3.5C;BraA03g052480.3.5C	4	up&down	Biological Process
GO:0048573	photoperiodism, flowering	0.0014	0.0005	2.9	0.036222	0.696552	BraA04g030900.3.5C;BraA05g002730.3.5C;BraA08g029370.3.5C;BraA09g001800.3.5C	4	up&down	Biological Process
GO:0006542	glutamine biosynthetic process	0.0017	0.0007	2.51	0.0368616	0.696552	BraA01g036090.3.5C;BraA02g017450.3.5C;BraA03g038620.3.5C;BraA08g009550.3.5C;BraA09g046110.3.5C	5	up&down	Biological Process
GO:0019856	pyrimidine nucleobase biosynthetic process	0.0017	0.0007	2.51	0.0368616	0.696552	BraA01g013600.3.5C;BraA01g013640.3.5C;BraA01g039940.3.5C;BraA03g050030.3.5C;BraA05g010140.3.5C	5	up&down	Biological Process
GO:0034440	lipid oxidation	0.0017	0.0007	2.51	0.0368616	0.696552	BraA01g026980.3.5C;BraA02g018270.3.5C;BraA07g032230.3.5C;BraA09g054450.3.5C;BraA09g059390.3.5C	5	up&down	Biological Process
GO:1900376	regulation of secondary metabolite biosynthetic process	0.0017	0.0007	2.51	0.0368616	0.696552	BraA02g041570.3.5C;BraA06g036570.3.5C;BraA08g035210.3.5C;BraA09g004540.3.5C;BraA10g003170.3.5C	5	up&down	Biological Process
GO:0120029	hydrogen ion export across plasma membrane	0.0024	0.0011	2.08	0.0404555	0.696552	BraA02g012660.3.5C;BraA02g045690.3.5C;BraA06g022900.3.5C;BraA06g041570.3.5C;BraA08g018730.3.5C;BraA08g029930.3.5C;BraA09g012110.3.5C	7	up&down	Biological Process
GO:0070887	cellular response to chemical stimulus	0.0164	0.013	1.26	0.0481654	0.696552	BraA01g006660.3.5C;BraA01g030190.3.5C;BraA01g034280.3.5C;BraA01g037970.3.5C;BraA02g003510.3.5C;BraA02g006560.3.5C;BraA02g023240.3.5C;BraA02g025310.3.5C;BraA02g042960.3.5C;BraA02g042970.3.5C;BraA03g005790.3.5C;BraA03g006260.3.5C;BraA03g010710.3.5C;BraA03g017510.3.5C;BraA03g019980.3.5C;BraA03g022200.3.5C;BraA03g028460.3.5C;BraA03g030180.3.5C;BraA03g030690.3.5C;BraA03g044670.3.5C;BraA04g018400.3.5C;…	48	up&down	Biological Process
GO:0006221	pyrimidine nucleotide biosynthetic process	0.001	0.0003	3.27	0.0498507	0.696552	BraA02g026840.3.5C;BraA07g044010.3.5C;BraA09g051900.3.5C	3	up&down	Biological Process
GO:0006271	DNA strand elongation involved in DNA replication	0.001	0.0003	3.27	0.0498507	0.696552	BraA02g033860.3.5C;BraA03g029730.3.5C;BraA07g042710.3.5C	3	up	Biological Process
GO:0009112	nucleobase metabolic process	0.001	0.0003	3.27	0.0498507	0.696552	BraA02g026840.3.5C;BraA03g047870.3.5C;BraA07g044010.3.5C	3	up	Biological Process
GO:0009124	nucleoside monophosphate biosynthetic process	0.001	0.0003	3.27	0.0498507	0.696552	BraA02g026840.3.5C;BraA07g044010.3.5C;BraA08g010830.3.5C	3	up	Biological Process
GO:0009772	photosynthetic electron transport in photosystem II	0.001	0.0003	3.27	0.0498507	0.696552	BraA03g030230.3.5C;BraA06g023770.3.5C;BraAnng000580.3.5C	3	up&down	Biological Process
GO:0009911	positive regulation of flower development	0.001	0.0003	3.27	0.0498507	0.696552	BraA01g003750.3.5C;BraA08g016320.3.5C;BraA09g009590.3.5C	3	up&down	Biological Process
GO:0030071	regulation of mitotic metaphase/anaphase transition	0.001	0.0003	3.27	0.0498507	0.696552	BraA05g019470.3.5C;BraA05g032800.3.5C;BraA06g003290.3.5C	3	up	Biological Process
GO:0031930	mitochondria-nucleus signaling pathway	0.001	0.0003	3.27	0.0498507	0.696552	BraA05g013430.3.5C;BraA06g025270.3.5C;BraA07g000430.3.5C	3	up&down	Biological Process
GO:0034285	response to disaccharide	0.001	0.0003	3.27	0.0498507	0.696552	BraA02g023240.3.5C;BraA03g044670.3.5C;BraA09g037900.3.5C	3	down	Biological Process
GO:0034404	nucleobase-containing small molecule biosynthetic process	0.001	0.0003	3.27	0.0498507	0.696552	BraA02g026840.3.5C;BraA07g044010.3.5C;BraA08g010830.3.5C	3	up	Biological Process
GO:0043531	ADP binding	0.0174	0.0089	1.96	5.497e-09	5.61851e-06	BraA01g004810.3.5C;BraA01g010550.3.5C;BraA01g010850.3.5C;BraA01g017980.3.5C;BraA01g037730.3.5C;BraA01g039870.3.5C;BraA01g044510.3.5C;BraA02g007310.3.5C;BraA02g007330.3.5C;BraA02g007720.3.5C;BraA02g007730.3.5C;BraA02g008120.3.5C;BraA02g018860.3.5C;BraA02g022060.3.5C;BraA02g022080.3.5C;BraA02g022090.3.5C;BraA02g034000.3.5C;BraA02g034430.3.5C;BraA03g008930.3.5C;BraA03g016730.3.5C;BraA03g028110.3.5C;…	72	up&down	Molecular Function
GO:0016491	oxidoreductase activity	0.0314	0.0221	1.43	1.26609e-05	0.00647036	BraA01g001050.3.5C;BraA01g001860.3.5C;BraA01g003740.3.5C;BraA01g004910.3.5C;BraA01g006660.3.5C;BraA01g011610.3.5C;BraA01g012740.3.5C;BraA01g013400.3.5C;BraA01g015330.3.5C;BraA01g016120.3.5C;BraA01g016190.3.5C;BraA01g016930.3.5C;BraA01g021470.3.5C;BraA01g023830.3.5C;BraA01g025800.3.5C;BraA01g037850.3.5C;BraA01g038610.3.5C;BraA01g039110.3.5C;BraA01g044520.3.5C;BraA02g001820.3.5C;BraA02g004470.3.5C;…	130	up&down	Molecular Function
GO:0004553	hydrolase activity, hydrolyzing O-glycosyl compounds	0.0169	0.0108	1.57	6.10954e-05	0.0173261	BraA01g006710.3.5C;BraA01g007440.3.5C;BraA01g007450.3.5C;BraA01g007460.3.5C;BraA01g016610.3.5C;BraA01g017210.3.5C;BraA01g032840.3.5C;BraA01g035930.3.5C;BraA01g043170.3.5C;BraA01g044790.3.5C;BraA02g012070.3.5C;BraA02g013770.3.5C;BraA02g017190.3.5C;BraA02g019080.3.5C;BraA02g036400.3.5C;BraA02g041860.3.5C;BraA02g042830.3.5C;BraA02g042850.3.5C;BraA02g043120.3.5C;BraA02g044760.3.5C;BraA02g046530.3.5C;…	70	up&down	Molecular Function
GO:0020037	heme binding	0.0271	0.0191	1.42	6.78054e-05	0.0173261	BraA01g001330.3.5C;BraA01g002330.3.5C;BraA01g002400.3.5C;BraA01g003290.3.5C;BraA01g007540.3.5C;BraA01g011360.3.5C;BraA01g012640.3.5C;BraA01g013300.3.5C;BraA01g021470.3.5C;BraA01g023120.3.5C;BraA01g034440.3.5C;BraA01g038420.3.5C;BraA01g039110.3.5C;BraA01g041410.3.5C;BraA02g001730.3.5C;BraA02g011880.3.5C;BraA02g017940.3.5C;BraA02g022650.3.5C;BraA02g023570.3.5C;BraA02g025130.3.5C;BraA02g027190.3.5C;…	112	up&down	Molecular Function
GO:0016762	xyloglucan:xyloglucosyl transferase activity	0.0046	0.002	2.36	0.000177271	0.036238	BraA01g007440.3.5C;BraA01g007450.3.5C;BraA01g007460.3.5C;BraA01g016610.3.5C;BraA02g036400.3.5C;BraA03g019070.3.5C;BraA03g029050.3.5C;BraA03g042660.3.5C;BraA03g056660.3.5C;BraA03g056670.3.5C;BraA03g062320.3.5C;BraA04g027340.3.5C;BraA05g008420.3.5C;BraA06g041500.3.5C;BraA08g018660.3.5C;BraA08g032640.3.5C;BraA09g060980.3.5C;BraA10g025120.3.5C;BraA10g025220.3.5C	19	up&down	Molecular Function
GO:0016747	transferase activity, transferring acyl groups other than amino-acyl groups	0.0114	0.0069	1.65	0.000273478	0.0406941	BraA01g023430.3.5C;BraA02g000330.3.5C;BraA02g000680.3.5C;BraA02g000690.3.5C;BraA02g001440.3.5C;BraA02g005240.3.5C;BraA02g031350.3.5C;BraA02g031950.3.5C;BraA02g038650.3.5C;BraA02g042260.3.5C;BraA02g044150.3.5C;BraA03g003230.3.5C;BraA03g006050.3.5C;BraA03g012200.3.5C;BraA03g059790.3.5C;BraA04g008840.3.5C;BraA04g014520.3.5C;BraA04g015900.3.5C;BraA04g015910.3.5C;BraA04g015990.3.5C;BraA04g031080.3.5C;…	47	up&down	Molecular Function
GO:0015035	protein disulfide oxidoreductase activity	0.008	0.0044	1.82	0.000327052	0.0406941	BraA01g021150.3.5C;BraA01g033490.3.5C;BraA01g037770.3.5C;BraA02g007870.3.5C;BraA02g009030.3.5C;BraA03g002610.3.5C;BraA03g008680.3.5C;BraA03g037390.3.5C;BraA03g040260.3.5C;BraA03g046930.3.5C;BraA04g000650.3.5C;BraA04g000670.3.5C;BraA04g022940.3.5C;BraA05g014050.3.5C;BraA06g003380.3.5C;BraA06g032050.3.5C;BraA07g000510.3.5C;BraA07g020450.3.5C;BraA07g026170.3.5C;BraA07g026180.3.5C;BraA07g041320.3.5C;…	33	up&down	Molecular Function
GO:0004864	protein phosphatase inhibitor activity	0.0034	0.0013	2.63	0.000338771	0.0406941	BraA02g015200.3.5C;BraA03g014650.3.5C;BraA03g019980.3.5C;BraA03g030210.3.5C;BraA03g048410.3.5C;BraA04g028310.3.5C;BraA07g009060.3.5C;BraA07g014060.3.5C;BraA07g014330.3.5C;BraA07g025600.3.5C;BraA09g008300.3.5C;BraA09g032200.3.5C;BraA10g000560.3.5C;BraA10g013760.3.5C	14	up&down	Molecular Function
GO:0005506	iron ion binding	0.0232	0.0166	1.4	0.000358326	0.0406941	BraA01g002330.3.5C;BraA01g002400.3.5C;BraA01g011360.3.5C;BraA01g013300.3.5C;BraA01g013400.3.5C;BraA01g021470.3.5C;BraA01g023120.3.5C;BraA01g034440.3.5C;BraA01g038420.3.5C;BraA01g039110.3.5C;BraA01g039210.3.5C;BraA02g001180.3.5C;BraA02g009390.3.5C;BraA02g017940.3.5C;BraA02g023570.3.5C;BraA02g027190.3.5C;BraA02g027310.3.5C;BraA02g031140.3.5C;BraA02g032970.3.5C;BraA02g038260.3.5C;BraA02g038270.3.5C;…	96	up&down	Molecular Function
GO:0019783	ubiquitin-like protein-specific protease activity	0.0034	0.0013	2.56	0.000477247	0.0487797	BraA01g034280.3.5C;BraA02g042960.3.5C;BraA02g042970.3.5C;BraA03g017510.3.5C;BraA04g018400.3.5C;BraA05g012990.3.5C;BraA05g027830.3.5C;BraA06g034570.3.5C;BraA09g000390.3.5C;BraA09g001060.3.5C;BraA09g005720.3.5C;BraAnng002740.3.5C;BraAnng004750.3.5C;BraAnng004820.3.5C	14	up&down	Molecular Function
GO:0019203	carbohydrate phosphatase activity	0.001	0.0001	6.57	0.000535842	0.0497897	BraA04g007670.3.5C;BraA05g036920.3.5C;BraA09g045300.3.5C;BraA09g045350.3.5C	4	up	Molecular Function
GO:0008194	UDP-glycosyltransferase activity	0.0092	0.0056	1.64	0.00110911	0.0944689	BraA01g021510.3.5C;BraA01g025520.3.5C;BraA01g033310.3.5C;BraA02g006930.3.5C;BraA02g011110.3.5C;BraA02g025420.3.5C;BraA03g006570.3.5C;BraA03g030260.3.5C;BraA03g046820.3.5C;BraA04g025590.3.5C;BraA04g027300.3.5C;BraA05g003890.3.5C;BraA05g008300.3.5C;BraA05g008330.3.5C;BraA05g008450.3.5C;BraA05g008460.3.5C;BraA05g014710.3.5C;BraA05g014720.3.5C;BraA05g014790.3.5C;BraA05g026190.3.5C;BraA05g026400.3.5C;…	38	up&down	Molecular Function
GO:0016538	cyclin-dependent protein serine/threonine kinase regulator activity	0.0046	0.0022	2.05	0.0013093	0.101711	BraA01g004150.3.5C;BraA02g001940.3.5C;BraA02g007060.3.5C;BraA03g002440.3.5C;BraA03g059660.3.5C;BraA03g060810.3.5C;BraA05g021430.3.5C;BraA05g031550.3.5C;BraA06g010900.3.5C;BraA06g011570.3.5C;BraA06g031510.3.5C;BraA07g017190.3.5C;BraA07g040890.3.5C;BraA08g005440.3.5C;BraA08g005450.3.5C;BraA08g028370.3.5C;BraA08g030620.3.5C;BraA09g060380.3.5C;BraA10g027500.3.5C	19	up&down	Molecular Function
GO:0004032	alditol:NADP+ 1-oxidoreductase activity	0.0015	0.0004	3.94	0.00149267	0.101711	BraA02g045540.3.5C;BraA03g019630.3.5C;BraA05g007620.3.5C;BraA05g007630.3.5C;BraA05g007640.3.5C;BraA09g057360.3.5C	6	up&down	Molecular Function
GO:0008106	alcohol dehydrogenase (NADP+) activity	0.0015	0.0004	3.94	0.00149267	0.101711	BraA02g045540.3.5C;BraA03g019630.3.5C;BraA05g007620.3.5C;BraA05g007630.3.5C;BraA05g007640.3.5C;BraA09g057360.3.5C	6	up&down	Molecular Function
GO:0004497	monooxygenase activity	0.0109	0.0071	1.54	0.00173334	0.106863	BraA01g002330.3.5C;BraA01g002400.3.5C;BraA01g013300.3.5C;BraA01g021470.3.5C;BraA01g023120.3.5C;BraA01g038420.3.5C;BraA01g039110.3.5C;BraA02g017890.3.5C;BraA02g023570.3.5C;BraA02g027310.3.5C;BraA02g031140.3.5C;BraA02g032970.3.5C;BraA02g038260.3.5C;BraA02g038270.3.5C;BraA02g040670.3.5C;BraA03g001720.3.5C;BraA03g028190.3.5C;BraA03g037080.3.5C;BraA03g041980.3.5C;BraA03g061190.3.5C;BraA04g001670.3.5C;…	45	up&down	Molecular Function
GO:0070011	peptidase activity, acting on L-amino acid peptides	0.0039	0.0018	2.15	0.00177738	0.106863	BraA01g000720.3.5C;BraA01g034280.3.5C;BraA02g042960.3.5C;BraA02g042970.3.5C;BraA03g017510.3.5C;BraA04g018400.3.5C;BraA05g012990.3.5C;BraA05g027830.3.5C;BraA06g034570.3.5C;BraA07g032190.3.5C;BraA09g000390.3.5C;BraA09g001060.3.5C;BraA09g005720.3.5C;BraAnng002740.3.5C;BraAnng004750.3.5C;BraAnng004820.3.5C	16	up&down	Molecular Function
GO:0003688	DNA replication origin binding	0.0019	0.0006	3.09	0.00190664	0.108266	BraA02g033860.3.5C;BraA03g029730.3.5C;BraA03g042610.3.5C;BraA03g043040.3.5C;BraA05g037940.3.5C;BraA08g005860.3.5C;BraA09g027080.3.5C;BraA10g005960.3.5C	8	up	Molecular Function
GO:0003700	transcription factor activity, sequence-specific DNA binding	0.0619	0.0526	1.18	0.00228638	0.110661	BraA01g000670.3.5C;BraA01g001210.3.5C;BraA01g001720.3.5C;BraA01g002870.3.5C;BraA01g003690.3.5C;BraA01g003750.3.5C;BraA01g005280.3.5C;BraA01g006160.3.5C;BraA01g006770.3.5C;BraA01g007530.3.5C;BraA01g009140.3.5C;BraA01g009150.3.5C;BraA01g014560.3.5C;BraA01g014810.3.5C;BraA01g018810.3.5C;BraA01g024980.3.5C;BraA01g025510.3.5C;BraA01g025600.3.5C;BraA01g030190.3.5C;BraA01g032550.3.5C;BraA01g034050.3.5C;…	256	up&down	Molecular Function
GO:0004324	ferredoxin-NADP+ reductase activity	0.001	0.0002	5.26	0.00235327	0.110661	BraA07g016530.3.5C;BraA08g028580.3.5C;BraA09g025760.3.5C;BraA09g036040.3.5C	4	up&down	Molecular Function
GO:0010427	abscisic acid binding	0.0024	0.0009	2.63	0.00238153	0.110661	BraA02g015200.3.5C;BraA03g014650.3.5C;BraA03g019980.3.5C;BraA03g030210.3.5C;BraA03g048410.3.5C;BraA04g028310.3.5C;BraA07g014060.3.5C;BraA07g014330.3.5C;BraA07g025600.3.5C;BraA10g000560.3.5C	10	up&down	Molecular Function
GO:0101005	ubiquitinyl hydrolase activity	0.0036	0.0017	2.14	0.00248167	0.110661	BraA01g034280.3.5C;BraA02g042960.3.5C;BraA02g042970.3.5C;BraA03g017510.3.5C;BraA04g018400.3.5C;BraA04g019720.3.5C;BraA05g012990.3.5C;BraA05g027830.3.5C;BraA06g034570.3.5C;BraA09g000390.3.5C;BraA09g001060.3.5C;BraA09g005720.3.5C;BraAnng002740.3.5C;BraAnng004750.3.5C;BraAnng004820.3.5C	15	up&down	Molecular Function
GO:0008422	beta-glucosidase activity	0.0041	0.002	2.03	0.0025237	0.110661	BraA01g012480.3.5C;BraA01g035920.3.5C;BraA01g042020.3.5C;BraA02g030150.3.5C;BraA03g001860.3.5C;BraA03g011760.3.5C;BraA03g011770.3.5C;BraA04g024810.3.5C;BraA05g004380.3.5C;BraA05g004390.3.5C;BraA05g013020.3.5C;BraA05g015320.3.5C;BraA05g018140.3.5C;BraA09g010490.3.5C;BraA09g032880.3.5C;BraA09g053840.3.5C;BraA10g001460.3.5C	17	up&down	Molecular Function
GO:0015333	peptide:proton symporter activity	0.0034	0.0015	2.19	0.00271575	0.110661	BraA02g005770.3.5C;BraA02g019110.3.5C;BraA02g020060.3.5C;BraA06g027450.3.5C;BraA06g035680.3.5C;BraA06g041370.3.5C;BraA07g022220.3.5C;BraA07g030300.3.5C;BraA07g030340.3.5C;BraA07g031710.3.5C;BraA07g035820.3.5C;BraA09g042290.3.5C;BraA09g047000.3.5C;BraA10g024410.3.5C	14	up&down	Molecular Function
GO:1904680	peptide transmembrane transporter activity	0.0034	0.0015	2.19	0.00271575	0.110661	BraA02g005770.3.5C;BraA02g019110.3.5C;BraA02g020060.3.5C;BraA06g027450.3.5C;BraA06g035680.3.5C;BraA06g041370.3.5C;BraA07g022220.3.5C;BraA07g030300.3.5C;BraA07g030340.3.5C;BraA07g031710.3.5C;BraA07g035820.3.5C;BraA09g042290.3.5C;BraA09g047000.3.5C;BraA10g024410.3.5C	14	up&down	Molecular Function
GO:0046982	protein heterodimerization activity	0.0085	0.0053	1.6	0.00282224	0.110661	BraA01g017990.3.5C;BraA01g034150.3.5C;BraA01g037540.3.5C;BraA02g000570.3.5C;BraA02g003470.3.5C;BraA02g010800.3.5C;BraA02g010980.3.5C;BraA02g041190.3.5C;BraA03g003390.3.5C;BraA03g004320.3.5C;BraA03g011160.3.5C;BraA03g020440.3.5C;BraA03g035770.3.5C;BraA04g005760.3.5C;BraA04g006430.3.5C;BraA04g008300.3.5C;BraA05g027460.3.5C;BraA06g004970.3.5C;BraA06g005460.3.5C;BraA06g006050.3.5C;BraA06g021180.3.5C;…	35	up&down	Molecular Function
GO:0046556	alpha-L-arabinofuranosidase activity	0.0019	0.0007	2.92	0.00297728	0.110661	BraA01g041210.3.5C;BraA02g046530.3.5C;BraA03g005570.3.5C;BraA06g036130.3.5C;BraA07g042160.3.5C;BraA09g008480.3.5C;BraA10g001330.3.5C;BraA10g028070.3.5C	8	up&down	Molecular Function
GO:0045548	phenylalanine ammonia-lyase activity	0.0012	0.0003	4.11	0.00304467	0.110661	BraA02g001350.3.5C;BraA04g006770.3.5C;BraA04g027460.3.5C;BraA05g008230.3.5C;BraA09g046240.3.5C	5	up	Molecular Function
GO:0035673	oligopeptide transmembrane transporter activity	0.0036	0.0017	2.1	0.00313977	0.110661	BraA01g018640.3.5C;BraA02g005770.3.5C;BraA02g019110.3.5C;BraA02g020060.3.5C;BraA06g027450.3.5C;BraA06g035680.3.5C;BraA06g041370.3.5C;BraA07g022220.3.5C;BraA07g030300.3.5C;BraA07g030340.3.5C;BraA07g031710.3.5C;BraA07g035820.3.5C;BraA09g042290.3.5C;BraA09g047000.3.5C;BraA10g024410.3.5C	15	up&down	Molecular Function
GO:0016710	trans-cinnamate 4-monooxygenase activity	0.0007	0.0001	6.57	0.00352299	0.120029	BraA03g016180.3.5C;BraA04g022890.3.5C;BraA05g014090.3.5C	3	up&down	Molecular Function
GO:0071949	FAD binding	0.0063	0.0037	1.69	0.00411772	0.135766	BraA01g011610.3.5C;BraA02g004060.3.5C;BraA02g009390.3.5C;BraA02g009630.3.5C;BraA02g013160.3.5C;BraA02g025130.3.5C;BraA03g022040.3.5C;BraA03g050110.3.5C;BraA03g061200.3.5C;BraA04g026010.3.5C;BraA05g001090.3.5C;BraA05g028430.3.5C;BraA06g022570.3.5C;BraA07g010680.3.5C;BraA09g002190.3.5C;BraA09g021320.3.5C;BraA09g021350.3.5C;BraA09g021360.3.5C;BraA09g021370.3.5C;BraA09g021400.3.5C;BraA09g021410.3.5C;…	26	up&down	Molecular Function
GO:0004364	glutathione transferase activity	0.0048	0.0027	1.83	0.00446167	0.142509	BraA02g007020.3.5C;BraA03g049710.3.5C;BraA04g022320.3.5C;BraA05g014980.3.5C;BraA06g007270.3.5C;BraA06g013020.3.5C;BraA06g013030.3.5C;BraA06g013040.3.5C;BraA06g031710.3.5C;BraA07g013980.3.5C;BraA07g014120.3.5C;BraA07g027620.3.5C;BraA07g027630.3.5C;BraA07g027640.3.5C;BraA08g036010.3.5C;BraA09g001710.3.5C;BraA09g040700.3.5C;BraA09g067280.3.5C;BraA10g001520.3.5C;BraA10g022830.3.5C	20	up&down	Molecular Function
GO:0008725	DNA-3-methyladenine glycosylase activity	0.0015	0.0004	3.29	0.00498956	0.14571	BraA02g032590.3.5C;BraA05g035440.3.5C;BraA06g009900.3.5C;BraA07g026980.3.5C;BraA07g043640.3.5C;Brassica_rapa_newGene_1731	6	up&down	Molecular Function
GO:0016759	cellulose synthase activity	0.0015	0.0004	3.29	0.00498956	0.14571	BraA01g000410.3.5C;BraA03g004120.3.5C;BraA03g008060.3.5C;BraA03g049120.3.5C;BraA05g016410.3.5C;BraA06g044820.3.5C	6	up&down	Molecular Function
GO:0019212	phosphatase inhibitor activity	0.0015	0.0004	3.29	0.00498956	0.14571	BraA03g019980.3.5C;BraA04g028310.3.5C;BraA07g009060.3.5C;BraA09g032200.3.5C;BraA10g000560.3.5C;BraA10g013760.3.5C	6	up&down	Molecular Function
GO:0004865	protein serine/threonine phosphatase inhibitor activity	0.0012	0.0003	3.65	0.00599359	0.157079	BraA04g023730.3.5C;BraA05g013560.3.5C;BraA07g009060.3.5C;BraA09g032200.3.5C;BraA10g013760.3.5C	5	up&down	Molecular Function
GO:0008157	protein phosphatase 1 binding	0.0012	0.0003	3.65	0.00599359	0.157079	BraA04g023730.3.5C;BraA05g012040.3.5C;BraA05g013560.3.5C;BraA06g041730.3.5C;BraA10g033080.3.5C	5	up&down	Molecular Function
GO:0009044	xylan 1,4-beta-xylosidase activity	0.0012	0.0003	3.65	0.00599359	0.157079	BraA02g046530.3.5C;BraA06g036130.3.5C;BraA07g042160.3.5C;BraA09g008480.3.5C;BraA10g001330.3.5C	5	up&down	Molecular Function
GO:0016307	phosphatidylinositol phosphate kinase activity	0.0012	0.0003	3.65	0.00599359	0.157079	BraA05g033010.3.5C;BraA06g022010.3.5C;BraA10g004750.3.5C;BraA10g004770.3.5C;BraA10g004800.3.5C	5	up&down	Molecular Function
GO:0008889	glycerophosphodiester phosphodiesterase activity	0.0019	0.0007	2.63	0.0064577	0.165011	BraA01g017510.3.5C;BraA02g017720.3.5C;BraA02g017770.3.5C;BraA03g013450.3.5C;BraA03g019890.3.5C;BraA07g029400.3.5C;BraA07g032470.3.5C;BraA10g030370.3.5C	8	up&down	Molecular Function
GO:0009055	electron carrier activity	0.0131	0.0095	1.38	0.00774266	0.19302	BraA01g006130.3.5C;BraA01g018300.3.5C;BraA01g021150.3.5C;BraA01g033490.3.5C;BraA01g034210.3.5C;BraA01g037770.3.5C;BraA02g007870.3.5C;BraA02g009030.3.5C;BraA02g009390.3.5C;BraA02g021630.3.5C;BraA02g032000.3.5C;BraA02g032700.3.5C;BraA02g042980.3.5C;BraA03g002610.3.5C;BraA03g008680.3.5C;BraA03g025290.3.5C;BraA03g025510.3.5C;BraA03g040260.3.5C;BraA03g046930.3.5C;BraA03g057970.3.5C;BraA04g000650.3.5C;…	54	up&down	Molecular Function
GO:0019208	phosphatase regulator activity	0.0015	0.0005	3.03	0.00808297	0.194467	BraA03g019980.3.5C;BraA04g028310.3.5C;BraA07g009060.3.5C;BraA09g032200.3.5C;BraA10g000560.3.5C;BraA10g013760.3.5C	6	up&down	Molecular Function
GO:0080043	quercetin 3-O-glucosyltransferase activity	0.0034	0.0017	1.96	0.0083715	0.194467	BraA01g025520.3.5C;BraA02g025420.3.5C;BraA03g046820.3.5C;BraA05g026400.3.5C;BraA06g020740.3.5C;BraA07g015180.3.5C;BraA07g015190.3.5C;BraA08g010150.3.5C;BraA08g011750.3.5C;BraA08g027450.3.5C;BraA08g034880.3.5C;BraA09g040970.3.5C;BraA09g042450.3.5C;BraA10g028670.3.5C	14	up&down	Molecular Function
GO:0080044	quercetin 7-O-glucosyltransferase activity	0.0034	0.0017	1.96	0.0083715	0.194467	BraA01g025520.3.5C;BraA02g025420.3.5C;BraA03g046820.3.5C;BraA05g026400.3.5C;BraA06g020740.3.5C;BraA07g015180.3.5C;BraA07g015190.3.5C;BraA08g010150.3.5C;BraA08g011750.3.5C;BraA08g027450.3.5C;BraA08g034880.3.5C;BraA09g040970.3.5C;BraA09g042450.3.5C;BraA10g028670.3.5C	14	up&down	Molecular Function
GO:0003993	acid phosphatase activity	0.0036	0.0019	1.9	0.00890346	0.201311	BraA01g017250.3.5C;BraA01g036110.3.5C;BraA03g043620.3.5C;BraA04g020420.3.5C;BraA04g020430.3.5C;BraA05g039590.3.5C;BraA06g041460.3.5C;BraA06g041470.3.5C;BraA08g019100.3.5C;BraA08g030640.3.5C;BraA09g010830.3.5C;BraA09g021050.3.5C;BraA09g061630.3.5C;BraA09g061830.3.5C;Brassica_rapa_newGene_1630	15	up&down	Molecular Function
GO:0008271	secondary active sulfate transmembrane transporter activity	0.0019	0.0008	2.5	0.00906004	0.201311	BraA02g008440.3.5C;BraA03g009180.3.5C;BraA03g035790.3.5C;BraA07g042110.3.5C;BraA07g042120.3.5C;BraA09g001620.3.5C;BraA09g041740.3.5C;BraA10g027760.3.5C	8	up&down	Molecular Function
GO:0016709	oxidoreductase activity, acting on paired donors, with incorporation or reduction of molecular oxygen, NAD(P)H as one donor, and incorporation of one atom of oxygen	0.008	0.0053	1.51	0.00932554	0.202802	BraA01g011360.3.5C;BraA01g015330.3.5C;BraA01g034440.3.5C;BraA01g039110.3.5C;BraA02g027190.3.5C;BraA02g038290.3.5C;BraA02g038320.3.5C;BraA03g016180.3.5C;BraA03g031710.3.5C;BraA03g039650.3.5C;BraA03g061910.3.5C;BraA03g061920.3.5C;BraA04g001680.3.5C;BraA04g022890.3.5C;BraA04g030160.3.5C;BraA04g030700.3.5C;BraA04g032740.3.5C;BraA04g033350.3.5C;BraA05g001160.3.5C;BraA05g014090.3.5C;BraA05g028120.3.5C;…	33	up&down	Molecular Function
GO:0038023	signaling receptor activity	0.0044	0.0025	1.77	0.00976924	0.208025	BraA01g003100.3.5C;BraA02g008910.3.5C;BraA02g015200.3.5C;BraA03g014650.3.5C;BraA03g019980.3.5C;BraA03g030210.3.5C;BraA03g048410.3.5C;BraA03g062170.3.5C;BraA04g021990.3.5C;BraA04g028310.3.5C;BraA05g012650.3.5C;BraA07g014060.3.5C;BraA07g014330.3.5C;BraA07g025600.3.5C;BraA08g035860.3.5C;BraA09g001250.3.5C;BraA09g055590.3.5C;BraA10g000560.3.5C	18	up&down	Molecular Function
GO:0016168	chlorophyll binding	0.0031	0.0016	1.94	0.0116636	0.232517	BraA01g029970.3.5C;BraA02g000200.3.5C;BraA02g014370.3.5C;BraA05g010630.3.5C;BraA05g010640.3.5C;BraA06g023760.3.5C;BraA06g023770.3.5C;BraA07g025470.3.5C;BraA08g005690.3.5C;BraA08g028970.3.5C;BraA08g030320.3.5C;BraA09g047590.3.5C;BraAnng000580.3.5C	13	up&down	Molecular Function
GO:0008017	microtubule binding	0.0116	0.0084	1.38	0.0120066	0.232517	BraA01g009240.3.5C;BraA01g017570.3.5C;BraA01g026500.3.5C;BraA01g034080.3.5C;BraA02g000730.3.5C;BraA02g002110.3.5C;BraA02g013740.3.5C;BraA02g040920.3.5C;BraA02g044630.3.5C;BraA02g045610.3.5C;BraA03g000990.3.5C;BraA03g006550.3.5C;BraA03g039680.3.5C;BraA03g040580.3.5C;BraA03g044420.3.5C;BraA04g002210.3.5C;BraA04g008280.3.5C;BraA04g020300.3.5C;BraA04g026960.3.5C;BraA05g000380.3.5C;BraA05g009150.3.5C;…	48	up&down	Molecular Function
GO:0000155	phosphorelay sensor kinase activity	0.0019	0.0008	2.39	0.0123702	0.232517	BraA01g031970.3.5C;BraA05g000360.3.5C;BraA06g006520.3.5C;BraA06g041510.3.5C;BraA07g003080.3.5C;BraA07g012680.3.5C;BraA09g064170.3.5C;BraA10g002720.3.5C	8	up&down	Molecular Function
GO:0043295	glutathione binding	0.0019	0.0008	2.39	0.0123702	0.232517	BraA02g007020.3.5C;BraA02g047370.3.5C;BraA06g035380.3.5C;BraA08g036010.3.5C;BraA09g001710.3.5C;BraA09g067280.3.5C;BraA10g001520.3.5C;BraA10g022830.3.5C	8	up&down	Molecular Function
GO:0017112	Rab guanyl-nucleotide exchange factor activity	0.0007	0.0001	4.93	0.0124844	0.232517	BraA01g000720.3.5C;BraA06g003480.3.5C;BraA09g012740.3.5C	3	up&down	Molecular Function
GO:0019840	isoprenoid binding	0.0007	0.0001	4.93	0.0124844	0.232517	BraA03g019980.3.5C;BraA04g028310.3.5C;BraA10g000560.3.5C	3	down	Molecular Function
GO:0004363	glutathione synthase activity	0.001	0.0003	3.75	0.0127393	0.232517	BraA02g047370.3.5C;BraA06g035380.3.5C;BraA10g015030.3.5C;Brassica_rapa_newGene_3104	4	up&down	Molecular Function
GO:0008430	selenium binding	0.001	0.0003	3.75	0.0127393	0.232517	BraA04g008670.3.5C;BraA07g009540.3.5C;BraA08g010070.3.5C;BraA08g010080.3.5C	4	up&down	Molecular Function
GO:0003968	RNA-directed 5'-3' RNA polymerase activity	0.0012	0.0004	2.99	0.0168553	0.300774	BraA01g023930.3.5C;BraA07g000840.3.5C;BraA07g000870.3.5C;BraA09g028460.3.5C;BraA10g017890.3.5C	5	up&down	Molecular Function
GO:0005351	sugar:proton symporter activity	0.0031	0.0017	1.86	0.0170676	0.300774	BraA01g035340.3.5C;BraA02g042410.3.5C;BraA02g042440.3.5C;BraA03g032860.3.5C;BraA03g061370.3.5C;BraA06g006030.3.5C;BraA07g039950.3.5C;BraA08g008350.3.5C;BraA09g002270.3.5C;BraA09g005700.3.5C;BraA09g011830.3.5C;BraA09g026530.3.5C;BraA09g063250.3.5C	13	up&down	Molecular Function
GO:0051753	mannan synthase activity	0.0017	0.0007	2.42	0.0175827	0.3046	BraA01g045110.3.5C;BraA03g007340.3.5C;BraA03g018470.3.5C;BraA07g014040.3.5C;BraA09g048600.3.5C;BraA10g001380.3.5C;BraA10g023520.3.5C	7	up&down	Molecular Function
GO:0015250	water channel activity	0.0015	0.0006	2.63	0.0179679	0.306084	BraA01g019340.3.5C;BraA03g010630.3.5C;BraA03g019290.3.5C;BraA03g060390.3.5C;BraA06g039620.3.5C;BraA09g052800.3.5C	6	up&down	Molecular Function
GO:0008239	dipeptidyl-peptidase activity	0.001	0.0003	3.29	0.022434	0.311443	BraA02g010210.3.5C;BraA04g018850.3.5C;BraA06g030430.3.5C;BraA07g043530.3.5C	4	up&down	Molecular Function
GO:0050307	sucrose-phosphate phosphatase activity	0.001	0.0003	3.29	0.022434	0.311443	BraA04g005950.3.5C;BraA04g026670.3.5C;BraA05g018770.3.5C;BraA08g002960.3.5C	4	up&down	Molecular Function
GO:0000406	double-strand/single-strand DNA junction binding	0.0005	0.0001	6.57	0.0231578	0.311443	BraA03g038860.3.5C;BraA04g007720.3.5C	2	up	Molecular Function
GO:0000703	oxidized pyrimidine nucleobase lesion DNA N-glycosylase activity	0.0005	0.0001	6.57	0.0231578	0.311443	BraA03g016660.3.5C;BraA09g066010.3.5C	2	up&down	Molecular Function
GO:0003868	4-hydroxyphenylpyruvate dioxygenase activity	0.0005	0.0001	6.57	0.0231578	0.311443	BraA09g065660.3.5C;BraA10g005230.3.5C	2	up&down	Molecular Function
GO:0004180	carboxypeptidase activity	0.0005	0.0001	6.57	0.0231578	0.311443	BraA04g005620.3.5C;BraA09g047400.3.5C	2	down	Molecular Function
GO:0016166	phytoene dehydrogenase activity	0.0005	0.0001	6.57	0.0231578	0.311443	BraA04g008500.3.5C;BraA08g023540.3.5C	2	up&down	Molecular Function
GO:0019206	nucleoside kinase activity	0.0005	0.0001	6.57	0.0231578	0.311443	BraA02g026840.3.5C;BraA07g044010.3.5C	2	up	Molecular Function
GO:0019207	kinase regulator activity	0.0005	0.0001	6.57	0.0231578	0.311443	BraA01g024640.3.5C;BraA06g018920.3.5C	2	down	Molecular Function
GO:0035174	histone serine kinase activity	0.0005	0.0001	6.57	0.0231578	0.311443	BraA01g005250.3.5C;BraA08g017330.3.5C	2	up	Molecular Function
GO:0046921	alpha-(1->6)-fucosyltransferase activity	0.0005	0.0001	6.57	0.0231578	0.311443	BraA06g035920.3.5C;BraA09g004880.3.5C	2	down	Molecular Function
GO:0051777	ent-kaurenoate oxidase activity	0.0005	0.0001	6.57	0.0231578	0.311443	BraA05g012570.3.5C;BraA10g003700.3.5C	2	up&down	Molecular Function
GO:0102343	3-hydroxy-arachidoyl-CoA dehydratase activity	0.0005	0.0001	6.57	0.0231578	0.311443	BraA02g010910.3.5C;BraA10g027470.3.5C	2	up&down	Molecular Function
GO:0102344	3-hydroxy-behenoyl-CoA dehydratase activity	0.0005	0.0001	6.57	0.0231578	0.311443	BraA02g010910.3.5C;BraA10g027470.3.5C	2	up&down	Molecular Function
GO:0102345	3-hydroxy-lignoceroyl-CoA dehydratase activity	0.0005	0.0001	6.57	0.0231578	0.311443	BraA02g010910.3.5C;BraA10g027470.3.5C	2	up&down	Molecular Function
GO:0106019	phosphatidylinositol-4,5-bisphosphate phosphatase activity	0.0005	0.0001	6.57	0.0231578	0.311443	BraA05g008680.3.5C;Brassica_rapa_newGene_600	2	up&down	Molecular Function
GO:0016760	cellulose synthase (UDP-forming) activity	0.0029	0.0016	1.83	0.0236544	0.313991	BraA01g000410.3.5C;BraA01g045110.3.5C;BraA02g007160.3.5C;BraA03g004120.3.5C;BraA03g008060.3.5C;BraA03g049120.3.5C;BraA04g024550.3.5C;BraA04g024560.3.5C;BraA05g016400.3.5C;BraA05g016410.3.5C;BraA06g044820.3.5C;BraA10g001380.3.5C	12	up&down	Molecular Function
GO:0005227	calcium activated cation channel activity	0.0015	0.0006	2.46	0.0251191	0.327732	BraA01g012750.3.5C;BraA03g063310.3.5C;BraA05g042040.3.5C;BraA07g003230.3.5C;BraA09g016510.3.5C;BraA09g036190.3.5C	6	up&down	Molecular Function
GO:0015369	calcium:proton antiporter activity	0.0012	0.0004	2.74	0.0253309	0.327732	BraA01g039450.3.5C;BraA03g046250.3.5C;BraA04g028230.3.5C;BraA05g017580.3.5C;BraA06g001490.3.5C	5	up&down	Molecular Function
GO:0005504	fatty acid binding	0.0019	0.0009	2.1	0.0275127	0.336822	BraA02g041340.3.5C;BraA03g013460.3.5C;BraA04g000270.3.5C;BraA04g006230.3.5C;BraA05g007550.3.5C;BraA05g029350.3.5C;BraA10g013660.3.5C;BraA10g028770.3.5C	8	up&down	Molecular Function
GO:0008792	arginine decarboxylase activity	0.0007	0.0002	3.94	0.0276811	0.336822	BraA01g003590.3.5C;BraA01g003600.3.5C;BraA10g029460.3.5C	3	down	Molecular Function
GO:0008995	ribonuclease E activity	0.0007	0.0002	3.94	0.0276811	0.336822	BraA07g009060.3.5C;BraA09g032200.3.5C;BraA10g013760.3.5C	3	up&down	Molecular Function
GO:0009383	rRNA (cytosine-C5-)-methyltransferase activity	0.0007	0.0002	3.94	0.0276811	0.336822	BraA01g039550.3.5C;BraA02g013430.3.5C;BraA02g035000.3.5C	3	up	Molecular Function
GO:0140078	class I DNA-(apurinic or apyrimidinic site) lyase activity	0.0007	0.0002	3.94	0.0276811	0.336822	BraA03g016660.3.5C;BraA03g022020.3.5C;BraA09g066010.3.5C	3	up&down	Molecular Function
GO:0004857	enzyme inhibitor activity	0.0065	0.0045	1.44	0.0293683	0.353147	BraA01g016070.3.5C;BraA01g038680.3.5C;BraA01g038690.3.5C;BraA02g036140.3.5C;BraA03g002830.3.5C;BraA03g009790.3.5C;BraA03g019980.3.5C;BraA04g002770.3.5C;BraA04g028310.3.5C;BraA04g033720.3.5C;BraA05g004930.3.5C;BraA06g004930.3.5C;BraA06g019850.3.5C;BraA06g035050.3.5C;BraA07g009060.3.5C;BraA08g017200.3.5C;BraA08g030590.3.5C;BraA09g007440.3.5C;BraA09g016110.3.5C;BraA09g016130.3.5C;BraA09g024170.3.5C;…	27	up&down	Molecular Function
GO:0042910	xenobiotic transporter activity	0.0058	0.0039	1.47	0.0303577	0.360799	BraA01g031470.3.5C;BraA01g033220.3.5C;BraA02g015750.3.5C;BraA02g015970.3.5C;BraA03g004350.3.5C;BraA03g018010.3.5C;BraA03g051530.3.5C;BraA03g053630.3.5C;BraA05g038810.3.5C;BraA05g043120.3.5C;BraA06g022940.3.5C;BraA06g029950.3.5C;BraA07g033400.3.5C;BraA07g033410.3.5C;BraA07g033420.3.5C;BraA08g005360.3.5C;BraA08g015170.3.5C;BraA09g008830.3.5C;BraA09g033370.3.5C;BraA09g057300.3.5C;BraA09g060610.3.5C;…	24	up&down	Molecular Function
GO:0046872	metal ion binding	0.0653	0.0589	1.11	0.0315327	0.370457	BraA01g000410.3.5C;BraA01g001330.3.5C;BraA01g001740.3.5C;BraA01g002040.3.5C;BraA01g003290.3.5C;BraA01g007540.3.5C;BraA01g007590.3.5C;BraA01g007600.3.5C;BraA01g008380.3.5C;BraA01g009510.3.5C;BraA01g010600.3.5C;BraA01g010850.3.5C;BraA01g012640.3.5C;BraA01g013500.3.5C;BraA01g016120.3.5C;BraA01g016190.3.5C;BraA01g016860.3.5C;BraA01g018650.3.5C;BraA01g020740.3.5C;BraA01g021320.3.5C;BraA01g023830.3.5C;…	270	up&down	Molecular Function
GO:0019901	protein kinase binding	0.0029	0.0017	1.75	0.0332352	0.386021	BraA01g008560.3.5C;BraA02g025520.3.5C;BraA03g023650.3.5C;BraA03g057200.3.5C;BraA05g004670.3.5C;BraA05g004900.3.5C;BraA07g025140.3.5C;BraA07g040440.3.5C;BraA09g052200.3.5C;BraA10g029770.3.5C;Brassica_rapa_newGene_1635;Brassica_rapa_newGene_989	12	up&down	Molecular Function
GO:0016872	intramolecular lyase activity	0.001	0.0003	2.92	0.0355863	0.404144	BraA04g000270.3.5C;BraA07g022760.3.5C;BraA09g047940.3.5C;BraA10g028240.3.5C	4	up	Molecular Function
GO:0070182	DNA polymerase binding	0.001	0.0003	2.92	0.0355863	0.404144	BraA03g016590.3.5C;BraA05g013700.3.5C;BraA08g011420.3.5C;BraAnng000140.3.5C	4	up	Molecular Function
GO:0036459	thiol-dependent ubiquitinyl hydrolase activity	0.0036	0.0022	1.62	0.0372637	0.418544	BraA01g034280.3.5C;BraA02g042960.3.5C;BraA02g042970.3.5C;BraA03g017510.3.5C;BraA04g018400.3.5C;BraA05g012990.3.5C;BraA05g027830.3.5C;BraA06g034570.3.5C;BraA09g000390.3.5C;BraA09g001060.3.5C;BraA09g005720.3.5C;BraA10g019340.3.5C;BraAnng002740.3.5C;BraAnng004750.3.5C;BraAnng004820.3.5C	15	up&down	Molecular Function
GO:0015267	channel activity	0.0034	0.0021	1.64	0.038048	0.422707	BraA01g003270.3.5C;BraA01g010440.3.5C;BraA01g037290.3.5C;BraA02g010420.3.5C;BraA03g019280.3.5C;BraA03g027550.3.5C;BraA03g049230.3.5C;BraA05g008170.3.5C;BraA05g008180.3.5C;BraA05g010670.3.5C;BraA05g010690.3.5C;BraA07g023320.3.5C;BraA07g043720.3.5C;BraA09g067920.3.5C	14	up&down	Molecular Function
GO:0051119	sugar transmembrane transporter activity	0.0017	0.0008	2.09	0.0394442	0.433506	BraA01g024460.3.5C;BraA03g005710.3.5C;BraA03g047130.3.5C;BraA06g017360.3.5C;BraA06g025690.3.5C;BraA06g032300.3.5C;BraA08g027920.3.5C	7	up&down	Molecular Function
GO:0022857	transmembrane transporter activity	0.0198	0.0165	1.2	0.0430096	0.467663	BraA01g013730.3.5C;BraA01g025200.3.5C;BraA01g030420.3.5C;BraA01g031470.3.5C;BraA01g037320.3.5C;BraA01g041300.3.5C;BraA02g003420.3.5C;BraA02g015750.3.5C;BraA02g015970.3.5C;BraA02g018670.3.5C;BraA02g023590.3.5C;BraA02g026140.3.5C;BraA02g027620.3.5C;BraA02g035330.3.5C;BraA02g037020.3.5C;BraA03g018010.3.5C;BraA03g019720.3.5C;BraA03g021480.3.5C;BraA03g021760.3.5C;BraA03g030020.3.5C;BraA03g032850.3.5C;…	82	up&down	Molecular Function
GO:0002020	protease binding	0.0007	0.0002	3.29	0.0491564	0.514325	BraA02g021530.3.5C;BraA07g030290.3.5C;BraA09g042320.3.5C	3	up&down	Molecular Function
GO:0016655	oxidoreductase activity, acting on NAD(P)H, quinone or similar compound as acceptor	0.0007	0.0002	3.29	0.0491564	0.514325	BraA02g020710.3.5C;BraA07g036610.3.5C;BraA08g022180.3.5C	3	up	Molecular Function
GO:0033293	monocarboxylic acid binding	0.0007	0.0002	3.29	0.0491564	0.514325	BraA03g019980.3.5C;BraA04g028310.3.5C;BraA10g000560.3.5C	3	down	Molecular Function
GO:0004356	glutamate-ammonia ligase activity	0.0012	0.0005	2.35	0.0493137	0.514325	BraA01g036090.3.5C;BraA02g017450.3.5C;BraA03g038620.3.5C;BraA08g009550.3.5C;BraA09g046110.3.5C	5	up&down	Molecular Function
GO:0042555	MCM complex	0.0033	0.0006	5.26	1.92777e-07	0.000104099	BraA02g033860.3.5C;BraA03g029730.3.5C;BraA03g042610.3.5C;BraA03g043040.3.5C;BraA03g043650.3.5C;BraA04g029920.3.5C;BraA05g037940.3.5C;BraA06g043410.3.5C;BraA06g044370.3.5C;BraA08g005860.3.5C;BraA09g002260.3.5C	11	up	Cellular Component
GO:0005618	cell wall	0.0193	0.0114	1.7	8.2277e-06	0.00222148	BraA01g002340.3.5C;BraA01g007440.3.5C;BraA01g007450.3.5C;BraA01g007460.3.5C;BraA01g016610.3.5C;BraA01g024640.3.5C;BraA01g038680.3.5C;BraA01g038690.3.5C;BraA01g042340.3.5C;BraA02g003510.3.5C;BraA02g009100.3.5C;BraA02g019820.3.5C;BraA02g036400.3.5C;BraA02g037120.3.5C;BraA02g044760.3.5C;BraA02g046150.3.5C;BraA03g000670.3.5C;BraA03g002830.3.5C;BraA03g009730.3.5C;BraA03g010710.3.5C;BraA03g012750.3.5C;…	65	up&down	Cellular Component
GO:0005886	plasma membrane	0.0938	0.077	1.22	6.42663e-05	0.0115679	BraA01g000410.3.5C;BraA01g000540.3.5C;BraA01g000960.3.5C;BraA01g002950.3.5C;BraA01g003100.3.5C;BraA01g008560.3.5C;BraA01g009640.3.5C;BraA01g011390.3.5C;BraA01g012750.3.5C;BraA01g013320.3.5C;BraA01g013630.3.5C;BraA01g013930.3.5C;BraA01g015520.3.5C;BraA01g016720.3.5C;BraA01g018280.3.5C;BraA01g021990.3.5C;BraA01g024460.3.5C;BraA01g025200.3.5C;BraA01g032570.3.5C;BraA01g032900.3.5C;BraA01g036600.3.5C;…	315	up&down	Cellular Component
GO:0000786	nucleosome	0.0083	0.0043	1.95	0.000271546	0.0366588	BraA01g017990.3.5C;BraA01g034150.3.5C;BraA02g000570.3.5C;BraA02g003470.3.5C;BraA02g010800.3.5C;BraA02g010980.3.5C;BraA02g041190.3.5C;BraA03g004320.3.5C;BraA03g011160.3.5C;BraA03g020440.3.5C;BraA04g005760.3.5C;BraA04g006430.3.5C;BraA04g008300.3.5C;BraA05g027460.3.5C;BraA06g004970.3.5C;BraA06g005460.3.5C;BraA06g021180.3.5C;BraA06g021190.3.5C;BraA08g033390.3.5C;BraA08g033400.3.5C;BraA09g005300.3.5C;…	28	up&down	Cellular Component
GO:0000307	cyclin-dependent protein kinase holoenzyme complex	0.0065	0.0034	1.91	0.00158202	0.169426	BraA01g004150.3.5C;BraA02g001940.3.5C;BraA02g007060.3.5C;BraA03g002440.3.5C;BraA03g015770.3.5C;BraA03g059660.3.5C;BraA03g060810.3.5C;BraA05g021430.3.5C;BraA05g031550.3.5C;BraA06g006560.3.5C;BraA06g010900.3.5C;BraA06g011570.3.5C;BraA06g031510.3.5C;BraA07g017190.3.5C;BraA07g020540.3.5C;BraA07g040890.3.5C;BraA08g005440.3.5C;BraA08g005450.3.5C;BraA08g028370.3.5C;BraA08g030620.3.5C;BraA09g060380.3.5C;…	22	up&down	Cellular Component
GO:0005634	nucleus	0.2455	0.226	1.09	0.001944	0.169426	BraA01g000670.3.5C;BraA01g000720.3.5C;BraA01g000870.3.5C;BraA01g001210.3.5C;BraA01g001340.3.5C;BraA01g001720.3.5C;BraA01g002560.3.5C;BraA01g003750.3.5C;BraA01g003820.3.5C;BraA01g004150.3.5C;BraA01g004230.3.5C;BraA01g005280.3.5C;BraA01g006060.3.5C;BraA01g006160.3.5C;BraA01g006280.3.5C;BraA01g006770.3.5C;BraA01g007940.3.5C;BraA01g008180.3.5C;BraA01g008390.3.5C;BraA01g008560.3.5C;BraA01g008570.3.5C;…	825	up&down	Cellular Component
GO:0035861	site of double-strand break	0.0012	0.0002	5.35	0.00219626	0.169426	BraA04g007720.3.5C;BraA04g019080.3.5C;BraA06g044270.3.5C;BraA09g028730.3.5C	4	up&down	Cellular Component
GO:0051233	spindle midzone	0.0009	0.0001	6.69	0.00333923	0.225398	BraA01g005250.3.5C;BraA06g027120.3.5C;BraA08g017330.3.5C	3	up	Cellular Component
GO:0009523	photosystem II	0.0045	0.0024	1.89	0.00910947	0.546568	BraA01g029970.3.5C;BraA02g000200.3.5C;BraA02g014370.3.5C;BraA05g010630.3.5C;BraA05g010640.3.5C;BraA05g014040.3.5C;BraA06g023770.3.5C;BraA07g025470.3.5C;BraA07g032170.3.5C;BraA08g005690.3.5C;BraA08g028970.3.5C;BraA08g030320.3.5C;BraA09g034880.3.5C;BraA09g047590.3.5C;BraAnng000580.3.5C	15	up&down	Cellular Component
GO:0031380	nuclear RNA-directed RNA polymerase complex	0.0012	0.0003	3.82	0.011947	0.591313	BraA01g023930.3.5C;BraA07g000870.3.5C;BraA09g028460.3.5C;BraA10g017890.3.5C	4	up&down	Cellular Component
GO:0010287	plastoglobule	0.003	0.0014	2.16	0.0120453	0.591313	BraA01g012920.3.5C;BraA01g029970.3.5C;BraA02g000200.3.5C;BraA02g014370.3.5C;BraA03g002130.3.5C;BraA03g028390.3.5C;BraA08g010030.3.5C;BraA08g026130.3.5C;BraA08g030320.3.5C;BraA09g026930.3.5C	10	up&down	Cellular Component
GO:0009522	photosystem I	0.0039	0.002	1.89	0.0148206	0.666928	BraA01g029970.3.5C;BraA02g000200.3.5C;BraA02g014370.3.5C;BraA05g010630.3.5C;BraA05g010640.3.5C;BraA06g023760.3.5C;BraA07g025470.3.5C;BraA08g005690.3.5C;BraA08g023770.3.5C;BraA08g028970.3.5C;BraA08g030320.3.5C;BraA09g036170.3.5C;BraA09g047590.3.5C	13	up&down	Cellular Component
GO:0016021	integral component of membrane	0.3845	0.368	1.04	0.0167183	0.69445	BraA01g000280.3.5C;BraA01g000410.3.5C;BraA01g001600.3.5C;BraA01g002290.3.5C;BraA01g002330.3.5C;BraA01g002400.3.5C;BraA01g003100.3.5C;BraA01g003220.3.5C;BraA01g003270.3.5C;BraA01g003410.3.5C;BraA01g003650.3.5C;BraA01g003720.3.5C;BraA01g004460.3.5C;BraA01g005360.3.5C;BraA01g005390.3.5C;BraA01g005410.3.5C;BraA01g005630.3.5C;BraA01g005900.3.5C;BraA01g006210.3.5C;BraA01g006600.3.5C;BraA01g006720.3.5C;…	1292	up&down	Cellular Component
GO:0009535	chloroplast thylakoid membrane	0.0128	0.0094	1.36	0.0197809	0.709827	BraA01g008860.3.5C;BraA01g011350.3.5C;BraA01g012020.3.5C;BraA01g012920.3.5C;BraA01g029970.3.5C;BraA01g037370.3.5C;BraA02g000200.3.5C;BraA02g002260.3.5C;BraA02g014370.3.5C;BraA03g027020.3.5C;BraA03g028390.3.5C;BraA03g030230.3.5C;BraA03g037750.3.5C;BraA03g051430.3.5C;BraA04g033450.3.5C;BraA05g010160.3.5C;BraA05g010630.3.5C;BraA05g010640.3.5C;BraA05g015460.3.5C;BraA05g025120.3.5C;BraA05g035670.3.5C;…	43	up&down	Cellular Component
GO:0032133	chromosome passenger complex	0.0006	0.0001	6.69	0.0223464	0.709827	BraA01g005250.3.5C;BraA08g017330.3.5C	2	up	Cellular Component
GO:0070761	pre-snoRNP complex	0.0006	0.0001	6.69	0.0223464	0.709827	BraA06g004310.3.5C;BraA08g035130.3.5C	2	up	Cellular Component
GO:1905202	methylcrotonoyl-CoA carboxylase complex	0.0006	0.0001	6.69	0.0223464	0.709827	BraA03g059600.3.5C;BraA08g016740.3.5C	2	down	Cellular Component
GO:0009505	plant-type cell wall	0.0074	0.005	1.48	0.026441	0.793229	BraA01g005650.3.5C;BraA01g010780.3.5C;BraA01g020090.3.5C;BraA01g024640.3.5C;BraA02g002750.3.5C;BraA02g044760.3.5C;BraA02g046320.3.5C;BraA02g046530.3.5C;BraA03g002830.3.5C;BraA03g032790.3.5C;BraA03g046660.3.5C;BraA03g057330.3.5C;BraA05g026180.3.5C;BraA05g027690.3.5C;BraA06g018920.3.5C;BraA06g036130.3.5C;BraA07g012160.3.5C;BraA07g027500.3.5C;BraA07g030550.3.5C;BraA07g042160.3.5C;BraA09g008480.3.5C;…	25	up&down	Cellular Component
GO:0048046	apoplast	0.0116	0.0087	1.33	0.0357422	0.905412	BraA01g007440.3.5C;BraA01g007450.3.5C;BraA01g007460.3.5C;BraA01g014480.3.5C;BraA01g016610.3.5C;BraA02g000350.3.5C;BraA02g000830.3.5C;BraA02g009100.3.5C;BraA02g021530.3.5C;BraA02g036400.3.5C;BraA03g009730.3.5C;BraA03g019070.3.5C;BraA03g029050.3.5C;BraA03g042660.3.5C;BraA03g052230.3.5C;BraA03g056660.3.5C;BraA03g056670.3.5C;BraA03g062320.3.5C;BraA04g027340.3.5C;BraA04g028180.3.5C;BraA04g033270.3.5C;…	39	up&down	Cellular Component
GO:0055044	symplast	0.0095	0.007	1.35	0.0429138	0.905412	BraA01g034280.3.5C;BraA02g012110.3.5C;BraA02g021530.3.5C;BraA02g025310.3.5C;BraA02g025520.3.5C;BraA02g042960.3.5C;BraA02g042970.3.5C;BraA02g044760.3.5C;BraA03g002830.3.5C;BraA03g010710.3.5C;BraA03g017510.3.5C;BraA03g030970.3.5C;BraA04g018400.3.5C;BraA04g031080.3.5C;BraA05g012990.3.5C;BraA05g027830.3.5C;BraA06g034570.3.5C;BraA07g012160.3.5C;BraA07g030290.3.5C;BraA07g035100.3.5C;BraA07g042220.3.5C;…	32	up&down	Cellular Component
GO:0005911	cell-cell junction	0.0101	0.0076	1.34	0.0443648	0.905412	BraA01g034280.3.5C;BraA02g012110.3.5C;BraA02g021530.3.5C;BraA02g025310.3.5C;BraA02g025520.3.5C;BraA02g042960.3.5C;BraA02g042970.3.5C;BraA02g044760.3.5C;BraA03g002830.3.5C;BraA03g006260.3.5C;BraA03g010710.3.5C;BraA03g017510.3.5C;BraA03g030970.3.5C;BraA03g044670.3.5C;BraA04g018400.3.5C;BraA04g031080.3.5C;BraA05g012990.3.5C;BraA05g027830.3.5C;BraA06g034570.3.5C;BraA07g012160.3.5C;BraA07g030290.3.5C;…	34	up&down	Cellular Component
GO:0046658	anchored component of plasma membrane	0.0104	0.0078	1.33	0.0449975	0.905412	BraA01g006710.3.5C;BraA01g034210.3.5C;BraA02g003740.3.5C;BraA02g012070.3.5C;BraA02g013770.3.5C;BraA02g021630.3.5C;BraA02g032000.3.5C;BraA02g042980.3.5C;BraA02g044760.3.5C;BraA02g047400.3.5C;BraA03g007020.3.5C;BraA03g007030.3.5C;BraA03g025510.3.5C;BraA03g030070.3.5C;BraA03g044440.3.5C;BraA03g049970.3.5C;BraA03g057970.3.5C;BraA04g003670.3.5C;BraA04g004970.3.5C;BraA05g034580.3.5C;BraA05g043380.3.5C;…	35	up&down	Cellular Component
