# Supplementary material for: Comparative Transcriptome Analysis of Purple and Green Flowering Chinese Cabbage and Functional Analyses of BrMYB114 Gene
Source: Int J Mol Sci. 2023 Sep 11;24(18):13951. doi: 10.3390/ijms241813951 (PMC10531404; doi:10.3390/ijms241813951)
Supplement: Supplementary file 1 [file ijms-24-13951-s001.zip › Table S5.xlsx]

## Sheet: Sheet1
Supplemental Table S5: The KEGG enriched pathway by the DEGs.
KEGG_A_class	KEGG_B_class	ID	Pathway	GeneRatio	BgRatio	enrich_factor	pvalue	qvalue	geneID	gene_number	Contained
Environmental Information Processing	Signal transduction	ko04075	Plant hormone signal transduction	0.0946	0.0717	1.32	4.70723e-06	0.000564868	BraA01g000150.3.5C;BraA01g000170.3.5C;BraA01g000870.3.5C;BraA01g001780.3.5C;BraA01g002500.3.5C;BraA01g003510.3.5C;BraA01g003530.3.5C;BraA01g003540.3.5C;BraA01g003550.3.5C;BraA01g004150.3.5C;BraA01g010190.3.5C;BraA01g013320.3.5C;BraA01g014810.3.5C;BraA01g016860.3.5C;BraA01g018030.3.5C;BraA01g025100.3.5C;BraA01g025600.3.5C;BraA01g029210.3.5C;BraA01g031720.3.5C;BraA01g031970.3.5C;BraA01g033650.3.5C;…	217	up&down
Metabolism	Lipid metabolism	ko00561	Glycerolipid metabolism	0.0257	0.0168	1.53	0.000389026	0.0233416	BraA01g010550.3.5C;BraA01g019640.3.5C;BraA01g035330.3.5C;BraA01g038220.3.5C;BraA01g043170.3.5C;BraA02g002750.3.5C;BraA02g007740.3.5C;BraA02g026800.3.5C;BraA02g026840.3.5C;BraA02g033490.3.5C;BraA02g033510.3.5C;BraA02g045540.3.5C;BraA03g003260.3.5C;BraA03g019630.3.5C;BraA03g029800.3.5C;BraA03g049270.3.5C;BraA03g058600.3.5C;BraA04g028860.3.5C;BraA05g007380.3.5C;BraA05g007600.3.5C;BraA05g007620.3.5C;…	59	up&down
Metabolism	Metabolism of terpenoids and polyketides	ko00905	Brassinosteroid biosynthesis	0.0044	0.0016	2.79	0.00133422	0.0533689	BraA01g002330.3.5C;BraA01g023120.3.5C;BraA01g039110.3.5C;BraA02g040670.3.5C;BraA03g061190.3.5C;BraA07g018400.3.5C;BraA07g039870.3.5C;BraA09g043590.3.5C;BraA10g023710.3.5C;BraA10g028510.3.5C	10	up&down
Metabolism	Metabolism of terpenoids and polyketides	ko00908	Zeatin biosynthesis	0.0092	0.0048	1.9	0.00207318	0.0621954	BraA01g025520.3.5C;BraA02g009630.3.5C;BraA02g011110.3.5C;BraA02g017940.3.5C;BraA02g025420.3.5C;BraA03g006570.3.5C;BraA03g009410.3.5C;BraA03g022040.3.5C;BraA04g000320.3.5C;BraA04g027300.3.5C;BraA05g008450.3.5C;BraA05g008460.3.5C;BraA07g015180.3.5C;BraA07g015190.3.5C;BraA08g027450.3.5C;BraA09g042450.3.5C;BraA09g046070.3.5C;BraA09g054160.3.5C;BraA10g010980.3.5C;BraA10g021270.3.5C;BraA10g028670.3.5C	21	up&down
Metabolism	Energy metabolism	ko00710	Carbon fixation in photosynthetic organisms	0.0153	0.01	1.53	0.00574829	0.137959	BraA01g001100.3.5C;BraA01g021320.3.5C;BraA01g039870.3.5C;BraA02g004150.3.5C;BraA02g017890.3.5C;BraA02g020920.3.5C;BraA03g011960.3.5C;BraA03g035940.3.5C;BraA03g062330.3.5C;BraA04g004680.3.5C;BraA04g015760.3.5C;BraA05g008300.3.5C;BraA05g008330.3.5C;BraA05g013860.3.5C;BraA05g033230.3.5C;BraA05g041500.3.5C;BraA06g005510.3.5C;BraA06g008970.3.5C;BraA06g029030.3.5C;BraA06g034290.3.5C;BraA07g000880.3.5C;…	35	up&down
Metabolism	Biosynthesis of other secondary metabolites	ko00261	Monobactam biosynthesis	0.0039	0.0017	2.31	0.010138	0.160056	BraA02g013950.3.5C;BraA03g023290.3.5C;BraA04g032480.3.5C;BraA04g032660.3.5C;BraA05g005140.3.5C;BraA06g044980.3.5C;BraA07g007340.3.5C;BraA08g028620.3.5C;BraA08g030610.3.5C	9	up&down
Metabolism	Biosynthesis of other secondary metabolites	ko00940	Phenylpropanoid biosynthesis	0.0445	0.0359	1.24	0.0107065	0.160056	BraA01g001050.3.5C;BraA01g001330.3.5C;BraA01g002400.3.5C;BraA01g007540.3.5C;BraA01g011610.3.5C;BraA01g012480.3.5C;BraA01g012640.3.5C;BraA01g025800.3.5C;BraA01g033310.3.5C;BraA01g035920.3.5C;BraA01g035930.3.5C;BraA01g040280.3.5C;BraA01g042020.3.5C;BraA01g044790.3.5C;BraA02g001350.3.5C;BraA02g001730.3.5C;BraA02g003100.3.5C;BraA02g004470.3.5C;BraA02g005650.3.5C;BraA02g011880.3.5C;BraA02g018510.3.5C;…	102	up&down
Environmental Information Processing	Membrane transport	ko02010	ABC transporters	0.0161	0.0111	1.45	0.0113265	0.160056	BraA01g008890.3.5C;BraA01g016120.3.5C;BraA02g015500.3.5C;BraA02g017170.3.5C;BraA02g039670.3.5C;BraA03g042920.3.5C;BraA03g048640.3.5C;BraA04g005090.3.5C;BraA04g005270.3.5C;BraA05g000820.3.5C;BraA05g008100.3.5C;BraA05g010360.3.5C;BraA05g020830.3.5C;BraA05g026910.3.5C;BraA05g031860.3.5C;BraA06g004650.3.5C;BraA06g011260.3.5C;BraA06g011530.3.5C;BraA06g038430.3.5C;BraA07g010850.3.5C;BraA07g022750.3.5C;…	37	up&down
Metabolism	Carbohydrate metabolism	ko00500	Starch and sucrose metabolism	0.0454	0.0368	1.23	0.0121382	0.160056	BraA01g000250.3.5C;BraA01g006710.3.5C;BraA01g012480.3.5C;BraA01g015430.3.5C;BraA01g017210.3.5C;BraA01g019500.3.5C;BraA01g021930.3.5C;BraA01g035920.3.5C;BraA01g035930.3.5C;BraA01g040280.3.5C;BraA01g042020.3.5C;BraA01g042240.3.5C;BraA01g044790.3.5C;BraA01g044930.3.5C;BraA02g008150.3.5C;BraA02g008920.3.5C;BraA02g012070.3.5C;BraA02g013510.3.5C;BraA02g013770.3.5C;BraA02g017130.3.5C;BraA02g017190.3.5C;…	104	up&down
Metabolism	Biosynthesis of other secondary metabolites	ko00944	Flavone and flavonol biosynthesis	0.0013	0.0003	4.81	0.013338	0.160056	BraA02g006930.3.5C;BraA08g035620.3.5C;BraA10g030330.3.5C	3	up
Metabolism	Glycan biosynthesis and metabolism	ko00511	Other glycan degradation	0.0135	0.0094	1.44	0.0203377	0.212651	BraA01g002340.3.5C;BraA01g016960.3.5C;BraA01g039100.3.5C;BraA01g040960.3.5C;BraA01g040990.3.5C;BraA02g012990.3.5C;BraA02g030150.3.5C;BraA02g036480.3.5C;BraA02g036560.3.5C;BraA02g046150.3.5C;BraA02g047570.3.5C;BraA03g012750.3.5C;BraA03g064300.3.5C;BraA04g007170.3.5C;BraA05g034280.3.5C;BraA05g041130.3.5C;BraA06g044700.3.5C;BraA07g011890.3.5C;BraA07g011910.3.5C;BraA07g019510.3.5C;BraA07g031920.3.5C;…	31	up&down
Metabolism	Biosynthesis of other secondary metabolites	ko00941	Flavonoid biosynthesis	0.0118	0.008	1.47	0.0231576	0.212651	BraA01g013500.3.5C;BraA01g023830.3.5C;BraA02g005240.3.5C;BraA02g018510.3.5C;BraA03g006050.3.5C;BraA03g012200.3.5C;BraA03g016180.3.5C;BraA03g045960.3.5C;BraA03g051420.3.5C;BraA04g008840.3.5C;BraA04g022890.3.5C;BraA04g022900.3.5C;BraA04g030160.3.5C;BraA05g014090.3.5C;BraA07g000270.3.5C;BraA07g009450.3.5C;BraA07g022760.3.5C;BraA08g016730.3.5C;BraA09g002390.3.5C;BraA09g020360.3.5C;BraA09g035390.3.5C;…	27	up&down
Metabolism	Glycan biosynthesis and metabolism	ko00531	Glycosaminoglycan degradation	0.0092	0.0059	1.55	0.0241938	0.212651	BraA01g002340.3.5C;BraA01g016960.3.5C;BraA01g039100.3.5C;BraA02g012990.3.5C;BraA02g036480.3.5C;BraA02g036560.3.5C;BraA02g042580.3.5C;BraA02g046150.3.5C;BraA02g047570.3.5C;BraA03g012750.3.5C;BraA04g007170.3.5C;BraA05g034280.3.5C;BraA06g044700.3.5C;BraA07g019510.3.5C;BraA07g031920.3.5C;BraA07g034400.3.5C;BraA08g005830.3.5C;BraA08g011950.3.5C;BraA08g025830.3.5C;BraA09g039260.3.5C;BraA10g007380.3.5C	21	up&down
Metabolism	Amino acid metabolism	ko00280	Valine, leucine and isoleucine degradation	0.0118	0.0081	1.46	0.0256458	0.212651	BraA01g020730.3.5C;BraA01g032570.3.5C;BraA02g003010.3.5C;BraA02g020990.3.5C;BraA02g041590.3.5C;BraA03g003900.3.5C;BraA03g059600.3.5C;BraA04g000130.3.5C;BraA04g009400.3.5C;BraA05g015820.3.5C;BraA05g029770.3.5C;BraA05g029780.3.5C;BraA05g041710.3.5C;BraA06g017940.3.5C;BraA06g025240.3.5C;BraA08g006090.3.5C;BraA08g016740.3.5C;BraA08g022670.3.5C;BraA08g022740.3.5C;BraA08g032900.3.5C;BraA08g034500.3.5C;…	27	up&down
Metabolism	Carbohydrate metabolism	ko00010	Glycolysis / Gluconeogenesis	0.0257	0.0202	1.28	0.0266343	0.212651	BraA01g001100.3.5C;BraA01g012740.3.5C;BraA01g014720.3.5C;BraA01g015430.3.5C;BraA01g020730.3.5C;BraA01g021320.3.5C;BraA01g039870.3.5C;BraA02g000300.3.5C;BraA02g012700.3.5C;BraA02g025250.3.5C;BraA02g041910.3.5C;BraA02g043730.3.5C;BraA02g045540.3.5C;BraA03g004780.3.5C;BraA03g008900.3.5C;BraA03g018980.3.5C;BraA03g019630.3.5C;BraA03g035940.3.5C;BraA03g044220.3.5C;BraA03g062330.3.5C;BraA04g007030.3.5C;…	59	up&down
Metabolism	Glycan biosynthesis and metabolism	ko00604	Glycosphingolipid biosynthesis - ganglio series	0.0083	0.0053	1.56	0.0283535	0.212651	BraA01g002340.3.5C;BraA01g016960.3.5C;BraA01g039100.3.5C;BraA02g012990.3.5C;BraA02g036480.3.5C;BraA02g036560.3.5C;BraA02g046150.3.5C;BraA02g047570.3.5C;BraA03g012750.3.5C;BraA04g007170.3.5C;BraA05g034280.3.5C;BraA06g044700.3.5C;BraA07g019510.3.5C;BraA07g031920.3.5C;BraA07g034400.3.5C;BraA08g005830.3.5C;BraA08g025830.3.5C;BraA09g039260.3.5C;BraA10g007380.3.5C	19	up&down
Metabolism	Biosynthesis of other secondary metabolites	ko00402	Benzoxazinoid biosynthesis	0.0044	0.0023	1.89	0.030257	0.213579	BraA04g023250.3.5C;BraA04g023260.3.5C;BraA06g020740.3.5C;BraA08g035450.3.5C;BraA09g065620.3.5C;BraA10g001920.3.5C;BraA10g002750.3.5C;BraA10g002760.3.5C;BraA10g004540.3.5C;BraA10g005250.3.5C	10	up&down
Organismal Systems	Environmental adaptation	ko04626	Plant-pathogen interaction	0.089	0.0794	1.12	0.037306	0.246548	BraA01g003750.3.5C;BraA01g004810.3.5C;BraA01g010190.3.5C;BraA01g010850.3.5C;BraA01g013320.3.5C;BraA01g014560.3.5C;BraA01g017980.3.5C;BraA01g018810.3.5C;BraA01g022310.3.5C;BraA01g025130.3.5C;BraA01g025840.3.5C;BraA01g029000.3.5C;BraA01g031720.3.5C;BraA01g033650.3.5C;BraA01g036360.3.5C;BraA01g036460.3.5C;BraA01g037730.3.5C;BraA01g039620.3.5C;BraA01g042210.3.5C;BraA02g001440.3.5C;BraA02g002290.3.5C;…	204	up&down
Metabolism	Lipid metabolism	ko00591	Linoleic acid metabolism	0.0035	0.0018	1.98	0.0390368	0.246548	BraA01g026980.3.5C;BraA02g018270.3.5C;BraA05g017360.3.5C;BraA07g001120.3.5C;BraA07g026310.3.5C;BraA07g032230.3.5C;BraA09g059390.3.5C;BraA10g032220.3.5C	8	up&down
Metabolism	Metabolism of terpenoids and polyketides	ko00904	Diterpenoid biosynthesis	0.007	0.0046	1.53	0.0492695	0.29478	BraA01g016190.3.5C;BraA02g002300.3.5C;BraA02g011740.3.5C;BraA02g025510.3.5C;BraA02g026880.3.5C;BraA03g002930.3.5C;BraA03g041980.3.5C;BraA03g062690.3.5C;BraA05g012570.3.5C;BraA06g017990.3.5C;BraA07g043370.3.5C;BraA08g024030.3.5C;BraA08g032160.3.5C;BraA10g001160.3.5C;BraA10g003700.3.5C;BraA10g030000.3.5C	16	up&down
Metabolism	Energy metabolism	ko00196	Photosynthesis - antenna proteins	0.0044	0.0025	1.74	0.052045	0.29478	BraA01g029970.3.5C;BraA02g000200.3.5C;BraA02g014370.3.5C;BraA05g010630.3.5C;BraA05g010640.3.5C;BraA07g025470.3.5C;BraA08g005690.3.5C;BraA08g028970.3.5C;BraA08g030320.3.5C;BraA09g047590.3.5C	10	up&down
Metabolism	Metabolism of other amino acids	ko00480	Glutathione metabolism	0.0174	0.0136	1.28	0.0540429	0.29478	BraA01g000540.3.5C;BraA01g006640.3.5C;BraA02g007020.3.5C;BraA02g025450.3.5C;BraA02g041970.3.5C;BraA03g023650.3.5C;BraA03g027020.3.5C;BraA04g022320.3.5C;BraA05g004670.3.5C;BraA05g004900.3.5C;BraA05g014980.3.5C;BraA05g027660.3.5C;BraA06g007270.3.5C;BraA06g013020.3.5C;BraA06g013030.3.5C;BraA06g013040.3.5C;BraA06g031710.3.5C;BraA06g035380.3.5C;BraA07g009760.3.5C;BraA07g013980.3.5C;BraA07g014120.3.5C;…	40	up&down
Metabolism	Lipid metabolism	ko00592	alpha-Linolenic acid metabolism	0.0109	0.008	1.36	0.0635572	0.331603	BraA02g018270.3.5C;BraA02g022650.3.5C;BraA02g031140.3.5C;BraA02g041590.3.5C;BraA03g049700.3.5C;BraA03g055810.3.5C;BraA04g022950.3.5C;BraA05g017360.3.5C;BraA05g042960.3.5C;BraA05g043050.3.5C;BraA07g001120.3.5C;BraA07g005950.3.5C;BraA07g016140.3.5C;BraA07g016150.3.5C;BraA07g026310.3.5C;BraA07g032230.3.5C;BraA07g041580.3.5C;BraA08g005750.3.5C;BraA08g033300.3.5C;BraA09g025460.3.5C;BraA09g045010.3.5C;…	25	up&down
Metabolism	Biosynthesis of other secondary metabolites	ko00945	Stilbenoid, diarylheptanoid and gingerol biosynthesis	0.0052	0.0033	1.57	0.0693085	0.338891	BraA02g018510.3.5C;BraA03g012200.3.5C;BraA03g016180.3.5C;BraA04g008840.3.5C;BraA04g022890.3.5C;BraA04g022900.3.5C;BraA04g030160.3.5C;BraA05g014090.3.5C;BraA07g000270.3.5C;BraA07g009450.3.5C;BraA08g016730.3.5C;BraA09g053340.3.5C	12	up&down
Metabolism	Biosynthesis of other secondary metabolites	ko00232	Caffeine metabolism	0.0022	0.001	2.14	0.0706023	0.338891	BraA09g001780.3.5C;BraA09g002160.3.5C;BraA09g002190.3.5C;BraAnng003430.3.5C;BraAnng003460.3.5C	5	up&down
Organismal Systems	Environmental adaptation	ko04712	Circadian rhythm - plant	0.0166	0.0132	1.25	0.081152	0.364936	BraA01g042340.3.5C;BraA01g045640.3.5C;BraA02g002730.3.5C;BraA02g003930.3.5C;BraA02g004010.3.5C;BraA02g005240.3.5C;BraA02g006280.3.5C;BraA02g043910.3.5C;BraA03g006050.3.5C;BraA03g006340.3.5C;BraA03g024450.3.5C;BraA03g038870.3.5C;BraA03g044790.3.5C;BraA05g000870.3.5C;BraA05g001020.3.5C;BraA05g001060.3.5C;BraA05g005300.3.5C;BraA05g017740.3.5C;BraA05g039060.3.5C;BraA05g039120.3.5C;BraA06g006520.3.5C;…	38	up&down
Metabolism	Lipid metabolism	ko00062	Fatty acid elongation	0.0074	0.0052	1.42	0.0821106	0.364936	BraA02g001440.3.5C;BraA02g010910.3.5C;BraA02g031950.3.5C;BraA03g004390.3.5C;BraA03g030530.3.5C;BraA03g059790.3.5C;BraA05g040040.3.5C;BraA06g005070.3.5C;BraA06g045000.3.5C;BraA07g004670.3.5C;BraA07g039970.3.5C;BraA09g010810.3.5C;BraA09g067700.3.5C;BraA10g000730.3.5C;BraA10g002650.3.5C;BraA10g016900.3.5C;BraA10g027470.3.5C	17	up&down
Metabolism	Lipid metabolism	ko00564	Glycerophospholipid metabolism	0.0214	0.0179	1.19	0.104955	0.449806	BraA01g010550.3.5C;BraA01g011900.3.5C;BraA01g017510.3.5C;BraA01g035330.3.5C;BraA01g038220.3.5C;BraA01g043710.3.5C;BraA02g017770.3.5C;BraA02g037800.3.5C;BraA03g003260.3.5C;BraA03g013450.3.5C;BraA03g022060.3.5C;BraA03g029800.3.5C;BraA03g049700.3.5C;BraA04g002800.3.5C;BraA04g015950.3.5C;BraA04g020490.3.5C;BraA04g022950.3.5C;BraA04g028470.3.5C;BraA05g007380.3.5C;BraA05g017360.3.5C;BraA05g017970.3.5C;…	49	up&down
Metabolism	Carbohydrate metabolism	ko00562	Inositol phosphate metabolism	0.017	0.0141	1.2	0.121373	0.492469	BraA01g000700.3.5C;BraA01g009600.3.5C;BraA01g019410.3.5C;BraA01g038720.3.5C;BraA02g001560.3.5C;BraA02g003400.3.5C;BraA02g011710.3.5C;BraA02g016160.3.5C;BraA03g001960.3.5C;BraA03g043140.3.5C;BraA03g048580.3.5C;BraA03g059120.3.5C;BraA04g004450.3.5C;BraA04g005120.3.5C;BraA04g009100.3.5C;BraA04g020490.3.5C;BraA05g015350.3.5C;BraA05g018990.3.5C;BraA05g033010.3.5C;BraA06g002960.3.5C;BraA06g013180.3.5C;…	39	up&down
Metabolism	Amino acid metabolism	ko00260	Glycine, serine and threonine metabolism	0.0135	0.011	1.23	0.126888	0.492469	BraA01g005620.3.5C;BraA01g020730.3.5C;BraA02g013950.3.5C;BraA02g025250.3.5C;BraA02g026840.3.5C;BraA03g034120.3.5C;BraA03g056330.3.5C;BraA04g031040.3.5C;BraA05g009780.3.5C;BraA06g045030.3.5C;BraA07g014640.3.5C;BraA07g016080.3.5C;BraA07g020340.3.5C;BraA07g036470.3.5C;BraA07g037060.3.5C;BraA07g044010.3.5C;BraA08g008020.3.5C;BraA08g008950.3.5C;BraA08g010320.3.5C;BraA08g022740.3.5C;BraA08g030610.3.5C;…	31	up&down
Metabolism	Carbohydrate metabolism	ko00520	Amino sugar and nucleotide sugar metabolism	0.0318	0.0281	1.13	0.131127	0.492469	BraA01g004950.3.5C;BraA01g014700.3.5C;BraA01g015430.3.5C;BraA01g021930.3.5C;BraA01g022730.3.5C;BraA01g041210.3.5C;BraA01g044930.3.5C;BraA01g045290.3.5C;BraA02g008150.3.5C;BraA02g017880.3.5C;BraA02g026980.3.5C;BraA02g035540.3.5C;BraA02g041860.3.5C;BraA02g043490.3.5C;BraA02g046530.3.5C;BraA03g006920.3.5C;BraA03g008350.3.5C;BraA03g023000.3.5C;BraA03g027680.3.5C;BraA03g045000.3.5C;BraA03g058600.3.5C;…	73	up&down
Metabolism	Metabolism of other amino acids	ko00460	Cyanoamino acid metabolism	0.0153	0.0126	1.21	0.131325	0.492469	BraA01g000540.3.5C;BraA01g001300.3.5C;BraA01g005620.3.5C;BraA01g012480.3.5C;BraA01g035920.3.5C;BraA01g035930.3.5C;BraA01g040280.3.5C;BraA01g042020.3.5C;BraA01g044790.3.5C;BraA02g022210.3.5C;BraA02g031230.3.5C;BraA03g001860.3.5C;BraA03g002830.3.5C;BraA03g002840.3.5C;BraA03g011760.3.5C;BraA03g011770.3.5C;BraA03g028950.3.5C;BraA04g001430.3.5C;BraA04g024810.3.5C;BraA04g030700.3.5C;BraA04g033700.3.5C;…	35	up&down
Metabolism	Amino acid metabolism	ko00250	Alanine, aspartate and glutamate metabolism	0.0096	0.0076	1.26	0.144908	0.512367	BraA01g009970.3.5C;BraA01g036090.3.5C;BraA01g036130.3.5C;BraA02g002380.3.5C;BraA02g017450.3.5C;BraA02g026170.3.5C;BraA03g007940.3.5C;BraA03g038620.3.5C;BraA05g013860.3.5C;BraA05g025850.3.5C;BraA06g020260.3.5C;BraA06g029610.3.5C;BraA07g004600.3.5C;BraA07g014640.3.5C;BraA07g036470.3.5C;BraA08g009550.3.5C;BraA08g013480.3.5C;BraA08g022740.3.5C;BraA08g029900.3.5C;BraA09g010290.3.5C;BraA09g046110.3.5C;…	22	up&down
Metabolism	Energy metabolism	ko00920	Sulfur metabolism	0.007	0.0053	1.32	0.147397	0.512367	BraA03g012810.3.5C;BraA03g032340.3.5C;BraA03g034920.3.5C;BraA03g062510.3.5C;BraA04g001430.3.5C;BraA04g008670.3.5C;BraA06g028650.3.5C;BraA06g044980.3.5C;BraA07g007340.3.5C;BraA07g009540.3.5C;BraA08g010070.3.5C;BraA08g010080.3.5C;BraA08g011370.3.5C;BraA08g022460.3.5C;BraA08g028620.3.5C;BraA09g026630.3.5C	16	up&down
Environmental Information Processing	Signal transduction	ko04016	MAPK signaling pathway - plant	0.0541	0.0496	1.09	0.152719	0.512367	BraA01g000870.3.5C;BraA01g003290.3.5C;BraA01g010190.3.5C;BraA01g013320.3.5C;BraA01g016860.3.5C;BraA01g025840.3.5C;BraA01g031400.3.5C;BraA01g031720.3.5C;BraA01g031970.3.5C;BraA01g033650.3.5C;BraA01g034050.3.5C;BraA01g036360.3.5C;BraA02g002290.3.5C;BraA02g011010.3.5C;BraA02g011820.3.5C;BraA02g012800.3.5C;BraA02g013870.3.5C;BraA02g015200.3.5C;BraA02g015520.3.5C;BraA02g020310.3.5C;BraA02g022570.3.5C;…	124	up&down
Metabolism	Energy metabolism	ko00195	Photosynthesis	0.0122	0.0101	1.21	0.155415	0.512367	BraA01g006780.3.5C;BraA01g008750.3.5C;BraA01g008860.3.5C;BraA01g012020.3.5C;BraA01g037370.3.5C;BraA02g032700.3.5C;BraA02g046280.3.5C;BraA03g025290.3.5C;BraA05g006420.3.5C;BraA05g014040.3.5C;BraA05g041750.3.5C;BraA06g005650.3.5C;BraA06g007830.3.5C;BraA06g016200.3.5C;BraA06g023760.3.5C;BraA06g023770.3.5C;BraA07g016530.3.5C;BraA07g032170.3.5C;BraA08g010500.3.5C;BraA08g019290.3.5C;BraA08g023770.3.5C;…	28	up&down
Metabolism	Carbohydrate metabolism	ko00650	Butanoate metabolism	0.0048	0.0035	1.38	0.160503	0.512367	BraA01g036130.3.5C;BraA02g026170.3.5C;BraA03g007940.3.5C;BraA04g024020.3.5C;BraA05g025850.3.5C;BraA06g016400.3.5C;BraA09g004300.3.5C;BraA09g023790.3.5C;BraA09g027730.3.5C;BraA09g049320.3.5C;BraA10g022740.3.5C	11	up&down
Metabolism	Metabolism of terpenoids and polyketides	ko00903	Limonene and pinene degradation	0.0022	0.0013	1.69	0.16225	0.512367	BraA05g029770.3.5C;BraA05g029780.3.5C;BraA06g025240.3.5C;BraA08g006090.3.5C;BraA09g029870.3.5C	5	up&down
Metabolism	Energy metabolism	ko00910	Nitrogen metabolism	0.0074	0.0058	1.27	0.175721	0.540679	BraA01g001300.3.5C;BraA01g027870.3.5C;BraA01g036090.3.5C;BraA02g002380.3.5C;BraA02g005600.3.5C;BraA02g017450.3.5C;BraA02g020390.3.5C;BraA02g025130.3.5C;BraA03g038620.3.5C;BraA05g041700.3.5C;BraA06g004890.3.5C;BraA06g004900.3.5C;BraA06g038210.3.5C;BraA08g009550.3.5C;BraA09g008690.3.5C;BraA09g046110.3.5C;BraA10g032100.3.5C	17	up&down
Metabolism	Lipid metabolism	ko00072	Synthesis and degradation of ketone bodies	0.0013	0.0007	1.93	0.19493	0.560139	BraA09g004300.3.5C;BraA09g023790.3.5C;BraA09g027730.3.5C	3	up&down
Metabolism	Carbohydrate metabolism	ko00630	Glyoxylate and dicarboxylate metabolism	0.0157	0.0137	1.15	0.203769	0.560139	BraA01g001300.3.5C;BraA01g003290.3.5C;BraA01g005620.3.5C;BraA01g019320.3.5C;BraA01g020730.3.5C;BraA01g036090.3.5C;BraA01g038610.3.5C;BraA02g017450.3.5C;BraA02g017890.3.5C;BraA02g026840.3.5C;BraA03g004420.3.5C;BraA03g038620.3.5C;BraA03g044220.3.5C;BraA04g015760.3.5C;BraA05g009780.3.5C;BraA06g016400.3.5C;BraA06g021460.3.5C;BraA06g038210.3.5C;BraA07g014640.3.5C;BraA07g020230.3.5C;BraA07g024410.3.5C;…	36	up&down
Metabolism	Nucleotide metabolism	ko00230	Purine metabolism	0.0196	0.0174	1.13	0.208686	0.560139	BraA01g009970.3.5C;BraA01g035650.3.5C;BraA02g018260.3.5C;BraA02g022100.3.5C;BraA02g029690.3.5C;BraA02g033060.3.5C;BraA02g041090.3.5C;BraA03g000890.3.5C;BraA03g047870.3.5C;BraA03g049870.3.5C;BraA03g062510.3.5C;BraA04g007030.3.5C;BraA04g008960.3.5C;BraA05g018670.3.5C;BraA06g000200.3.5C;BraA06g031850.3.5C;BraA06g044980.3.5C;BraA07g004600.3.5C;BraA07g007340.3.5C;BraA07g009760.3.5C;BraA07g023650.3.5C;…	45	up&down
Metabolism	Biosynthesis of other secondary metabolites	ko00943	Isoflavonoid biosynthesis	0.0026	0.0018	1.48	0.208887	0.560139	BraA03g061910.3.5C;BraA03g061920.3.5C;BraA04g031810.3.5C;BraA05g005080.3.5C;BraA07g017130.3.5C;BraA08g035620.3.5C	6	up&down
Metabolism	Carbohydrate metabolism	ko00052	Galactose metabolism	0.0214	0.0191	1.12	0.213944	0.560139	BraA01g002340.3.5C;BraA01g004950.3.5C;BraA01g014700.3.5C;BraA01g014720.3.5C;BraA01g016960.3.5C;BraA01g019640.3.5C;BraA01g021930.3.5C;BraA01g039100.3.5C;BraA01g044930.3.5C;BraA02g002750.3.5C;BraA02g008900.3.5C;BraA02g012990.3.5C;BraA02g036480.3.5C;BraA02g036560.3.5C;BraA02g046150.3.5C;BraA02g047570.3.5C;BraA03g012750.3.5C;BraA03g018790.3.5C;BraA03g018810.3.5C;BraA03g045000.3.5C;BraA04g007170.3.5C;…	49	up&down
Genetic Information Processing	Replication and repair	ko03410	Base excision repair	0.0078	0.0065	1.22	0.217525	0.560139	BraA01g002550.3.5C;BraA01g025220.3.5C;BraA02g032590.3.5C;BraA03g016660.3.5C;BraA03g022020.3.5C;BraA04g030820.3.5C;BraA05g014890.3.5C;BraA05g035440.3.5C;BraA06g005420.3.5C;BraA06g009900.3.5C;BraA07g018790.3.5C;BraA07g026980.3.5C;BraA07g042710.3.5C;BraA07g043640.3.5C;BraA09g065210.3.5C;BraA09g066010.3.5C;BraA10g022660.3.5C;Brassica_rapa_newGene_1731	18	up&down
Metabolism	Amino acid metabolism	ko00300	Lysine biosynthesis	0.0039	0.0029	1.34	0.217686	0.560139	BraA01g004520.3.5C;BraA02g013950.3.5C;BraA03g023290.3.5C;BraA04g032480.3.5C;BraA04g032660.3.5C;BraA05g005140.3.5C;BraA08g030610.3.5C;BraA09g046520.3.5C;BraA10g019810.3.5C	9	up
Metabolism	Global and overview maps	ko01230	Biosynthesis of amino acids	0.0401	0.0372	1.08	0.222987	0.560139	BraA01g004520.3.5C;BraA01g005620.3.5C;BraA01g014720.3.5C;BraA01g036090.3.5C;BraA01g039870.3.5C;BraA01g043300.3.5C;BraA02g007530.3.5C;BraA02g013950.3.5C;BraA02g017450.3.5C;BraA02g020920.3.5C;BraA02g025250.3.5C;BraA02g026590.3.5C;BraA02g041570.3.5C;BraA03g005810.3.5C;BraA03g006560.3.5C;BraA03g012810.3.5C;BraA03g018980.3.5C;BraA03g019080.3.5C;BraA03g021010.3.5C;BraA03g023290.3.5C;BraA03g026980.3.5C;…	92	up&down
Metabolism	Lipid metabolism	ko00600	Sphingolipid metabolism	0.0122	0.0105	1.16	0.224055	0.560139	BraA01g002270.3.5C;BraA01g002340.3.5C;BraA01g016960.3.5C;BraA01g019640.3.5C;BraA01g039100.3.5C;BraA02g002750.3.5C;BraA02g007310.3.5C;BraA02g012990.3.5C;BraA02g030150.3.5C;BraA02g036480.3.5C;BraA02g036560.3.5C;BraA02g046150.3.5C;BraA02g047570.3.5C;BraA03g012750.3.5C;BraA04g007170.3.5C;BraA04g028140.3.5C;BraA05g034280.3.5C;BraA06g044700.3.5C;BraA07g019510.3.5C;BraA07g031920.3.5C;BraA07g034400.3.5C;…	28	up&down
Metabolism	Biosynthesis of other secondary metabolites	ko00901	Indole alkaloid biosynthesis	0.0026	0.0018	1.43	0.235729	0.563231	BraA02g022850.3.5C;BraA03g021940.3.5C;BraA04g003860.3.5C;BraA04g003890.3.5C;BraA07g000440.3.5C;BraA09g049580.3.5C	6	up&down
Metabolism	Biosynthesis of other secondary metabolites	ko00942	Anthocyanin biosynthesis	0.0013	0.0007	1.75	0.238824	0.563231	BraA06g022200.3.5C;BraA08g010150.3.5C;BraA10g012490.3.5C	3	up
Metabolism	Lipid metabolism	ko00100	Steroid biosynthesis	0.0061	0.005	1.23	0.239373	0.563231	BraA01g003650.3.5C;BraA01g013400.3.5C;BraA02g044100.3.5C;BraA02g044110.3.5C;BraA04g022280.3.5C;BraA05g028430.3.5C;BraA06g003420.3.5C;BraA06g032820.3.5C;BraA08g032030.3.5C;BraA09g006390.3.5C;BraA09g055130.3.5C;BraA09g058880.3.5C;BraA10g006140.3.5C;BraA10g032220.3.5C	14	up&down
Metabolism	Lipid metabolism	ko00073	Cutin, suberine and wax biosynthesis	0.0096	0.0082	1.17	0.247164	0.570379	BraA02g021490.3.5C;BraA02g022150.3.5C;BraA02g023570.3.5C;BraA02g027310.3.5C;BraA03g001720.3.5C;BraA03g020550.3.5C;BraA04g004130.3.5C;BraA04g014520.3.5C;BraA04g027940.3.5C;BraA05g014860.3.5C;BraA05g015270.3.5C;BraA05g023880.3.5C;BraA06g018820.3.5C;BraA06g038830.3.5C;BraA08g016930.3.5C;BraA09g000610.3.5C;BraA09g019210.3.5C;BraA09g019230.3.5C;BraA09g019250.3.5C;BraA09g049190.3.5C;BraA10g019000.3.5C;…	22	up&down
Metabolism	Amino acid metabolism	ko00270	Cysteine and methionine metabolism	0.0183	0.0165	1.11	0.253881	0.574825	BraA02g000700.3.5C;BraA02g013950.3.5C;BraA02g024770.3.5C;BraA02g047370.3.5C;BraA03g012810.3.5C;BraA03g019080.3.5C;BraA03g032340.3.5C;BraA04g001430.3.5C;BraA04g008760.3.5C;BraA04g012980.3.5C;BraA04g017910.3.5C;BraA04g027350.3.5C;BraA05g000730.3.5C;BraA05g013860.3.5C;BraA05g015450.3.5C;BraA05g025250.3.5C;BraA05g042350.3.5C;BraA06g008160.3.5C;BraA06g009650.3.5C;BraA06g017940.3.5C;BraA06g035380.3.5C;…	42	up&down
Metabolism	Lipid metabolism	ko01040	Biosynthesis of unsaturated fatty acids	0.0039	0.0031	1.28	0.260154	0.576861	BraA01g025510.3.5C;BraA02g010910.3.5C;BraA02g041590.3.5C;BraA03g004390.3.5C;BraA03g030530.3.5C;BraA05g003790.3.5C;BraA05g040040.3.5C;BraA09g045010.3.5C;BraA10g027470.3.5C	9	up&down
Metabolism	Metabolism of cofactors and vitamins	ko00760	Nicotinate and nicotinamide metabolism	0.0044	0.0035	1.26	0.264395	0.576861	BraA01g033790.3.5C;BraA02g022100.3.5C;BraA02g025610.3.5C;BraA03g009440.3.5C;BraA03g013240.3.5C;BraA03g061790.3.5C;BraA05g009050.3.5C;BraA07g025630.3.5C;BraA07g034180.3.5C;BraA08g011380.3.5C	10	up&down
Metabolism	Amino acid metabolism	ko00380	Tryptophan metabolism	0.0144	0.0129	1.12	0.274381	0.587958	BraA01g003290.3.5C;BraA01g020730.3.5C;BraA01g032840.3.5C;BraA01g037850.3.5C;BraA02g009390.3.5C;BraA02g035180.3.5C;BraA02g042830.3.5C;BraA02g042850.3.5C;BraA02g043120.3.5C;BraA02g047370.3.5C;BraA03g013620.3.5C;BraA03g027870.3.5C;BraA05g014480.3.5C;BraA05g029770.3.5C;BraA05g029780.3.5C;BraA06g022570.3.5C;BraA06g025240.3.5C;BraA07g000440.3.5C;BraA07g039150.3.5C;BraA08g006090.3.5C;BraA08g011510.3.5C;…	33	up&down
Metabolism	Biosynthesis of other secondary metabolites	ko00965	Betalain biosynthesis	0.0039	0.0031	1.26	0.282303	0.589286	BraA02g023450.3.5C;BraA02g036890.3.5C;BraA05g016120.3.5C;BraA05g016130.3.5C;BraA07g000440.3.5C;BraA07g035570.3.5C;BraA07g039960.3.5C;BraA08g011610.3.5C;BraA09g061170.3.5C	9	up&down
Metabolism	Amino acid metabolism	ko00340	Histidine metabolism	0.0048	0.0039	1.22	0.287366	0.589286	BraA02g041570.3.5C;BraA03g045990.3.5C;BraA05g029770.3.5C;BraA05g029780.3.5C;BraA06g025240.3.5C;BraA06g036570.3.5C;BraA08g006090.3.5C;BraA08g035210.3.5C;BraA09g004540.3.5C;BraA09g019680.3.5C;BraA09g029870.3.5C	11	up&down
Environmental Information Processing	Signal transduction	ko04070	Phosphatidylinositol signaling system	0.0153	0.0139	1.1	0.292841	0.589286	BraA01g010550.3.5C;BraA01g019410.3.5C;BraA01g038720.3.5C;BraA01g046130.3.5C;BraA02g011710.3.5C;BraA02g016160.3.5C;BraA03g003260.3.5C;BraA03g005510.3.5C;BraA03g043140.3.5C;BraA03g059120.3.5C;BraA04g004450.3.5C;BraA04g009100.3.5C;BraA04g012810.3.5C;BraA05g015350.3.5C;BraA05g033010.3.5C;BraA06g002960.3.5C;BraA06g019650.3.5C;BraA06g022010.3.5C;BraA06g022470.3.5C;BraA06g024090.3.5C;BraA06g028650.3.5C;…	35	up&down
Genetic Information Processing	Replication and repair	ko03030	DNA replication	0.0214	0.0198	1.08	0.297682	0.589286	BraA01g025880.3.5C;BraA01g037400.3.5C;BraA01g041590.3.5C;BraA02g018130.3.5C;BraA02g024840.3.5C;BraA02g032730.3.5C;BraA02g033860.3.5C;BraA02g044180.3.5C;BraA03g003270.3.5C;BraA03g029730.3.5C;BraA03g035240.3.5C;BraA03g042610.3.5C;BraA03g043650.3.5C;BraA03g049290.3.5C;BraA03g050040.3.5C;BraA03g057340.3.5C;BraA03g058650.3.5C;BraA04g015440.3.5C;BraA04g019080.3.5C;BraA04g024640.3.5C;BraA04g030820.3.5C;…	49	up&down
Metabolism	Metabolism of cofactors and vitamins	ko00785	Lipoic acid metabolism	0.0009	0.0005	1.83	0.299554	0.589286	BraA01g006770.3.5C;BraA08g018230.3.5C	2	down
Metabolism	Metabolism of terpenoids and polyketides	ko00909	Sesquiterpenoid and triterpenoid biosynthesis	0.0044	0.0036	1.21	0.306608	0.593435	BraA01g003650.3.5C;BraA02g044100.3.5C;BraA02g044110.3.5C;BraA03g064410.3.5C;BraA04g014290.3.5C;BraA06g032820.3.5C;BraA07g042970.3.5C;BraA09g006390.3.5C;Brassica_rapa_newGene_1122;Brassica_rapa_newGene_271	10	up&down
Metabolism	Amino acid metabolism	ko00310	Lysine degradation	0.0078	0.007	1.12	0.336211	0.638764	BraA01g004910.3.5C;BraA01g020730.3.5C;BraA02g034930.3.5C;BraA03g013620.3.5C;BraA03g058680.3.5C;BraA05g029770.3.5C;BraA05g029780.3.5C;BraA05g043180.3.5C;BraA06g025240.3.5C;BraA07g003010.3.5C;BraA07g038340.3.5C;BraA08g006090.3.5C;BraA08g018400.3.5C;BraA09g004300.3.5C;BraA09g023790.3.5C;BraA09g029870.3.5C;BraA09g067420.3.5C;BraA10g031380.3.5C	18	up&down
Metabolism	Global and overview maps	ko01200	Carbon metabolism	0.0406	0.0389	1.04	0.340677	0.638764	BraA01g001100.3.5C;BraA01g001300.3.5C;BraA01g003290.3.5C;BraA01g005620.3.5C;BraA01g012740.3.5C;BraA01g014720.3.5C;BraA01g015430.3.5C;BraA01g020730.3.5C;BraA01g021320.3.5C;BraA01g038610.3.5C;BraA01g039870.3.5C;BraA02g002380.3.5C;BraA02g004150.3.5C;BraA02g017890.3.5C;BraA02g020920.3.5C;BraA02g025250.3.5C;BraA02g026840.3.5C;BraA02g043540.3.5C;BraA03g004780.3.5C;BraA03g005810.3.5C;BraA03g008900.3.5C;…	93	up&down
Metabolism	Biosynthesis of other secondary metabolites	ko00966	Glucosinolate biosynthesis	0.0052	0.0046	1.15	0.347396	0.638764	BraA03g044240.3.5C;BraA04g030700.3.5C;BraA05g003410.3.5C;BraA06g014350.3.5C;BraA06g017940.3.5C;BraA07g039150.3.5C;BraA08g022450.3.5C;BraA08g032900.3.5C;BraA09g012560.3.5C;BraA09g018900.3.5C;BraA09g018960.3.5C;BraA09g040970.3.5C	12	up&down
Metabolism	Metabolism of cofactors and vitamins	ko00670	One carbon pool by folate	0.0039	0.0033	1.18	0.35132	0.638764	BraA01g005620.3.5C;BraA01g019320.3.5C;BraA02g033060.3.5C;BraA03g035720.3.5C;BraA03g043560.3.5C;BraA05g019480.3.5C;BraA06g000200.3.5C;BraA07g037060.3.5C;BraA08g008020.3.5C	9	up&down
Cellular Processes	Transport and catabolism	ko04146	Peroxisome	0.0157	0.0148	1.06	0.378472	0.677861	BraA01g003290.3.5C;BraA01g031170.3.5C;BraA01g035880.3.5C;BraA01g038610.3.5C;BraA02g041590.3.5C;BraA03g009440.3.5C;BraA03g015620.3.5C;BraA03g028460.3.5C;BraA03g032490.3.5C;BraA03g047150.3.5C;BraA03g047180.3.5C;BraA04g004130.3.5C;BraA04g022580.3.5C;BraA05g000600.3.5C;BraA05g020330.3.5C;BraA05g039210.3.5C;BraA05g042260.3.5C;BraA06g001790.3.5C;BraA06g017980.3.5C;BraA06g031970.3.5C;BraA08g002880.3.5C;…	36	up&down
Metabolism	Lipid metabolism	ko00590	Arachidonic acid metabolism	0.0044	0.0039	1.13	0.394784	0.694116	BraA01g000540.3.5C;BraA02g005020.3.5C;BraA03g047150.3.5C;BraA03g047180.3.5C;BraA05g017360.3.5C;BraA07g001120.3.5C;BraA09g000270.3.5C;BraA10g001490.3.5C;BraA10g025390.3.5C;BraA10g032220.3.5C	10	up&down
Metabolism	Amino acid metabolism	ko00400	Phenylalanine, tyrosine and tryptophan biosynthesis	0.0083	0.0077	1.07	0.412641	0.694116	BraA01g043300.3.5C;BraA02g007530.3.5C;BraA03g033800.3.5C;BraA05g013860.3.5C;BraA05g015450.3.5C;BraA05g040170.3.5C;BraA06g005980.3.5C;BraA06g024350.3.5C;BraA06g037810.3.5C;BraA06g045030.3.5C;BraA07g020340.3.5C;BraA08g004180.3.5C;BraA08g027440.3.5C;BraA08g031960.3.5C;BraA08g032120.3.5C;BraA09g001660.3.5C;BraA09g003980.3.5C;BraA09g047340.3.5C;BraA10g028530.3.5C	19	up&down
Metabolism	Carbohydrate metabolism	ko00620	Pyruvate metabolism	0.014	0.0133	1.05	0.415405	0.694116	BraA01g001100.3.5C;BraA01g020730.3.5C;BraA01g021320.3.5C;BraA02g004150.3.5C;BraA02g043540.3.5C;BraA03g004780.3.5C;BraA03g008900.3.5C;BraA03g011960.3.5C;BraA03g044220.3.5C;BraA03g062330.3.5C;BraA04g007030.3.5C;BraA04g031480.3.5C;BraA05g029770.3.5C;BraA05g029780.3.5C;BraA05g033230.3.5C;BraA06g005510.3.5C;BraA06g014830.3.5C;BraA06g016400.3.5C;BraA06g025240.3.5C;BraA06g034290.3.5C;BraA07g000880.3.5C;…	32	up&down
Metabolism	Metabolism of other amino acids	ko00430	Taurine and hypotaurine metabolism	0.0017	0.0014	1.22	0.418086	0.694116	BraA01g000540.3.5C;BraA01g036130.3.5C;BraA03g007940.3.5C;BraA10g022740.3.5C	4	down
Genetic Information Processing	Folding, sorting and degradation	ko04122	Sulfur relay system	0.0017	0.0014	1.22	0.418086	0.694116	BraA02g013820.3.5C;BraA03g061570.3.5C;BraA04g032580.3.5C;BraA07g040730.3.5C	4	up&down
Metabolism	Metabolism of cofactors and vitamins	ko00740	Riboflavin metabolism	0.0039	0.0035	1.11	0.422254	0.694116	BraA01g036110.3.5C;BraA02g010930.3.5C;BraA03g003500.3.5C;BraA03g023300.3.5C;BraA06g041460.3.5C;BraA06g041470.3.5C;BraA07g025630.3.5C;BraA07g026350.3.5C;BraA08g030640.3.5C	9	up&down
Metabolism	Lipid metabolism	ko00071	Fatty acid degradation	0.0078	0.0074	1.06	0.433399	0.702809	BraA01g012740.3.5C;BraA02g041590.3.5C;BraA02g043730.3.5C;BraA03g055810.3.5C;BraA04g008080.3.5C;BraA05g000600.3.5C;BraA05g020330.3.5C;BraA05g029770.3.5C;BraA05g029780.3.5C;BraA06g017980.3.5C;BraA06g025240.3.5C;BraA07g041580.3.5C;BraA08g006090.3.5C;BraA08g010960.3.5C;BraA09g004300.3.5C;BraA09g023790.3.5C;BraA09g029870.3.5C;BraA09g045010.3.5C	18	up&down
Metabolism	Amino acid metabolism	ko00220	Arginine biosynthesis	0.0057	0.0053	1.07	0.442375	0.7078	BraA01g036090.3.5C;BraA02g002380.3.5C;BraA02g017450.3.5C;BraA02g018260.3.5C;BraA02g026590.3.5C;BraA03g026980.3.5C;BraA03g038620.3.5C;BraA05g013860.3.5C;BraA07g014640.3.5C;BraA07g036470.3.5C;BraA08g009550.3.5C;BraA08g029900.3.5C;BraA09g046110.3.5C	13	up&down
Metabolism	Glycan biosynthesis and metabolism	ko00603	Glycosphingolipid biosynthesis - globo and isoglobo series	0.0017	0.0015	1.17	0.455274	0.718854	BraA01g019640.3.5C;BraA02g002750.3.5C;BraA05g038360.3.5C;BraA10g033680.3.5C	4	up&down
Metabolism	Glycan biosynthesis and metabolism	ko00601	Glycosphingolipid biosynthesis - lacto and neolacto series	0.0009	0.0007	1.28	0.476779	0.729061	BraA05g038360.3.5C;BraA10g033680.3.5C	2	up&down
Metabolism	Metabolism of terpenoids and polyketides	ko00902	Monoterpenoid biosynthesis	0.0009	0.0007	1.28	0.476779	0.729061	BraA03g025940.3.5C;BraA10g000220.3.5C	2	up&down
Metabolism	Carbohydrate metabolism	ko00051	Fructose and mannose metabolism	0.0096	0.0094	1.02	0.488909	0.729061	BraA01g014720.3.5C;BraA01g022730.3.5C;BraA01g045290.3.5C;BraA02g017880.3.5C;BraA03g027680.3.5C;BraA05g018240.3.5C;BraA06g003310.3.5C;BraA06g029030.3.5C;BraA06g042300.3.5C;BraA07g033530.3.5C;BraA07g035190.3.5C;BraA08g010830.3.5C;BraA08g024920.3.5C;BraA09g009870.3.5C;BraA09g009900.3.5C;BraA09g013480.3.5C;BraA09g026920.3.5C;BraA09g027570.3.5C;BraA09g046940.3.5C;BraA09g057310.3.5C;BraA09g057450.3.5C;…	22	up&down
Metabolism	Metabolism of cofactors and vitamins	ko00860	Porphyrin and chlorophyll metabolism	0.0074	0.0072	1.03	0.488948	0.729061	BraA01g001850.3.5C;BraA01g026440.3.5C;BraA02g002680.3.5C;BraA02g011940.3.5C;BraA03g001880.3.5C;BraA03g003430.3.5C;BraA03g048960.3.5C;BraA03g065870.3.5C;BraA04g014330.3.5C;BraA05g036980.3.5C;BraA05g038250.3.5C;BraA06g005750.3.5C;BraA07g023310.3.5C;BraA07g039450.3.5C;BraA08g003210.3.5C;BraA10g002130.3.5C;BraA10g024880.3.5C	17	up&down
Metabolism	Carbohydrate metabolism	ko00030	Pentose phosphate pathway	0.0083	0.0081	1.03	0.492116	0.729061	BraA01g014720.3.5C;BraA01g015430.3.5C;BraA02g020920.3.5C;BraA03g005810.3.5C;BraA04g018840.3.5C;BraA05g018240.3.5C;BraA05g041500.3.5C;BraA06g029030.3.5C;BraA06g033080.3.5C;BraA06g042300.3.5C;BraA08g010830.3.5C;BraA08g024920.3.5C;BraA08g025570.3.5C;BraA09g006350.3.5C;BraA09g026920.3.5C;BraA09g052340.3.5C;BraA09g057310.3.5C;BraA09g061860.3.5C;Brassica_rapa_newGene_353	19	up&down
Metabolism	Carbohydrate metabolism	ko00040	Pentose and glucuronate interconversions	0.0331	0.0332	1	0.528399	0.773266	BraA01g004950.3.5C;BraA01g016070.3.5C;BraA01g021930.3.5C;BraA01g025340.3.5C;BraA01g038680.3.5C;BraA01g038690.3.5C;BraA01g041220.3.5C;BraA01g044930.3.5C;BraA02g002360.3.5C;BraA02g003190.3.5C;BraA02g013490.3.5C;BraA02g015060.3.5C;BraA02g018380.3.5C;BraA02g024510.3.5C;BraA02g024520.3.5C;BraA02g033200.3.5C;BraA02g036140.3.5C;BraA02g040120.3.5C;BraA02g041760.3.5C;BraA02g045540.3.5C;BraA03g006920.3.5C;…	76	up&down
Metabolism	Metabolism of other amino acids	ko00410	beta-Alanine metabolism	0.0083	0.0083	1	0.539001	0.779279	BraA01g036130.3.5C;BraA03g005930.3.5C;BraA03g007940.3.5C;BraA03g022610.3.5C;BraA03g028460.3.5C;BraA04g009400.3.5C;BraA04g031040.3.5C;BraA05g003330.3.5C;BraA05g029770.3.5C;BraA05g029780.3.5C;BraA06g025240.3.5C;BraA07g016080.3.5C;BraA08g006090.3.5C;BraA08g010320.3.5C;BraA08g022670.3.5C;BraA08g034500.3.5C;BraA09g029870.3.5C;BraA09g045010.3.5C;BraA10g022740.3.5C	19	up&down
Metabolism	Amino acid metabolism	ko00290	Valine, leucine and isoleucine biosynthesis	0.0031	0.0031	1	0.564753	0.790125	BraA03g034120.3.5C;BraA04g024020.3.5C;BraA05g003400.3.5C;BraA05g003410.3.5C;BraA06g017940.3.5C;BraA08g032900.3.5C;BraA09g058860.3.5C	7	up&down
Metabolism	Metabolism of cofactors and vitamins	ko00730	Thiamine metabolism	0.0031	0.0031	1	0.564753	0.790125	BraA03g040300.3.5C;BraA03g044900.3.5C;BraA04g029340.3.5C;BraA06g009360.3.5C;BraA08g033710.3.5C;BraA09g004200.3.5C;BraA09g062670.3.5C	7	up&down
Genetic Information Processing	Replication and repair	ko03430	Mismatch repair	0.017	0.0173	0.99	0.566256	0.790125	BraA01g025880.3.5C;BraA01g037400.3.5C;BraA01g041590.3.5C;BraA02g024840.3.5C;BraA02g027970.3.5C;BraA02g032730.3.5C;BraA02g044180.3.5C;BraA03g003270.3.5C;BraA03g035240.3.5C;BraA03g038860.3.5C;BraA03g049290.3.5C;BraA03g057340.3.5C;BraA03g058650.3.5C;BraA03g060700.3.5C;BraA04g019080.3.5C;BraA04g024640.3.5C;BraA04g030820.3.5C;BraA05g011080.3.5C;BraA05g014890.3.5C;BraA05g029690.3.5C;BraA06g005420.3.5C;…	39	up&down
Metabolism	Amino acid metabolism	ko00330	Arginine and proline metabolism	0.0126	0.0131	0.96	0.614736	0.842473	BraA01g003590.3.5C;BraA01g003600.3.5C;BraA02g035180.3.5C;BraA03g005930.3.5C;BraA03g006560.3.5C;BraA03g021010.3.5C;BraA03g022610.3.5C;BraA03g026980.3.5C;BraA04g015900.3.5C;BraA04g015910.3.5C;BraA04g015990.3.5C;BraA04g029140.3.5C;BraA05g003330.3.5C;BraA05g013860.3.5C;BraA05g014480.3.5C;BraA05g029770.3.5C;BraA05g029780.3.5C;BraA05g042350.3.5C;BraA06g025240.3.5C;BraA06g037620.3.5C;BraA07g020480.3.5C;…	29	up&down
Metabolism	Metabolism of other amino acids	ko00440	Phosphonate and phosphinate metabolism	0.0013	0.0014	0.96	0.622701	0.842473	BraA02g037800.3.5C;BraA04g028470.3.5C;BraA09g061950.3.5C	3	up
Metabolism	Glycan biosynthesis and metabolism	ko00514	Other types of O-glycan biosynthesis	0.0017	0.0018	0.95	0.624834	0.842473	BraA04g019760.3.5C;BraA05g002290.3.5C;BraA08g028850.3.5C;BraA10g025410.3.5C	4	up&down
Metabolism	Metabolism of cofactors and vitamins	ko00790	Folate biosynthesis	0.0035	0.0037	0.93	0.640574	0.854099	BraA02g010930.3.5C;BraA03g042390.3.5C;BraA03g043560.3.5C;BraA04g032580.3.5C;BraA05g036230.3.5C;BraA05g039480.3.5C;BraA09g029570.3.5C;BraA09g065940.3.5C	8	up&down
Metabolism	Carbohydrate metabolism	ko00640	Propanoate metabolism	0.0057	0.0062	0.92	0.677063	0.868926	BraA01g020730.3.5C;BraA02g043540.3.5C;BraA03g003900.3.5C;BraA03g028460.3.5C;BraA03g044220.3.5C;BraA04g009400.3.5C;BraA08g008070.3.5C;BraA08g022670.3.5C;BraA08g034500.3.5C;BraA09g004300.3.5C;BraA09g023790.3.5C;BraA09g027770.3.5C;BraA09g045010.3.5C	13	up&down
Metabolism	Nucleotide metabolism	ko00240	Pyrimidine metabolism	0.0092	0.0098	0.93	0.677085	0.868926	BraA01g013640.3.5C;BraA01g024630.3.5C;BraA01g039940.3.5C;BraA02g022100.3.5C;BraA02g029690.3.5C;BraA03g043560.3.5C;BraA03g044200.3.5C;BraA03g050030.3.5C;BraA04g014400.3.5C;BraA05g009050.3.5C;BraA05g010140.3.5C;BraA06g020530.3.5C;BraA07g009760.3.5C;BraA07g025630.3.5C;BraA08g000450.3.5C;BraA08g011380.3.5C;BraA09g006780.3.5C;BraA09g028640.3.5C;BraA09g051900.3.5C;BraA10g029910.3.5C;Brassica_rapa_newGe…	21	up&down
Metabolism	Metabolism of cofactors and vitamins	ko00770	Pantothenate and CoA biosynthesis	0.0061	0.0067	0.92	0.680272	0.868926	BraA03g022610.3.5C;BraA03g038710.3.5C;BraA04g024020.3.5C;BraA05g003330.3.5C;BraA05g029770.3.5C;BraA05g029780.3.5C;BraA05g030500.3.5C;BraA06g017940.3.5C;BraA06g025240.3.5C;BraA06g031760.3.5C;BraA07g025630.3.5C;BraA08g006090.3.5C;BraA08g032900.3.5C;BraA09g029870.3.5C	14	up&down
Metabolism	Global and overview maps	ko01212	Fatty acid metabolism	0.0096	0.0103	0.93	0.680659	0.868926	BraA01g025510.3.5C;BraA01g044520.3.5C;BraA02g010910.3.5C;BraA02g041590.3.5C;BraA02g043540.3.5C;BraA03g004390.3.5C;BraA03g055810.3.5C;BraA04g005160.3.5C;BraA04g017170.3.5C;BraA05g000600.3.5C;BraA05g003790.3.5C;BraA05g020330.3.5C;BraA05g040040.3.5C;BraA06g017980.3.5C;BraA07g014330.3.5C;BraA08g008070.3.5C;BraA08g033740.3.5C;BraA09g004300.3.5C;BraA09g023790.3.5C;BraA09g027770.3.5C;BraA09g045010.3.5C;…	22	up&down
Metabolism	Lipid metabolism	ko00061	Fatty acid biosynthesis	0.0061	0.0067	0.91	0.695247	0.878207	BraA01g025510.3.5C;BraA01g044520.3.5C;BraA02g043540.3.5C;BraA03g041950.3.5C;BraA04g005160.3.5C;BraA04g017170.3.5C;BraA05g000600.3.5C;BraA05g003790.3.5C;BraA05g020330.3.5C;BraA06g017980.3.5C;BraA07g014330.3.5C;BraA08g008070.3.5C;BraA08g033740.3.5C;BraA09g027770.3.5C	14	up&down
Metabolism	Metabolism of cofactors and vitamins	ko00750	Vitamin B6 metabolism	0.0013	0.0016	0.8	0.745494	0.895522	BraA08g034440.3.5C;BraA09g011340.3.5C;BraA09g012290.3.5C	3	up&down
Metabolism	Metabolism of terpenoids and polyketides	ko00900	Terpenoid backbone biosynthesis	0.0061	0.007	0.87	0.750831	0.895522	BraA01g019880.3.5C;BraA02g035480.3.5C;BraA02g036860.3.5C;BraA03g011750.3.5C;BraA03g040300.3.5C;BraA06g042330.3.5C;BraA07g003670.3.5C;BraA07g039450.3.5C;BraA07g042580.3.5C;BraA09g004300.3.5C;BraA09g015280.3.5C;BraA09g023790.3.5C;BraA09g027730.3.5C;BraA09g047090.3.5C	14	up&down
Genetic Information Processing	Replication and repair	ko03440	Homologous recombination	0.0201	0.0219	0.91	0.770032	0.895522	BraA01g025880.3.5C;BraA01g026260.3.5C;BraA01g037400.3.5C;BraA01g041590.3.5C;BraA02g023870.3.5C;BraA02g032730.3.5C;BraA02g044180.3.5C;BraA02g046210.3.5C;BraA03g000230.3.5C;BraA03g003270.3.5C;BraA03g009860.3.5C;BraA03g029670.3.5C;BraA03g035240.3.5C;BraA03g041590.3.5C;BraA03g049290.3.5C;BraA03g057340.3.5C;BraA03g058650.3.5C;BraA04g019080.3.5C;BraA04g024640.3.5C;BraA04g030820.3.5C;BraA05g011080.3.5C;…	46	up&down
Metabolism	Metabolism of cofactors and vitamins	ko00130	Ubiquinone and other terpenoid-quinone biosynthesis	0.0065	0.0076	0.86	0.775861	0.895522	BraA03g013940.3.5C;BraA03g016180.3.5C;BraA03g040110.3.5C;BraA04g022890.3.5C;BraA04g022900.3.5C;BraA05g014090.3.5C;BraA05g015450.3.5C;BraA05g026760.3.5C;BraA06g036420.3.5C;BraA07g032570.3.5C;BraA07g035460.3.5C;BraA09g013200.3.5C;BraA09g065660.3.5C;BraA10g005230.3.5C;BraA10g012880.3.5C	15	up&down
Genetic Information Processing	Replication and repair	ko03420	Nucleotide excision repair	0.0183	0.0202	0.91	0.777116	0.895522	BraA01g025880.3.5C;BraA01g037400.3.5C;BraA01g041590.3.5C;BraA02g011670.3.5C;BraA02g024840.3.5C;BraA02g032730.3.5C;BraA02g042530.3.5C;BraA02g044180.3.5C;BraA03g003270.3.5C;BraA03g035240.3.5C;BraA03g049290.3.5C;BraA03g057340.3.5C;BraA03g058650.3.5C;BraA04g014630.3.5C;BraA04g019080.3.5C;BraA04g024640.3.5C;BraA04g030820.3.5C;BraA05g011080.3.5C;BraA05g014890.3.5C;BraA06g005420.3.5C;BraA06g005500.3.5C;…	42	up&down
Metabolism	Carbohydrate metabolism	ko00660	C5-Branched dibasic acid metabolism	0.0009	0.0013	0.68	0.819648	0.895522	BraA04g024020.3.5C;BraA05g003400.3.5C	2	up&down
Metabolism	Metabolism of terpenoids and polyketides	ko00906	Carotenoid biosynthesis	0.0048	0.006	0.8	0.827187	0.895522	BraA01g010600.3.5C;BraA02g032970.3.5C;BraA03g012640.3.5C;BraA03g053660.3.5C;BraA04g008500.3.5C;BraA05g018140.3.5C;BraA07g021850.3.5C;BraA08g016680.3.5C;BraA08g023540.3.5C;BraA09g067100.3.5C;BraA10g026870.3.5C	11	up&down
Metabolism	Lipid metabolism	ko00565	Ether lipid metabolism	0.0035	0.0045	0.78	0.827189	0.895522	BraA01g043710.3.5C;BraA02g037800.3.5C;BraA04g020490.3.5C;BraA05g017360.3.5C;BraA05g018990.3.5C;BraA07g001120.3.5C;BraA09g061950.3.5C;BraA10g032220.3.5C	8	up&down
Genetic Information Processing	Replication and repair	ko03450	Non-homologous end-joining	0.0004	0.0007	0.58	0.844831	0.895522	BraA01g032040.3.5C	1	up
Metabolism	Metabolism of cofactors and vitamins	ko00780	Biotin metabolism	0.0022	0.0031	0.71	0.850821	0.895522	BraA01g044520.3.5C;BraA03g012350.3.5C;BraA03g022840.3.5C;BraA04g005160.3.5C;BraA04g017170.3.5C	5	up
Metabolism	Amino acid metabolism	ko00360	Phenylalanine metabolism	0.007	0.0088	0.79	0.878041	0.895522	BraA02g001350.3.5C;BraA02g035180.3.5C;BraA04g006770.3.5C;BraA04g027460.3.5C;BraA04g031040.3.5C;BraA05g008230.3.5C;BraA05g013860.3.5C;BraA05g014480.3.5C;BraA05g015450.3.5C;BraA07g000440.3.5C;BraA07g016080.3.5C;BraA08g010320.3.5C;BraA09g046240.3.5C;BraA09g065660.3.5C;BraA10g005230.3.5C;BraA10g029830.3.5C	16	up&down
Metabolism	Glycan biosynthesis and metabolism	ko00510	N-Glycan biosynthesis	0.0057	0.0076	0.75	0.906303	0.895522	BraA01g009780.3.5C;BraA02g001490.3.5C;BraA02g023070.3.5C;BraA02g025690.3.5C;BraA03g010660.3.5C;BraA04g003770.3.5C;BraA05g004590.3.5C;BraA06g012750.3.5C;BraA07g004610.3.5C;BraA09g008160.3.5C;BraA09g009890.3.5C;BraA09g015840.3.5C;BraA09g032530.3.5C	13	up&down
Cellular Processes	Transport and catabolism	ko04144	Endocytosis	0.027	0.0315	0.86	0.921688	0.895522	BraA01g002810.3.5C;BraA01g003020.3.5C;BraA01g003220.3.5C;BraA01g009510.3.5C;BraA01g015110.3.5C;BraA01g018600.3.5C;BraA01g039240.3.5C;BraA01g040010.3.5C;BraA01g043710.3.5C;BraA02g006480.3.5C;BraA02g010280.3.5C;BraA02g010830.3.5C;BraA03g000720.3.5C;BraA03g015000.3.5C;BraA03g016830.3.5C;BraA03g022690.3.5C;BraA03g025900.3.5C;BraA03g032560.3.5C;BraA03g035810.3.5C;BraA03g036450.3.5C;BraA03g045660.3.5C;…	62	up&down
Metabolism	Metabolism of other amino acids	ko00450	Selenocompound metabolism	0.0022	0.0037	0.59	0.938116	0.895522	BraA05g002300.3.5C;BraA06g044980.3.5C;BraA07g007340.3.5C;BraA08g028620.3.5C;BraA09g048110.3.5C	5	up&down
Metabolism	Amino acid metabolism	ko00350	Tyrosine metabolism	0.0052	0.0076	0.69	0.946021	0.895522	BraA01g012740.3.5C;BraA02g043730.3.5C;BraA04g031040.3.5C;BraA05g013860.3.5C;BraA05g015450.3.5C;BraA07g000440.3.5C;BraA07g016080.3.5C;BraA07g041580.3.5C;BraA08g010320.3.5C;BraA08g012010.3.5C;BraA09g065660.3.5C;BraA10g005230.3.5C	12	up&down
Metabolism	Biosynthesis of other secondary metabolites	ko00950	Isoquinoline alkaloid biosynthesis	0.0039	0.006	0.65	0.949015	0.895522	BraA02g019150.3.5C;BraA04g031040.3.5C;BraA05g005250.3.5C;BraA05g013860.3.5C;BraA05g015450.3.5C;BraA07g000440.3.5C;BraA07g016080.3.5C;BraA08g010320.3.5C;BraA09g041720.3.5C	9	up&down
Metabolism	Global and overview maps	ko01210	2-Oxocarboxylic acid metabolism	0.0087	0.0119	0.73	0.952858	0.895522	BraA02g013950.3.5C;BraA02g026590.3.5C;BraA03g044240.3.5C;BraA04g024020.3.5C;BraA04g030700.3.5C;BraA05g003400.3.5C;BraA05g003410.3.5C;BraA05g013860.3.5C;BraA06g017940.3.5C;BraA07g014640.3.5C;BraA07g024410.3.5C;BraA07g036470.3.5C;BraA07g039150.3.5C;BraA08g022450.3.5C;BraA08g029900.3.5C;BraA08g030610.3.5C;BraA08g032900.3.5C;BraA09g012560.3.5C;BraA09g040970.3.5C;BraA09g058860.3.5C	20	up&down
Genetic Information Processing	Folding, sorting and degradation	ko04120	Ubiquitin mediated proteolysis	0.0227	0.0277	0.82	0.955301	0.895522	BraA01g002310.3.5C;BraA01g004820.3.5C;BraA01g010900.3.5C;BraA01g012220.3.5C;BraA01g037960.3.5C;BraA01g042730.3.5C;BraA01g045240.3.5C;BraA02g011670.3.5C;BraA02g012270.3.5C;BraA02g030270.3.5C;BraA02g046170.3.5C;BraA03g006010.3.5C;BraA03g008730.3.5C;BraA03g018710.3.5C;BraA03g044330.3.5C;BraA03g058330.3.5C;BraA03g060460.3.5C;BraA04g001220.3.5C;BraA04g007310.3.5C;BraA04g007480.3.5C;BraA04g013280.3.5C;…	52	up&down
Cellular Processes	Transport and catabolism	ko04136	Autophagy - other	0.0039	0.0062	0.63	0.960693	0.895522	BraA02g007080.3.5C;BraA03g023240.3.5C;BraA03g023730.3.5C;BraA03g042550.3.5C;BraA03g047540.3.5C;BraA03g056860.3.5C;BraA03g057200.3.5C;BraA05g039250.3.5C;BraA09g021130.3.5C	9	up&down
Genetic Information Processing	Transcription	ko03020	RNA polymerase	0.0065	0.0096	0.68	0.964631	0.895522	BraA01g004600.3.5C;BraA01g019040.3.5C;BraA01g027140.3.5C;BraA02g042050.3.5C;BraA02g047280.3.5C;BraA04g007760.3.5C;BraA04g013270.3.5C;BraA05g014920.3.5C;BraA05g025700.3.5C;BraA07g011110.3.5C;BraA07g021520.3.5C;BraA07g031220.3.5C;BraA09g018740.3.5C;BraA09g023860.3.5C;Brassica_rapa_newGene_582	15	up&down
Genetic Information Processing	Folding, sorting and degradation	ko03018	RNA degradation	0.0205	0.0266	0.77	0.982652	0.895522	BraA01g004230.3.5C;BraA01g009790.3.5C;BraA01g009800.3.5C;BraA01g014720.3.5C;BraA01g018270.3.5C;BraA01g021770.3.5C;BraA02g001360.3.5C;BraA02g008640.3.5C;BraA02g011220.3.5C;BraA02g027400.3.5C;BraA03g002550.3.5C;BraA03g005590.3.5C;BraA03g010230.3.5C;BraA03g017590.3.5C;BraA03g018980.3.5C;BraA03g036400.3.5C;BraA03g036730.3.5C;BraA03g039290.3.5C;BraA04g005320.3.5C;BraA04g021220.3.5C;BraA04g025730.3.5C;…	47	up&down
Metabolism	Carbohydrate metabolism	ko00053	Ascorbate and aldarate metabolism	0.0109	0.0156	0.7	0.984474	0.895522	BraA01g004950.3.5C;BraA01g017610.3.5C;BraA02g004060.3.5C;BraA02g013160.3.5C;BraA02g013840.3.5C;BraA02g041300.3.5C;BraA02g041970.3.5C;BraA03g006920.3.5C;BraA03g027020.3.5C;BraA03g041830.3.5C;BraA03g045000.3.5C;BraA04g032730.3.5C;BraA05g001090.3.5C;BraA05g029770.3.5C;BraA05g029780.3.5C;BraA06g016300.3.5C;BraA06g025240.3.5C;BraA06g039460.3.5C;BraA08g006090.3.5C;BraA08g028820.3.5C;BraA09g029870.3.5C;…	25	up&down
Genetic Information Processing	Translation	ko03010	Ribosome	0.0379	0.0467	0.81	0.988037	0.895522	BraA01g014410.3.5C;BraA02g000600.3.5C;BraA02g005970.3.5C;BraA02g014110.3.5C;BraA02g025120.3.5C;BraA02g041510.3.5C;BraA03g001810.3.5C;BraA03g004970.3.5C;BraA03g006300.3.5C;BraA03g009530.3.5C;BraA03g010340.3.5C;BraA03g010710.3.5C;BraA03g011060.3.5C;BraA03g016740.3.5C;BraA03g020810.3.5C;BraA03g023340.3.5C;BraA03g025210.3.5C;BraA03g032300.3.5C;BraA03g034250.3.5C;BraA03g034270.3.5C;BraA03g036630.3.5C;…	87	up&down
Metabolism	Glycan biosynthesis and metabolism	ko00513	Various types of N-glycan biosynthesis	0.0026	0.0054	0.49	0.989026	0.895522	BraA01g009780.3.5C;BraA02g001490.3.5C;BraA02g025690.3.5C;BraA06g012750.3.5C;BraA07g037580.3.5C;BraA09g032530.3.5C	6	up&down
Genetic Information Processing	Transcription	ko03022	Basal transcription factors	0.0039	0.0072	0.55	0.989331	0.895522	BraA01g035210.3.5C;BraA02g042530.3.5C;BraA02g046470.3.5C;BraA06g009340.3.5C;BraA06g042170.3.5C;BraA07g021290.3.5C;BraA08g017840.3.5C;BraA09g027130.3.5C;BraA09g035180.3.5C	9	up&down
Genetic Information Processing	Folding, sorting and degradation	ko03050	Proteasome	0.0061	0.0101	0.6	0.99011	0.895522	BraA02g024820.3.5C;BraA03g002740.3.5C;BraA03g052930.3.5C;BraA03g057510.3.5C;BraA04g021510.3.5C;BraA04g022960.3.5C;BraA07g019550.3.5C;BraA07g032440.3.5C;BraA07g040840.3.5C;BraA07g040870.3.5C;BraA08g019460.3.5C;BraA09g017940.3.5C;BraA09g064910.3.5C;Brassica_rapa_newGene_206	14	up&down
Genetic Information Processing	Folding, sorting and degradation	ko03060	Protein export	0.0052	0.009	0.58	0.990647	0.895522	BraA02g042140.3.5C;BraA03g052980.3.5C;BraA05g032320.3.5C;BraA06g011350.3.5C;BraA06g025930.3.5C;BraA06g042220.3.5C;BraA07g012690.3.5C;BraA07g032210.3.5C;BraA09g039000.3.5C;BraA09g052600.3.5C;BraA10g006410.3.5C;Brassica_rapa_newGene_1059	12	up&down
Genetic Information Processing	Folding, sorting and degradation	ko04130	SNARE interactions in vesicular transport	0.0035	0.0067	0.52	0.991076	0.895522	BraA02g026310.3.5C;BraA04g007530.3.5C;BraA05g016090.3.5C;BraA06g005790.3.5C;BraA08g025240.3.5C;BraA08g033720.3.5C;BraA09g003960.3.5C;BraA09g060200.3.5C	8	up&down
Metabolism	Glycan biosynthesis and metabolism	ko00563	Glycosylphosphatidylinositol (GPI)-anchor biosynthesis	0.0013	0.0036	0.36	0.992768	0.895522	BraA02g023070.3.5C;BraA02g023240.3.5C;BraA09g042130.3.5C	3	up&down
Metabolism	Carbohydrate metabolism	ko00020	Citrate cycle (TCA cycle)	0.0044	0.0083	0.53	0.994784	0.895522	BraA01g001100.3.5C;BraA01g020730.3.5C;BraA03g004780.3.5C;BraA03g008900.3.5C;BraA03g013620.3.5C;BraA03g062330.3.5C;BraA07g024410.3.5C;BraA09g003370.3.5C;BraA09g025520.3.5C;BraA10g031270.3.5C	10	up&down
Metabolism	Biosynthesis of other secondary metabolites	ko00960	Tropane, piperidine and pyridine alkaloid biosynthesis	0.0039	0.0078	0.5	0.995689	0.895522	BraA04g022140.3.5C;BraA04g022260.3.5C;BraA04g031040.3.5C;BraA05g013860.3.5C;BraA05g015450.3.5C;BraA07g016080.3.5C;BraA08g010320.3.5C;BraA08g034200.3.5C;BraA09g019890.3.5C	9	up&down
Genetic Information Processing	Translation	ko03008	Ribosome biogenesis in eukaryotes	0.01	0.016	0.63	0.996496	0.895522	BraA01g042340.3.5C;BraA02g002650.3.5C;BraA02g004010.3.5C;BraA02g018830.3.5C;BraA02g024760.3.5C;BraA03g033480.3.5C;BraA03g033500.3.5C;BraA03g035980.3.5C;BraA05g001550.3.5C;BraA06g046380.3.5C;BraA07g017230.3.5C;BraA08g005000.3.5C;BraA08g008580.3.5C;BraA08g020390.3.5C;BraA08g032680.3.5C;BraA09g009830.3.5C;BraA09g014810.3.5C;BraA09g054840.3.5C;BraA09g065580.3.5C;BraA10g005030.3.5C;BraA10g010170.3.5C;…	23	up&down
Cellular Processes	Transport and catabolism	ko04145	Phagosome	0.0083	0.0146	0.57	0.998787	0.895522	BraA01g000280.3.5C;BraA01g008560.3.5C;BraA01g025380.3.5C;BraA01g038720.3.5C;BraA03g030950.3.5C;BraA03g052980.3.5C;BraA05g011540.3.5C;BraA05g033010.3.5C;BraA06g022010.3.5C;BraA06g031280.3.5C;BraA06g032410.3.5C;BraA07g040440.3.5C;BraA07g040540.3.5C;BraA07g042840.3.5C;BraA08g033390.3.5C;BraA09g050820.3.5C;Brassica_rapa_newGene_1635;Brassica_rapa_newGene_3183;Brassica_rapa_newGene_989	19	up&down
Genetic Information Processing	Transcription	ko03040	Spliceosome	0.0249	0.0357	0.7	0.999382	0.895522	BraA01g015110.3.5C;BraA01g031770.3.5C;BraA01g037110.3.5C;BraA01g040010.3.5C;BraA01g046030.3.5C;BraA02g004780.3.5C;BraA02g006480.3.5C;BraA02g019710.3.5C;BraA02g026180.3.5C;BraA03g007630.3.5C;BraA03g008290.3.5C;BraA03g015150.3.5C;BraA03g017810.3.5C;BraA03g021270.3.5C;BraA03g035810.3.5C;BraA03g043570.3.5C;BraA03g048720.3.5C;BraA03g052700.3.5C;BraA04g016120.3.5C;BraA04g020200.3.5C;BraA04g028510.3.5C;…	57	up&down
Genetic Information Processing	Folding, sorting and degradation	ko04141	Protein processing in endoplasmic reticulum	0.0292	0.0412	0.71	0.999577	0.895522	BraA01g001600.3.5C;BraA01g003110.3.5C;BraA01g015110.3.5C;BraA01g016020.3.5C;BraA01g019980.3.5C;BraA01g040010.3.5C;BraA02g006480.3.5C;BraA02g013440.3.5C;BraA02g024850.3.5C;BraA02g034550.3.5C;BraA03g013000.3.5C;BraA03g013140.3.5C;BraA03g013180.3.5C;BraA03g022340.3.5C;BraA03g031560.3.5C;BraA03g034410.3.5C;BraA03g035810.3.5C;BraA03g044930.3.5C;BraA03g052580.3.5C;BraA03g052700.3.5C;BraA03g052980.3.5C;…	67	up&down
Genetic Information Processing	Translation	ko00970	Aminoacyl-tRNA biosynthesis	0.0109	0.0197	0.55	0.999855	0.895522	BraA01g000800.3.5C;BraA01g002950.3.5C;BraA02g000080.3.5C;BraA02g008460.3.5C;BraA02g038200.3.5C;BraA03g018320.3.5C;BraA03g031490.3.5C;BraA03g050920.3.5C;BraA03g059980.3.5C;BraA03g060640.3.5C;BraA04g008460.3.5C;BraA05g013600.3.5C;BraA05g016740.3.5C;BraA05g034350.3.5C;BraA05g034720.3.5C;BraA06g031270.3.5C;BraA08g000860.3.5C;BraA08g016300.3.5C;BraA08g024850.3.5C;BraA09g020250.3.5C;BraA09g032980.3.5C;…	25	up&down
Metabolism	Energy metabolism	ko00190	Oxidative phosphorylation	0.0148	0.0256	0.58	0.999946	0.895522	BraA01g000280.3.5C;BraA01g033670.3.5C;BraA02g012660.3.5C;BraA02g045690.3.5C;BraA03g003870.3.5C;BraA03g030950.3.5C;BraA03g053950.3.5C;BraA03g063190.3.5C;BraA04g006450.3.5C;BraA05g011540.3.5C;BraA05g041290.3.5C;BraA06g022900.3.5C;BraA06g041570.3.5C;BraA07g040540.3.5C;BraA07g040850.3.5C;BraA07g042840.3.5C;BraA08g008270.3.5C;BraA08g018730.3.5C;BraA08g020860.3.5C;BraA08g022120.3.5C;BraA08g029930.3.5C;…	34	up&down
Genetic Information Processing	Translation	ko03015	mRNA surveillance pathway	0.0092	0.0204	0.45	0.999998	0.895522	BraA01g004230.3.5C;BraA01g009790.3.5C;BraA01g009800.3.5C;BraA01g034160.3.5C;BraA02g000960.3.5C;BraA02g010110.3.5C;BraA03g020340.3.5C;BraA03g039290.3.5C;BraA05g031820.3.5C;BraA05g039960.3.5C;BraA05g040810.3.5C;BraA07g010830.3.5C;BraA07g030520.3.5C;BraA08g009630.3.5C;BraA08g024890.3.5C;BraA09g025500.3.5C;BraA09g038010.3.5C;BraA09g042630.3.5C;BraA09g045290.3.5C;BraA09g045340.3.5C;BraA10g014470.3.5C	21	up&down
Genetic Information Processing	Translation	ko03013	RNA transport	0.0188	0.0346	0.54	1	0.895522	BraA01g004230.3.5C;BraA01g006940.3.5C;BraA01g009790.3.5C;BraA01g009800.3.5C;BraA02g002190.3.5C;BraA02g021950.3.5C;BraA02g027040.3.5C;BraA03g008540.3.5C;BraA03g013710.3.5C;BraA03g033480.3.5C;BraA03g039290.3.5C;BraA03g042220.3.5C;BraA03g057080.3.5C;BraA04g028440.3.5C;BraA05g008010.3.5C;BraA05g012950.3.5C;BraA05g016840.3.5C;BraA05g021320.3.5C;BraA05g031820.3.5C;BraA06g012960.3.5C;BraA06g017120.3.5C;…	43	up&down
