# Supplementary material for: Comparative Transcriptome Analysis of Purple and Green Flowering Chinese Cabbage and Functional Analyses of BrMYB114 Gene
Source: Int J Mol Sci. 2023 Sep 11;24(18):13951. doi: 10.3390/ijms241813951 (PMC10531404; doi:10.3390/ijms241813951)
Supplement: Supplementary file 1 [file ijms-24-13951-s001.zip › Table S6.xlsx]

## Sheet: classification
Supplemental Table S6: Differential transcription factors in PCT and GCX.
#ID	Family	Type
BraA01g001270.3.5C	ZBTB	TF
BraA01g001720.3.5C	HSF	TF
BraA01g003750.3.5C	bHLH	TF
BraA01g003820.3.5C	MYB	TF
BraA01g006150.3.5C	ZBTB	TF
BraA01g008380.3.5C	zf-CCCH	TF
BraA01g010850.3.5C	zf-CCCH	TF
BraA01g014550.3.5C	HMG	TF
BraA01g023580.3.5C	zf-C2H2	TF
BraA01g023610.3.5C	ZBTB	TF
BraA01g024980.3.5C	E2F	TF
BraA01g025510.3.5C	MYB	TF
BraA01g030190.3.5C	bHLH	TF
BraA01g034180.3.5C	bHLH	TF
BraA01g037540.3.5C	NF-YB	TF
BraA01g037660.3.5C	MBD	TF
BraA01g040310.3.5C	zf-CCCH	TF
BraA01g042050.3.5C	MYB	TF
BraA01g042050.3.5C	MYB	TF
BraA01g043260.3.5C	MYB	TF
BraA01g043730.3.5C	NF-YA	TF
BraA01g043730.3.5C	NF-YA	TF
BraA02g000430.3.5C	Homeobox	TF
BraA02g002170.3.5C	MYB	TF
BraA02g003800.3.5C	Homeobox	TF
BraA02g004750.3.5C	zf-LITAF-like	TF
BraA02g005910.3.5C	Homeobox	TF
BraA02g006010.3.5C	MYB	TF
BraA02g007390.3.5C	MYB	TF
BraA02g010380.3.5C	Homeobox	TF
BraA02g010900.3.5C	MYB	TF
BraA02g011900.3.5C	MYB	TF
BraA02g012800.3.5C	bHLH	TF
BraA02g013000.3.5C	zf-GATA	TF
BraA02g016360.3.5C	Homeobox	TF
BraA02g020880.3.5C	MYB	TF
BraA02g022050.3.5C	NF-YA	TF
BraA02g023300.3.5C	MYB	TF
BraA02g023540.3.5C	Homeobox	TF
BraA02g024510.3.5C	MYB	TF
BraA02g024520.3.5C	MYB	TF
BraA02g032270.3.5C	MYB	TF
BraA02g034920.3.5C	zf-GATA	TF
BraA02g036480.3.5C	zf-C2H2	TF
BraA02g036550.3.5C	MYB	TF
BraA02g036560.3.5C	zf-C2H2	TF
BraA02g037030.3.5C	MYB	TF
BraA02g037430.3.5C	SRF	TF
BraA02g037960.3.5C	bHLH	TF
BraA02g039960.3.5C	MYB	TF
BraA02g042120.3.5C	MYB	TF
BraA02g042530.3.5C	MYB	TF
BraA02g044590.3.5C	MYB	TF
BraA02g044590.3.5C	MYB	TF
BraA02g044610.3.5C	SRF	TF
BraA02g044960.3.5C	SRF	TF
BraA02g045010.3.5C	MYB	TF
BraA02g045580.3.5C	MYB	TF
BraA02g045930.3.5C	HSF	TF
BraA02g046820.3.5C	SRF	TF
BraA02g047580.3.5C	Homeobox	TF
BraA03g002010.3.5C	MYB	TF
BraA03g002780.3.5C	Others	TF
BraA03g003150.3.5C	MYB	TF
BraA03g003390.3.5C	NF-YB	TF
BraA03g003620.3.5C	MYB	TF
BraA03g004620.3.5C	Homeobox	TF
BraA03g006740.3.5C	bHLH	TF
BraA03g007580.3.5C	MYB	TF
BraA03g011110.3.5C	MYB	TF
BraA03g012760.3.5C	zf-GATA	TF
BraA03g015730.3.5C	bHLH	TF
BraA03g016210.3.5C	ZBTB	TF
BraA03g017110.3.5C	MYB	TF
BraA03g023930.3.5C	SRF	TF
BraA03g024450.3.5C	bHLH	TF
BraA03g025610.3.5C	HMG	TF
BraA03g027180.3.5C	MYB	TF
BraA03g028690.3.5C	Homeobox	TF
BraA03g030550.3.5C	bHLH	TF
BraA03g031560.3.5C	zf-CCCH	TF
BraA03g031560.3.5C	zf-CCCH	TF
BraA03g032700.3.5C	NF-YA	TF
BraA03g034070.3.5C	zf-CCCH	TF
BraA03g035770.3.5C	NF-YC	TF
BraA03g038170.3.5C	zf-GATA	TF
BraA03g041450.3.5C	bHLH	TF
BraA03g041720.3.5C	HSF	TF
BraA03g044810.3.5C	MYB	TF
BraA03g045370.3.5C	zf-BED	TF
BraA03g045390.3.5C	MYB	TF
BraA03g048100.3.5C	Homeobox	TF
BraA03g048590.3.5C	MYB	TF
BraA03g051490.3.5C	SRF	TF
BraA03g052730.3.5C	zf-GATA	TF
BraA03g053360.3.5C	bHLH	TF
BraA03g058580.3.5C	Homeobox	TF
BraA03g060080.3.5C	zf-GATA	TF
BraA03g061290.3.5C	bHLH	TF
BraA03g061600.3.5C	zf-BED	TF
BraA03g061650.3.5C	MYB	TF
BraA03g061880.3.5C	MYB	TF
BraA03g062090.3.5C	ZBTB	TF
BraA04g003600.3.5C	SRF	TF
BraA04g005680.3.5C	zf-BED	TF
BraA04g008060.3.5C	HMGA	TF
BraA04g013100.3.5C	HSF	TF
BraA04g016280.3.5C	CSD	TF
BraA04g017510.3.5C	SRF	TF
BraA04g018110.3.5C	MYB	TF
BraA04g018430.3.5C	Homeobox	TF
BraA04g021300.3.5C	bHLH	TF
BraA04g021400.3.5C	zf-GATA	TF
BraA04g023440.3.5C	ZBTB	TF
BraA04g027070.3.5C	ZBTB	TF
BraA04g029810.3.5C	HSF	TF
BraA04g033200.3.5C	MYB	TF
BraA05g000260.3.5C	zf-CCCH	TF
BraA05g000870.3.5C	bHLH	TF
BraA05g001020.3.5C	MYB	TF
BraA05g001150.3.5C	Homeobox	TF
BraA05g002730.3.5C	bHLH	TF
BraA05g004780.3.5C	Homeobox	TF
BraA05g004880.3.5C	zf-GATA	TF
BraA05g005280.3.5C	SRF	TF
BraA05g005290.3.5C	SRF	TF
BraA05g005890.3.5C	zf-CCCH	TF
BraA05g007230.3.5C	ZBTB	TF
BraA05g008380.3.5C	MYB	TF
BraA05g012660.3.5C	Homeobox	TF
BraA05g014070.3.5C	ZBTB	TF
BraA05g021320.3.5C	Homeobox	TF
BraA05g027510.3.5C	bHLH	TF
BraA05g028630.3.5C	zf-C2H2	TF
BraA05g029150.3.5C	HMGA	TF
BraA05g034600.3.5C	MYB	TF
BraA05g035140.3.5C	zf-BED	TF
BraA05g035420.3.5C	MYB	TF
BraA05g039410.3.5C	bHLH	TF
BraA05g040140.3.5C	Tub	TF
BraA05g041840.3.5C	E2F	TF
BraA05g041930.3.5C	Homeobox	TF
BraA05g042000.3.5C	MYB	TF
BraA05g042680.3.5C	HSF	TF
BraA05g043630.3.5C	MYB	TF
BraA06g000170.3.5C	MYB	TF
BraA06g004120.3.5C	MYB	TF
BraA06g005960.3.5C	MYB	TF
BraA06g006050.3.5C	NF-YC	TF
BraA06g007230.3.5C	zf-CCCH	TF
BraA06g007230.3.5C	zf-CCCH	TF
BraA06g010330.3.5C	Homeobox	TF
BraA06g014480.3.5C	MYB	TF
BraA06g016740.3.5C	HMGA	TF
BraA06g019120.3.5C	ZBTB	TF
BraA06g019300.3.5C	E2F	TF
BraA06g021070.3.5C	MYB	TF
BraA06g021070.3.5C	MYB	TF
BraA06g029670.3.5C	SRF	TF
BraA06g030270.3.5C	bHLH	TF
BraA06g031000.3.5C	MYB	TF
BraA06g031010.3.5C	bHLH	TF
BraA06g032430.3.5C	zf-BED	TF
BraA06g038030.3.5C	MYB	TF
BraA06g039460.3.5C	bHLH	TF
BraA06g040190.3.5C	bHLH	TF
BraA06g042640.3.5C	Homeobox	TF
BraA06g043890.3.5C	MYB	TF
BraA06g044700.3.5C	zf-C2H2	TF
BraA06g046190.3.5C	MYB	TF
BraA06g046190.3.5C	MYB	TF
BraA07g000640.3.5C	bHLH	TF
BraA07g002420.3.5C	Tub	TF
BraA07g002420.3.5C	Tub	TF
BraA07g003020.3.5C	CSD	TF
BraA07g008690.3.5C	HSF	TF
BraA07g008910.3.5C	MYB	TF
BraA07g014990.3.5C	MYB	TF
BraA07g014990.3.5C	MYB	TF
BraA07g014990.3.5C	MYB	TF
BraA07g016960.3.5C	ZBTB	TF
BraA07g017360.3.5C	bHLH	TF
BraA07g018790.3.5C	NF-YB	TF
BraA07g019250.3.5C	zf-C2H2	TF
BraA07g020710.3.5C	bHLH	TF
BraA07g020830.3.5C	Homeobox	TF
BraA07g023610.3.5C	zf-C2H2	TF
BraA07g023750.3.5C	zf-C2H2	TF
BraA07g023800.3.5C	bHLH	TF
BraA07g025830.3.5C	bHLH	TF
BraA07g026400.3.5C	Homeobox	TF
BraA07g029790.3.5C	Homeobox	TF
BraA07g031230.3.5C	Homeobox	TF
BraA07g031590.3.5C	bHLH	TF
BraA07g031920.3.5C	zf-C2H2	TF
BraA07g032420.3.5C	CG-1	TF
BraA07g033110.3.5C	MYB	TF
BraA07g033720.3.5C	CG-1	TF
BraA07g034400.3.5C	zf-C2H2	TF
BraA07g034910.3.5C	bHLH	TF
BraA07g035720.3.5C	Homeobox	TF
BraA07g037710.3.5C	bHLH	TF
BraA07g038340.3.5C	Others	TF
BraA07g039410.3.5C	MYB	TF
BraA07g039970.3.5C	MYB	TF
BraA07g040840.3.5C	MYB	TF
BraA08g004970.3.5C	zf-C2H2	TF
BraA08g005370.3.5C	Tub	TF
BraA08g005580.3.5C	Homeobox	TF
BraA08g013710.3.5C	HSF	TF
BraA08g016320.3.5C	bHLH	TF
BraA08g017300.3.5C	Homeobox	TF
BraA08g018400.3.5C	Others	TF
BraA08g021730.3.5C	Homeobox	TF
BraA08g021880.3.5C	MYB	TF
BraA08g022090.3.5C	Homeobox	TF
BraA08g022430.3.5C	Homeobox	TF
BraA08g023370.3.5C	MYB	TF
BraA08g025830.3.5C	zf-C2H2	TF
BraA08g026590.3.5C	Homeobox	TF
BraA08g029060.3.5C	MYB	TF
BraA08g030480.3.5C	zf-BED	TF
BraA08g033210.3.5C	MYB	TF
BraA08g033540.3.5C	NF-YC	TF
BraA08g033770.3.5C	HMG	TF
BraA08g033940.3.5C	zf-GATA	TF
BraA09g000420.3.5C	Homeobox	TF
BraA09g000540.3.5C	bHLH	TF
BraA09g001110.3.5C	bHLH	TF
BraA09g003790.3.5C	bHLH	TF
BraA09g003830.3.5C	MYB	TF
BraA09g004890.3.5C	MYB	TF
BraA09g005600.3.5C	MYB	TF
BraA09g007110.3.5C	MYB	TF
BraA09g007350.3.5C	SRF	TF
BraA09g007460.3.5C	MYB	TF
BraA09g007460.3.5C	MYB	TF
BraA09g007460.3.5C	MYB	TF
BraA09g009180.3.5C	ZBTB	TF
BraA09g011740.3.5C	bHLH	TF
BraA09g013760.3.5C	bHLH	TF
BraA09g015560.3.5C	Homeobox	TF
BraA09g015630.3.5C	bHLH	TF
BraA09g015950.3.5C	Homeobox	TF
BraA09g021230.3.5C	zf-CCCH	TF
BraA09g023160.3.5C	bHLH	TF
BraA09g027900.3.5C	HSF	TF
BraA09g028580.3.5C	HMG	TF
BraA09g029650.3.5C	bHLH	TF
BraA09g030450.3.5C	zf-BED	TF
BraA09g034150.3.5C	zf-CCCH	TF
BraA09g039260.3.5C	zf-C2H2	TF
BraA09g040540.3.5C	bHLH	TF
BraA09g040560.3.5C	HMG	TF
BraA09g040610.3.5C	Homeobox	TF
BraA09g041430.3.5C	Homeobox	TF
BraA09g043090.3.5C	ZBTB	TF
BraA09g043130.3.5C	MYB	TF
BraA09g048580.3.5C	zf-CCCH	TF
BraA09g049720.3.5C	ZBTB	TF
BraA09g054280.3.5C	HSF	TF
BraA09g055810.3.5C	Homeobox	TF
BraA09g056320.3.5C	bHLH	TF
BraA09g056390.3.5C	SRF	TF
BraA09g057830.3.5C	MYB	TF
BraA09g064620.3.5C	HMG	TF
BraA09g064870.3.5C	NF-YC	TF
BraA09g067420.3.5C	Others	TF
BraA10g000720.3.5C	zf-BED	TF
BraA10g014070.3.5C	HSF	TF
BraA10g015080.3.5C	zf-GATA	TF
BraA10g015080.3.5C	zf-GATA	TF
BraA10g016900.3.5C	MYB	TF
BraA10g016900.3.5C	MYB	TF
BraA10g017370.3.5C	MYB	TF
BraA10g017710.3.5C	MYB	TF
BraA10g017710.3.5C	MYB	TF
BraA10g017760.3.5C	zf-C2H2	TF
BraA10g018560.3.5C	zf-BED	TF
BraA10g022300.3.5C	MYB	TF
BraA10g024270.3.5C	bHLH	TF
BraA10g024290.3.5C	Homeobox	TF
BraA10g025750.3.5C	ZBTB	TF
BraA10g027700.3.5C	ZBTB	TF
BraA10g029190.3.5C	NF-YA	TF
BraA10g029450.3.5C	MYB	TF
BraA10g030790.3.5C	MYB	TF
BraA10g031030.3.5C	PC4	TF
BraA10g032160.3.5C	MYB	TF
BraA10g032400.3.5C	Homeobox	TF
BraA10g032490.3.5C	MYB	TF
BraA10g032940.3.5C	MYB	TF
Brassica_rapa_newGene_1659	zf-BED	TF
Brassica_rapa_newGene_3034	zf-BED	TF
Brassica_rapa_newGene_3349	MYB	TF
