# Supplementary material for: Comparative Transcriptome Analysis of Purple and Green Flowering Chinese Cabbage and Functional Analyses of BrMYB114 Gene
Source: Int J Mol Sci. 2023 Sep 11;24(18):13951. doi: 10.3390/ijms241813951 (PMC10531404; doi:10.3390/ijms241813951)
Supplement: Supplementary file 1 [file ijms-24-13951-s001.zip › Table S7.xlsx]

## Sheet: Sheet1
Supplemental Table S7: The primers used in this study.
Primer Name	Sense primer (5'-3')	Antisense primer (5'-3')	Primer purpose
62SK-BrMYB114	TAGAACTAGTGGATCC ATGGAGGGTTCGTCCCAA	GCTTGATATCGAATTCAGTTCCAGTTTCTCCATC	Amplified fragment
Q-BraA02g001350.3.5C	CCCTGAAGTAGTGGAACGAGTC	CGGTTGGCAATCCTGTCTT	qRT-PCR
Q-BraA04g022890.3.5C	TCAAGATGGGTCAGCGAAAC	TTCCTCCAGTGCTCACCATACA	qRT-PCR
Q-BraA07g032570.3.5C	CTCTGGCACGACGGGGTTA	TGTGGAAAAGAGGCAAAACG	qRT-PCR
Q-BraA02g005240.3.5C	AGTTGACATGCCTGGTGCTG	GCGAGGTCCTTGGCGAGA	qRT-PCR
Q-BraA07g022760.3.5C	ACTGTCCAACACCGTTACCCT	AACACCGATGACCGTGAAGAT	qRT-PCR
Q-BraA03g045960.3.5C	TTATCCATAGCCACGTTCCAGA	CCGCAGCCTCCTTGTTTT	qRT-PCR
Q-BraA01g023830.3.5C	CACATCAATTCTTCGAGCTTCC	AATCTTGTTTCCCACCCGTTA	qRT-PCR
Q-BraA10g030330.3.5C	TGCCCGCACTTGATTGTTT	TTCTTCATCGCCTCGTGTTCT	qRT-PCR
Q-BraA09g020360.3.5C	GGCTCGTGATGCGGCTAC	CCGTTTATGGCGTCATCGTA	qRT-PCR
Q-BraA01g013500.3.5C	AAAGGCGGCTATGGACTGG	ACGGGCAAACCGAAGAAC	qRT-PCR
Q-BraA10g022830.3.5C	GACCAGTGGGCTGATGTTGA	CGTCACATTCTTCGCCTAACC	qRT-PCR
Q-BraA07g033110.3.5C	CGACCTCGATCCTTCACCG	CAAACTTTCCCACCACCTATTC	qRT-PCR
Q-BraA09g029650.3.5C	ACACTTCTCATGTCACAACCCAC	ACGCCGCTTTCTCCACTC	qRT-PCR
Q-BrGAPDH	ACCACTAACTGCCTTGCTCCAC	CGGCTCTTCCACCTCTCCA	qRT-PCR
